# Structures of NF- $\kappa$ B p52 homodimer-DNA complexes rationalize binding mechanisms and transcription activation

Vladimir A. Meshcheryakov<sup>1,6,7</sup>, Wenfei Pan<sup>1,6</sup>, Tianjie Li<sup>2</sup>, Yi Wang<sup>2</sup>, Gourisankar Ghosh<sup>3</sup>, and Vivien Ya-Fan Wang<sup>1,4,5,\*</sup>

<sup>1</sup>Faculty of Health Sciences, University of Macau, Avenida da Universidade, Taipa, Macau SAR, China

<sup>2</sup>Department of Physics, The Chinese University of Hong Kong, Shatin, NT, Hong Kong SAR, China

<sup>3</sup>Department of Chemistry and Biochemistry, University of California, San Diego, 9500 Gilman Drive, La Jolla, CA 92093, USA

<sup>4</sup>Cancer Centre, Faculty of Health Sciences, University of Macau, Avenida da Universidade, Taipa, Macau SAR, China

<sup>5</sup>MoE Frontiers Science Center for Precision Oncology, University of Macau, Avenida da Universidade, Taipa, Macau SAR, China

<sup>6</sup>These authors contributed equally

<sup>7</sup>Present address: Molecular Cryo-Electron Microscopy Unit, Okinawa Institute of Science and Technology Graduated University, Onna, Kunigami, Okinawa, Japan

\* To whom correspondence should be addressed. Email: [vivienwang@um.edu.mo](mailto:vivienwang@um.edu.mo)

**Keywords:** DNA conformation, NF- $\kappa$ B, crystal structure, MD simulation, thermodynamics, kinetics, transcriptional regulation

## Abstract

The mammalian NF- $\kappa$ B p52:p52 homodimer together with its cofactor Bcl3 activates transcription of  $\kappa$ B sites with a central G/C base pair (bp), while it is inactive toward  $\kappa$ B sites with a central A/T bp. To understand the molecular basis for this unique property of p52, we have determined its structure in complex with a P-selectin(PSel)- $\kappa$ B DNA (5'-GGGGTGACCCC-3') (central bp is underlined) and variants changing the central bp to A/T or swapping the flanking bp. The structures reveal a nearly two-fold widened minor groove in the central region of the DNA as compared to all other currently available NF- $\kappa$ B-DNA complex structures, which have a central A/T bp. Molecular dynamics (MD) simulations show free DNAs exist in distinct preferred conformations, and p52:p52 homodimer induces the least amount of conformational changes on the more transcriptionally active natural PSel- $\kappa$ B DNA in the bound form. Our binding assays further demonstrate that the fast kinetics driven by entropy is correlated with higher transcriptional activity. Overall, our studies have revealed a novel conformation for  $\kappa$ B DNA in complex with NF- $\kappa$ B and suggest the importance of binding kinetics, dictated by free DNA conformational and dynamic states, in controlling transcriptional activation for NF- $\kappa$ B.

## 44 Introduction

45

46 The binding of transcription factors (TFs) to their specific DNA response elements in the  
47 promoters/enhancers of target genes is the key event regulating gene transcription and  
48 consequent cellular processes. For proper gene expression, TFs must interact  
49 selectively at the correct place and time and assemble into high-order complexes with  
50 specific DNA sequences and cofactors (Natoli et al., 2005, Mulero et al., 2019). In  
51 eukaryotic genomes, the ability of TFs to select a small subset of relevant binding sites  
52 out of the large excess of potential binding sites within the genomes is the foundation  
53 upon which transcriptional regulation is built. Structural studies have provided valuable  
54 information on how various DNA binding domains recognize their cognate DNA binding  
55 sites at atomic resolution (Garvie and Wolberger, 2001). However, how TFs discriminate  
56 between closely related, but biologically distinct, DNA sequences is not well understood.

57 The NF- $\kappa$ B family of TFs regulates diverse biological responses (Zhang et al., 2017).  
58 Mammalian NF- $\kappa$ B is assembled combinatorially from five subunits, p50/NF- $\kappa$ B1,  
59 p52/NF- $\kappa$ B2, RelA/p65, c-Rel and RelB, into homo- and heterodimers which bind to  
60 specific DNA sequences, known as  $\kappa$ B site or  $\kappa$ B DNA. All five subunits share a highly  
61 conserved region at their N-termini, referred to as the Rel homology region (RHR), and  
62 the three-dimensional structures of the RHR are also highly conserved among these  
63 proteins. The RHR is roughly 300 residues in length and contains the N-terminal domain  
64 (NTD), dimerization domain (DD) and nuclear localization signal (NLS). The DD alone  
65 mediates protein homo- and heterodimerization; the NTD and DD together are  
66 responsible for DNA binding; the NLS region is flexible in solution and together with the  
67 DD forms the binding sites for the inhibitor of NF- $\kappa$ B (I $\kappa$ B) proteins.

68 The NF- $\kappa$ B proteins can be further divided into two sub-classes: the p50 and p52  
69 subunits belong to class I by virtue of their lack of a transcriptional activation domain  
70 (TAD). The other three subunits, RelA, c-Rel and RelB, constitute class II with every  
71 member containing a TAD at its C-terminus. Mature p50 and p52 subunits are generated  
72 via incomplete proteolysis of their precursor proteins p105 and p100 (Supplemental Fig.  
73 S1A), respectively. Therefore, p50 and p52 possess a short glycine rich region (GRR) at  
74 their C-termini.

75 The initial discovery and characterization of several physiological  $\kappa$ B DNAs  
76 established the pseudo-symmetric consensus sequence as 5'-  
77 (-5)G(-4)G(-3)G(-2)R(-1)N(0)W(+1)Y(+2)Y(+3)C(+4)C-3' (Lenardo and Baltimore,

78 1989), where R = purines, N = any nucleotides, W = either A or T, and Y = pyrimidines.  
79 The subsequent identification of new NF- $\kappa$ B-DNA binding sites broadened the  
80 consensus to 5'-(−5)G(−4)G(−3)G(−2)N(−1)N(0)N(+1)N(+2)N(+3)C(+4)C-3' (Chen and  
81 Ghosh, 1999, Mulero et al., 2019). The critical features of the consensus  $\kappa$ B DNA  
82 sequence are the presence of a series of G and C bases at the 5' and 3' ends,  
83 respectively, while the bases at the central region can vary. X-ray structures of various  
84 NF- $\kappa$ B dimers in complex with different  $\kappa$ B DNAs revealed conserved protein-DNA  
85 recognition modes for  $\kappa$ B DNA that follows the consensus sequence (Muller et al., 1995,  
86 Ghosh et al., 1995, Cramer et al., 1997, Chen et al., 1998a, Huang et al., 2001, Moorthy  
87 et al., 2007, Fusco et al., 2009, Chen et al., 1998b, Chen et al., 2000, Escalante et al.,  
88 2002, Berkowitz et al., 2002, Chen-Park et al., 2002, Panne et al., 2007). The RHR of  
89 each monomer binds to half of a  $\kappa$ B DNA, called half-site. A set of conserved amino acid  
90 (aa) residues mediate base-specific contacts to the 5' and 3' flanking G and C bases; the  
91 inner, more variable bases participate in important, but less base-specific interactions.  
92 The central bp lies at the pseudo-dyad axis of the dimer and is not directly contacted by  
93 the protein.

94 Genome-wide NF- $\kappa$ B-DNA motif identification studies revealed that NF- $\kappa$ B associates  
95 not only with consensus  $\kappa$ B DNAs, but also with sequences containing only one half-site  
96 consensus, and even some sequences with no consensus (Lim et al., 2007, Martone et  
97 al., 2003, Zhao et al., 2014). *In vitro* binding experiments have been carried out to  
98 classify  $\kappa$ B DNAs according to their binding specificity for different NF- $\kappa$ B dimers. The  
99 binding affinity displayed by various NF- $\kappa$ B dimers for distinct  $\kappa$ B DNAs does not  
100 necessarily correlate with what occurs during regulation of gene expression *in vivo*. For  
101 example, the p50:RelA heterodimer binds tightly to most  $\kappa$ B DNAs, whereas RelA:RelA  
102 and c-Rel:c-Rel homodimers bind many of the same sequences with relatively low  
103 affinity. However, detailed genetic experiments have shown that some genes are  
104 activated only in the presence of one or a subset of NF- $\kappa$ B subunits, such as mice  
105 lacking c-Rel exhibit defects in IL-2 and IL-12 expression (Kontgen et al., 1995,  
106 Hoffmann et al., 2003). In addition to specific gene activation, NF- $\kappa$ B dimers are also  
107 known to repress transcription. The RelA and p50 dimers have been shown to repress  
108 the expressions of *nrp1* gene, which is essential for osteoclast differentiation, and the  
109 interferon-stimulated response element (ISRE), respectively (Cheng et al., 2011,  
110 Hayashi et al., 2012). Both of these sites also display only half-site similarity to the  $\kappa$ B  
111 DNA consensus. Structural and biochemical analyses of NF- $\kappa$ B-DNA binding have also

112 revealed the existence of a large number of  $\kappa$ B DNAs that display relatively similar  
113 affinities compared with  $\kappa$ B consensus even though they lack one consensus half-site  
114 entirely (Ghosh et al., 2012, Siggers et al., 2011). Therefore, *in vitro* data do not fully  
115 capture the complexity of DNA recognition and gene regulation by NF- $\kappa$ B in cells.

116 NF- $\kappa$ B p52 is generated from the precursor protein p100 (Supplemental Fig. S1A), a  
117 tightly regulated process that requires specific stimuli. Unregulated p100 processing into  
118 p52 results in multiple myeloma and other lymphoid malignancies, which is detrimental  
119 to normal cellular function (Courtois and Gilmore, 2006, Annunziata et al., 2007, Keats et  
120 al., 2007). We previously demonstrated that the p52:p52 homodimer could sense a  
121 single bp change from G/C to A/T at the central position of a  $\kappa$ B DNA (Wang et al.,  
122 2012). The p52:p52 homodimer binds both  $\kappa$ B DNAs; but only in the case of the G/C-  
123 centric DNA, p52:p52 homodimer can associate with its specific cofactor Bcl3  
124 (p52:p52:Bcl3 complex) and activate transcription by recruiting histone  
125 acetyltransferases. When bound to the A/T-centric DNA, the same p52:p52:Bcl3  
126 complex represses gene transcription through the recruitment of histone deacetylases. It  
127 is intriguing that the identity of a non-contacted nucleotide should have such a drastic  
128 effect on transcriptional selectivity. Leung et al reported that the transcriptional activity of  
129 the RelA:RelA homodimer upon binding to A- and T-centric DNAs are different (Leung et  
130 al., 2004). Taken together, these reports strongly suggest that NF- $\kappa$ B transcriptional  
131 outcomes are coded within specific  $\kappa$ B DNA sequences. Even small changes in the  
132 promoter specific  $\kappa$ B DNAs, which do not alter the overall NF- $\kappa$ B binding affinity, might  
133 alter the gene expression profiles. Although structural studies have revealed a  
134 stereochemical mechanism of how NF- $\kappa$ B dimers bind  $\kappa$ B DNAs, the effect of DNA  
135 conformation on complex formation remains underappreciated and it requires solid  
136 understanding of both structure and dynamics of  $\kappa$ B DNAs to elucidate such a  
137 mechanism.

138 In the present study, we determined the crystal structures of the p52:p52 homodimer  
139 in complex with the PSe1- $\kappa$ B DNA and two related DNAs where the central three  
140 positions were varied. PSe1 is a known target gene regulated by the p52:p52:Bcl3  
141 complex in cells, and it contains a G/C-centric  $\kappa$ B DNA in the promoter region (Pan and  
142 McEver, 1995, Wang et al., 2012). All three complexes revealed a widening of the DNA  
143 minor groove in the central region. *In vitro* experiments further demonstrated different  
144 thermodynamic and kinetic binding features: the binding of p52:p52 with transcriptional  
145 active promoters is driven by entropy with faster kinetics. The combination of structural,

146 MD simulations, and biochemical studies presented here provides new insights into  
147 allosteric control by closely related  $\kappa$ B DNAs on NF- $\kappa$ B-dependent transcriptional  
148 specificity.

149

## 150 **Results**

151

### 152 **The central base pairs in PSeI- $\kappa$ B DNA regulate p52:p52:Bcl3 transcriptional** 153 **activity**

154 Structures of several NF- $\kappa$ B dimers in complex with various  $\kappa$ B DNAs have been  
155 reported over the past twenty-five years. In all these structures, the DNA sequences  
156 contain A/T-centric  $\kappa$ B sites (Supplemental Fig. S2E) (Ghosh et al., 1995, Muller et al.,  
157 1995, Cramer et al., 1997, Chen et al., 1998b, Huang et al., 2001, Moorthy et al., 2007,  
158 Fusco et al., 2009, Chen et al., 1998a). The PSeI- $\kappa$ B DNA (5'-GGGGIGACCCC-3') (the  
159 central bp is in red color, bps at  $\pm 1$  positions are underlined), a natural binding site  
160 known to be specifically regulated by the p52:p52:Bcl3 complex (Pan and McEver, 1995,  
161 Wang et al., 2012), is distinctive from the canonical  $\kappa$ B sites not only at the central  
162 position but also the two flanking positions. Whereas p50 and other subunits prefers an  
163 A:T at  $-1$  and T:A at  $+1$  positions, such as the MHC- $\kappa$ B site (5'-GGGGATICCCC-3'),  
164 PSeI- $\kappa$ B contains T:A and A:T at the equivalent positions, respectively. We mutated the  
165 central and flanking bps to generate PSeI (mutant A/T) and ( $-1/+1$  swap) DNAs.  
166 Transcriptional activity of the p52:p52:Bcl3 complex was measured for these three and  
167 MHC- $\kappa$ B sites using a luciferase reporter based assay. The natural PSeI luciferase  
168 reporter could be activated by endogenous NF- $\kappa$ B with co-expression of Bcl3 followed by  
169 LPS stimulation (Fig. 1A). To investigate the effects of PSeI (mutant A/T) and ( $-1/+1$   
170 swap) on transcriptional activity, luciferase reporter constructs with the variants or MHC-  
171  $\kappa$ B site were co-transfected with p52 and Bcl3 expression plasmids. PSeI (mutant A/T)  
172 showed 2-fold reduced reporter activity, while both PSeI ( $-1/+1$  swap) and MHC- $\kappa$ B  
173 showed drastically reduced transcriptional activity as compared to the natural PSeI- $\kappa$ B  
174 (Fig. 1A; Supplemental Fig. S1C). These results suggest that the bp identity at all three  
175 positions in the central region are critical in determining transcriptional activity of the  
176 p52:p52:Bcl3 complex, which is in line with our previous study that the central bp of  $\kappa$ B  
177 DNAs plays critical roles in transcriptional regulation (Wang et al., 2012).

### 178 **Widened minor groove in PSeI- $\kappa$ B DNA in complex with NF- $\kappa$ B p52:p52** 179 **homodimer**

180 Since only p52 mediates DNA interactions in the p52:p52:Bcl3 complex  
181 (Supplemental Fig. S1D) (Bours et al., 1993), we focused our study on (p52:p52)-DNA  
182 and speculated that the observed transcriptional differences could be due to different  
183 structural features of (p52:p52)-DNA complexes. We solved the crystal structures of  
184 p52:p52 homodimer in complex with all three PSeI- $\kappa$ B DNAs (Fig. 1C-H; Table 1). The  
185 p52 protein works as a bridging factor between target DNAs and Bcl3; therefore, a  
186 recombinant p52 protein (aa 1-398) which could form complex with Bcl3 was co-  
187 crystallized with the DNAs (Supplemental Fig. S1E-H). This p52 construct contains most  
188 of the GRR region which was not included in any previous NF- $\kappa$ B structures  
189 (Supplemental Fig. S1B, S2E); however, no electron density was observed for the C-  
190 terminal part (aa 330-398) in the structures.

191 The overall structures of p52:p52 in complex with the natural PSeI- $\kappa$ B DNA and two  
192 variants are similar to each other (Fig. 1D, H). However, compared to previously known  
193 structures of NF- $\kappa$ B-DNA complexes, two striking differences are observed. One is that  
194 all three PSeI- $\kappa$ B DNAs exhibited a distinct widening of the minor groove at the two  
195 base-steps around the central position 0 (-1 to 0 and 0 to +1), with width of  $\sim 7.5$  Å (Fig.  
196 1E-G, I). In comparison, the A/T-centric  $\kappa$ B DNAs studied earlier,  $\kappa$ B-33 (5'-  
197 GGAATTTCC-3') (Chen et al., 1998b, Huang et al., 2005) and another one that we  
198 now name  $\kappa$ B-55 (5'-GGGAATTCCC-3') (Moorthy et al., 2007, Fusco et al., 2009), have  
199 significantly compressed minor groove in both their bound and free states as compared  
200 to an ideal B-form DNA (Fig. 1I; Supplemental Fig. S2A-B). Compressed minor groove  
201 width (MGW) is a common feature of all A/T-centric  $\kappa$ B DNAs bound to NF- $\kappa$ B dimers  
202 which is remarkably different from the MGW of the PSeI- $\kappa$ B DNAs seen in the present  
203 structures (Supplemental Fig. S2E).

#### 204 **The widened minor groove is observed with long p52 proteins**

205 The other difference observed for the three p52:p52 structures reported here  
206 concerns the organization of the dimer and the complex with DNA. The p52-MHC- $\kappa$ B  
207 DNA (which is A/T-centric) complex is the only previously determined crystal structure of  
208 NF- $\kappa$ B p52:p52 homodimer (Cramer et al., 1997). Superposition of the p52:p52  
209 homodimer in the MHC- $\kappa$ B and natural PSeI- $\kappa$ B complexes aligned by the DDs reveals  
210 large rigid body movement of NTDs with rotation of  $\sim 20^\circ$  and translation along rotation  
211 axis of  $\sim 1.4$  Å (Fig. 2A). This results in shifting of the NTD along PSeI DNA toward its  
212 flanks by  $\sim 13$  Å for both sides. In addition, the minor groove of the MHC- $\kappa$ B DNA at the

213 central segment is compressed like all other NF- $\kappa$ B-DNA complexes indicated above  
214 (Fig. 1I; Supplemental Fig. S2C).

215 The PSeI- $\kappa$ B DNAs (18 bp) and recombinant p52 protein (aa 1-398, including the  
216 GRR) used in the current study are both longer than those in the MHC- $\kappa$ B DNA complex  
217 (13bp and aa 35-329). In fact, all currently available structures of NF- $\kappa$ B- $\kappa$ B DNA  
218 complexes in the Protein Data Bank (PDB) contain short NF- $\kappa$ B proteins (only NTD and  
219 DD) and A/T-centric  $\kappa$ B DNAs (Supplemental Fig. S2E) (Ghosh et al., 1995, Muller et al.,  
220 1995, Cramer et al., 1997, Chen et al., 1998b, Huang et al., 2001, Moorthy et al., 2007,  
221 Fusco et al., 2009, Chen et al., 1998a). To test if the DNA and protein length variations  
222 induce structural changes in the complex, we crystallized a 13bp PSeI (mutant A/T) DNA  
223 bound to a shorter p52 protein (aa 1-327). The conformation of this complex is nearly  
224 identical to p52-MHC- $\kappa$ B complex with MGW less than 4 Å at the central position (Fig.  
225 2B, 1I; Supplemental Fig. S2D). This crystal with short p52 is in a different crystal form  
226 compared to the three structures with the long p52, and it is also in a different crystal  
227 form compared to the MHC- $\kappa$ B DNA complex, suggesting that crystal packing is unlikely  
228 to be the main cause of the structural differences, and that both the DNA and protein  
229 lengths play significant roles.

230 Therefore, our structures demonstrate a correlation between the length of the p52  
231 protein and the conformation of the  $\kappa$ B DNA and the organization of the p52:p52 dimer in  
232 the complex. As discussed above, the short p52 protein (aa 1-327) failed to interact with  
233 Bcl3 (Supplemental Fig. S1E-H), partly due to the lack of the GRR. We used the long  
234 p52 protein (aa 1-398) for the rest of the studies.

### 235 **Distinct protein-DNA interactions in the p52:p52-DNA complexes**

236 The widening of the minor groove propagates from the central position to all four base  
237 steps on both sides with values around 5-6 Å (Fig. 1I). This widening and the  
238 consequent deepening of the major groove have significant impact on protein-DNA  
239 interactions. The most significant of which is the loss of cross-strand base contacts by  
240 Arg52 (Fig. 3A). The cross-strand contacts between the homologous Arg (Arg54 in p50  
241 and Arg33 in RelA) and DNA is observed in all other A/T-centric NF- $\kappa$ B-DNA structures  
242 (Fig. 3B; Supplemental Table S1).

243 The other notable feature of the PSeI- $\kappa$ B DNA complexes is the highly asymmetric  
244 DNA contacts by p52:p52 homodimer. Monomer I is closer to its cognate half-site  
245 making more direct contacts with the DNA than monomer II (Supplemental Fig. S3A).

246 Although asymmetric DNA binding by the symmetric homodimer is a common feature in  
247 all NF- $\kappa$ B-DNA complexes, it is significantly more pronounced in the present structures.  
248 Moreover, the p52:52 homodimer also displays substantial asymmetry. With the DD of  
249 the two monomers in superposition, the NTDs rotate from each other by  $\sim 6^\circ$  (Fig. 2C).  
250 The interdomain interaction is extensive in monomer I compared to that in monomer II  
251 (Fig. 2D).

252 In the PSeI- $\kappa$ B complex, the side chains of Lys221, Arg52, Arg54 and His62 in p52  
253 monomer I make direct base-specific contacts to four consecutive G(s) from +2 to +5  
254 positions (Fig. 3C, Left). In addition, Ser61 also makes direct contact with A at  $\pm 6$  and  $\pm 7$   
255 positions; these contacts are not possible for the short p52 (aa 1-327) co-crystallized  
256 with 13bp  $\kappa$ B DNAs such as MHC and PSeI (mutant A/T)- $\kappa$ B (Supplemental Fig. S3A-B).  
257 p52 monomer II makes contact with only three G(s) from position -3 to -5 (Fig. 3C,  
258 Right). The conformation of loop L3 in the two p52 monomers are different;  
259 consequently, only Lys221 in monomer I makes specific contacts with G at position +2  
260 (Supplemental Fig. S3C). Glu58 helps to position Arg52, Arg54 and His62, and makes  
261 base-specific interaction to the opposite C at  $\pm 3$  position.

262 In addition to base-specific interactions, there are multiple protein contacts to the  
263 DNA phosphate backbone, mostly to the central region of the DNA. The side chain of  
264 Cys57 hydrogen bonds to the backbone phosphate group of C at  $\pm 2$ ; and the side chains  
265 of Tyr55 and Lys143 hydrogen bond to the backbone phosphate group of A at  $\pm 1$ . Only  
266 in monomer II does the side chains of Lys143 make an additional hydrogen bond (H-  
267 bond) to the backbone phosphate group of C at position 0 (Fig. 3D). Interestingly, all  
268 other NF- $\kappa$ B-DNA complexes, including the short p52:p52 homodimer bound to both  
269 13bp MHC- $\kappa$ B and PSeI (mutant A/T)- $\kappa$ B DNAs, exhibit more backbone contacts by  
270 Gln284 and Gln254 (Supplemental Fig. S3B; Supplemental Table S1). The presence of  
271 an additional positively charged residue in loop L2 in the other NF- $\kappa$ B subunits (p52:  
272 T<sup>142</sup>KKN; p50: TKKK; and RelA: KKRK) enhances backbone binding at the minor groove  
273 side including cross-strand interactions (Fig. 3E). In addition, there is a unique basic  
274 segment in p52, a peptide rich in basic residues (K<sup>179</sup>ELKK), located near the end of  
275 helix  $\alpha 2$  (Fig. 3E). These basic residues possibly mediate long-range electrostatic  
276 interactions with the negatively charged DNA backbone which might pull the DNA  
277 strands away from each other towards the p52 protein (Fig. 3F). In summary, amino acid  
278 composition in loop L2 and helix  $\alpha 2$  might play an important role in determining DNA



279 binding by the NF- $\kappa$ B dimers.

### 280 **MD simulations reveal free DNAs exist in distinct preferred conformations**

281 In order to investigate whether MGW of the PSeI- $\kappa$ B DNA variants observed in the  
282 current complexes is induced by the protein or it is intrinsic to DNA sequences, we  
283 carried out microsecond-long MD simulations for the four  $\kappa$ B DNAs in free form. The  
284 simulations started from the DNA conformation in the crystal structures of the  
285 complexes, with the three PSeI- $\kappa$ B DNA variants having a widened minor groove and the  
286 MHC- $\kappa$ B DNA having a narrow minor groove. At the end of the simulation, PSeI (natural  
287 G/C-centric) and (mutant A/T-centric) maintained the widened minor groove, while PSeI  
288 (-1/+1 swap) displays a narrow minor groove at the central 0 position similar to MHC- $\kappa$ B  
289 DNA in the simulations (Fig. 4A). The swap of T and A at  $\pm 1$  positions reverses the  
290 geometric conformation of bps at both positions (Fig. 4C). Specifically, these swaps  
291 cause an opposite orientation of each nucleotide, forcing the bps to adopt an opposite  
292 shear and buckle direction compared to those on the non-swapped DNAs. The thymine  
293 at both positions slides and tilts towards the minor groove simultaneously, narrowing the  
294 central minor grooves (Supplemental Fig. S4A).

295 The simulations also reveal a narrowed minor groove of the A/T-centric DNA at +1  
296 position compared to the corresponding G/C-centric DNA with the same flanking bps, i.e.  
297 PSeI (mutant A/T-centric) compared to PSeI (natural G/C-centric), and MHC compared  
298 to PSeI (-1/+1-swap) (Fig. 4B). The A:T bp at 0 position shows large shear, buckle and  
299 opening, forcing a register towards the minor groove in the curvature of free A/T-centric  
300 DNAs (Supplemental Fig. S4A). This conformation orients the thymine towards the minor  
301 groove and might have caused the decrease in MGW at +1 position. Collectively, having  
302 A:T at N position or T:A at N+2 position is likely to intrinsically reduce the MGW at N+1  
303 position. Our finding is in line with the observations of compressed minor groove of free  
304  $\kappa$ B-33 DNA or the bending into minor groove from continuous A:T in A-tract DNAs  
305 (Barbič et al., 2003).

306 Comparison of MD simulations and crystal structures suggests that upon binding to  
307 p52 the -1/+1 swap DNA experiences more disruptive conformational change than the  
308 natural G/C-centric PSeI- $\kappa$ B (Fig. 4A; Supplemental Fig. S4B). The binding at the central  
309 part of both DNAs is symmetrically facilitated through the H-bonds between two residues  
310 (Lys143 and Tyr55) from each monomer of p52 and the phosphate of nucleotides at -1  
311 and +1 and T-shaped  $\pi$ -stacking interactions between DNA bases and Tyr55. These two

312 residues in the two p52 monomers are positioned further apart in the PSeI- $\kappa$ B DNA  
313 complex compared to the MHC- $\kappa$ B DNA complex. Unlike the natural G/C-centric DNA,  
314 the bindings on both strands of  $-1/+1$  swap DNA draw the bound thymine in the opposite  
315 direction of the minor groove, breaking the intra-bp H-bonds and severely distorts the  
316 central bps (Supplemental Fig. S4B). It appears that p52:p52 homodimer adopts a  
317 specific conformation with a nearly fixed inter-monomer distance upon the binding to  $\kappa$ B  
318 DNAs, such that it tears the central part of  $-1/+1$  swap DNA into a favored binding  
319 conformation. Overall, the comparative analysis of MD simulations and crystal structures  
320 suggests that the p52:p52 homodimer induces the least amount of conformational  
321 changes on  $\kappa$ B DNA with an intrinsically widened minor groove.

### 322 **The p52 homodimer recognizes $\kappa$ B DNAs with different thermodynamic features**

323 Structural analysis described above did not provide a strong correlation between the  
324 conformational states of (p52:p52)-DNA complexes and the transcriptional output. We  
325 next tested whether p52:p52 homodimer binds to the natural G/C-centric, mutant A/T-  
326 centric, and  $-1/+1$  swap PSeI- $\kappa$ B, as well as MHC- $\kappa$ B DNAs with different mechanisms  
327 and/or affinities. In all cases, long p52 protein (aa 1-398) as well as long DNA were  
328 used. Isothermal titration calorimetry (ITC) reveals that p52:p52 binds all three PSeI- $\kappa$ B  
329 DNA variants with similar binding affinities ( $K_d$ ) of approximately 70 nM whereas it binds  
330 MHC- $\kappa$ B DNA more than 2-fold tighter (Fig. 5A-D). However, binding of p52 to the  
331 natural G/C-centric PSeI- $\kappa$ B DNA is associated with a large increase in entropy ( $\Delta S$ ),  
332 while the binding to the MHC- $\kappa$ B DNA showed a large decrease in entropy. On the other  
333 hand, the binding to the MHC and mutant A/T-centric PSeI DNAs showed a much larger  
334 decrease in enthalpy ( $\Delta H$ ). These results suggest that the binding of p52:p52 homodimer  
335 to the G/C-centric  $\kappa$ B DNA is favored by entropy, whereas the binding to the A/T-centric  
336 DNA is driven by enthalpy.

337 To test if this mechanism is general to other  $\kappa$ B DNAs, we also determined the  
338 thermodynamic parameters for p52 binding to Skp2- $\kappa$ B DNA. Skp2- $\kappa$ B DNA is present in  
339 the promoter of S-phase kinase-associated protein 2 (Skp2) and it is also regulated by  
340 the p52:p52 homodimer and Bcl3 (Supplemental Fig. S5A) (Barre and Perkins, 2007,  
341 Wang et al., 2012). Skp2- $\kappa$ B DNA is another natural G/C-centric (5'-GGGGA<sup>G</sup>ITCC-3')342  $\kappa$ B DNA but with the presence of A:T and T:A bp at +1 and  $-1$  positions, the same as the  
343  $-1/+1$  swap PSeI DNA in the central region. Skp2 also has a very different 4bp half-site,  
344 TTCC, at the +1 to +4 positions. The  $K_d$  as well as relative contributions of entropy and

345 enthalpy to the binding to Skp2 and -1/+1 swap PSeI DNAs are similar (Fig. 5C;  
346 Supplemental Fig. S5B). These results suggest that DNA sequence and conformational  
347 differences lead p52 to bind DNAs through different thermodynamic binding processes.  
348 However, thermodynamic binding mechanism does not fully capture the differential  
349 transcriptional output mediated by these  $\kappa$ B DNAs.

### 350 **The p52 homodimer binds $\kappa$ B DNAs with different kinetic features**

351 We next examined the binding kinetics of p52 and  $\kappa$ B DNAs as there is mounting  
352 evidence that, separate from binding affinity, kinetic rate constants ( $k_{on}$  and  $k_{off}$ ) are  
353 crucial to the physiological effects of protein-ligand interactions in a variety of cellular  
354 processes (Nakajima et al., 2001, Gross and Lodish, 2006, Gonzalez et al., 2005,  
355 Markgren et al., 2002). We utilized biolayer interferometry (BLI) to study the association  
356 and dissociation rate of p52:p52 binding to various  $\kappa$ B DNAs. Biotinylated DNAs were  
357 immobilized on the streptavidin (SA) sensors and tested with purified p52 protein. The  
358 binding kinetics differ significantly among the DNAs. The binding of more  
359 transcriptionally active natural G/C-centric PSeI showed a higher association ( $k_{on}$ ) and  
360 dissociation rate ( $k_{off}$ ) than the other two variants and MHC- $\kappa$ B DNAs (Fig. 6A-E).  
361 Consistently, in the case of Skp2- $\kappa$ B DNA, the more transcriptionally active natural G/C-  
362 centric Skp2 showed a faster kinetics than its mutant A/T-centric, especially the  $k_{off}$   
363 (Supplemental Fig. S6A-C).

364 We further determined the  $k_{on}$  and  $k_{off}$  of the transcriptionally competent p52:p52:Bcl3  
365 complex binding to PSeI- $\kappa$ B DNA variants by BLI. In agreement with our previous study,  
366 only the recombinant phospho-mimetic Bcl3 from *E. coli* forms ternary complex with  
367 p52:p52 homodimer and  $\kappa$ B DNA (Wang et al., 2017). Both recombinant WT and  
368 phospho-mimetic Bcl3 protein (S33/114/446E mutant) interact with p52 with similar  
369 kinetics (Supplemental Fig. S1F, S7A-C); however, the p52:p52:WT-Bcl3 complex does  
370 not bind DNAs (Supplemental Fig. S7D-E). The binding of p52:p52:phospho-Bcl3 with  
371 the natural G/C-centric PSeI DNA exhibited both higher  $k_{on}$  and  $k_{off}$  (Fig. 6F-J). Similarly,  
372 the binding with the natural G/C-centric Skp2 DNA also showed a higher  $k_{off}$  comparing  
373 to its A/T-centric mutant (Supplemental Fig. S6D-F).

374 Overall, the binding kinetics of p52:p52 homodimer alone vs. p52:p52:Bcl3 complex  
375 follows the same trend. Moreover, a comparison of binding affinity, association and  
376 dissociation rates with respect to the more transcriptionally active PSeI and Skp2- $\kappa$ B  
377 sites shows a correlation between transcriptional output and the dissociation rate. The

378 slower the  $k_{\text{off}}$ , the lower the reporter activities for both (p52:p52)-DNA and  
379 (p52:p52:Bcl3)-DNA complexes (Fig. 6K; Supplemental Fig. S6G). Therefore,  
380 transcriptional activity may have a closer link to the binding kinetics rather than the  
381 thermodynamic stability of the complex.

382

## 383 **Discussion**

384

### 385 **The p52 homodimer recognizes $\kappa$ B DNA using a mode distinct from other NF- $\kappa$ B** 386 **dimers**

387 Double-stranded DNA helices are not static entities that simply present themselves to  
388 proteins and assemble into multiprotein complexes at specific sequences. The DNA  
389 duplex is intrinsically dynamic on many levels and time scales in cells. The movement of  
390 DNA through its different conformational states is continuous and is influenced by, but  
391 not completely dependent upon, its nucleotide sequence. Structures presented in this  
392 study show that the conformations of all three PSe1- $\kappa$ B DNA variants bound to the long  
393 p52:p52 homodimer are similar but are distinct from all previously known complexes  
394 between  $\kappa$ B DNAs and six other NF- $\kappa$ B dimers (p50:p50, p50:RelA, p50:RelB,  
395 RelA:RelA, c-Rel:c-Rel and p52:RelB). It was noted earlier a compressed minor groove  
396 in the central region of the DNA is a key feature of NF- $\kappa$ B-DNA complexes. The minor  
397 groove at the central three positions is significantly widened in all three complexes  
398 presented here. However, MD simulations show free DNAs exist in distinct preferred  
399 conformations, which appears to be adjusted by p52 into a unique shape for recognition.  
400 And notably, the more transcriptionally active natural PSe1- $\kappa$ B DNA appears to maintain  
401 similar conformational and dynamic states in free and bound forms.

402 The current structures also demonstrate a correlation between the p52 protein length  
403 and the conformation of the  $\kappa$ B DNA. The GRR region of the p52 protein, which was not  
404 included in any previous NF- $\kappa$ B structural studies, seems to play an important role.  
405 However, no electron density was observed for the GRR region in the current structures.  
406 Future studies are needed to fully understand the role of the GRR region in (p52:p52)-  
407 DNA complex conformation and the interaction with cofactor Bcl3.

### 408 **Binding affinity does not fully capture the transcriptional activity**

409 To determine if binding affinity is related to transcriptional activity, we measured the  
410 affinity of all complexes under equilibrium condition. Surprisingly, but consistent with our  
411 previous report (Mulero et al., 2018), we found no correlation between affinity and

412 transcriptional activity. The p52:p52 homodimer binds to MHC- $\kappa$ B with the highest affinity  
413 but it is not a transcriptional activation competent complex. Interestingly, our analysis  
414 reveals that p52:p52 homodimer uses different paths to bind  $\kappa$ B DNAs ranging from  
415 purely entropic for the natural PSeI, to exclusively enthalpic for MHC, and to mixed  
416 entropic-enthalpic for mutant A/T-centric and  $-1/+1$  swap PSeI DNAs. The entropy-  
417 driven processes are linked to faster binding kinetics: p52:p52 homodimer binds to  
418 natural G/C-centric PSeI DNA with both faster association and dissociation rates. The  
419 most populated conformation of the free G/C-centric PSeI DNA as revealed by MD  
420 simulation is similar to the one observed in the crystal structure of the complex  
421 suggesting this DNA's conformation does not undergo significant changes upon protein  
422 binding. Thus, in the complex between p52:p52 and natural G/C-centric DNA, both the  
423 DNA and protein most likely preserve their native states. This could account for the  
424 positive entropy and faster  $k_{on}$ . However, possibly protein-DNA contacts in such a  
425 complex are sub-optimal resulting in their faster dissociation. In contrast, p52:p52  
426 complexes with the mutant A/T-centric or  $-1/+1$  swapped DNAs likely involve  
427 rigidification of protein-DNA contacts, requiring some structural reorganizations in both  
428 molecules, results in more enthalpically stable complexes and slower association and  
429 dissociation rates. Combination of MD simulations and structural studies supports this  
430 model as PSeI (mutant A/T) and ( $-1/+1$  swap) DNAs undergo conformational changes  
431 from free to bound states. Our observations are consistent with other studies which  
432 showed rapid association and dissociation is favored by entropy, whereas slow  
433 association and dissociation is guided by enthalpy (Baerga-Ortiz et al., 2004).

#### 434 **Ideas and Speculation: Transcriptional regulation via kinetic discrimination**

435 Understanding transcriptional regulation has attracted many researchers since the  
436 discovery of the *lac* operon. One of the most intriguing questions scientists are working  
437 to resolve is the mechanism of transcriptional regulation by the specific DNA response  
438 elements. Affinity regulation by different target DNA sequences for a TF has long been  
439 thought to be the dominant mode of regulation imposed by such DNA sequences.  
440 Indeed, in many cases of eukaryotic transcription differential affinity has been shown to  
441 be critical (Sekiya et al., 2009). TFs are also known to bind free DNA or nucleosome with  
442 distinct kinetics (Donovan et al., 2019). But none of these studies has established a  
443 direct correlation between binding kinetics and transcriptional regulation in eukaryotes.  
444 Many biological systems have been studied in detail with the roles of binding kinetics in

445 regulation evaluated. For instance, receptor ligand interactions, T cell activation and  
446 potency of bacterial toxins are guided by the half-life of key complexes (Corzo, 2006,  
447 Gonzalez et al., 2005, Gross and Lodish, 2006, Nakajima et al., 2001).

448 Of all six  $\kappa$ B DNAs tested, the natural G/C-centric PSeI and Skp2 DNAs showed  
449 greater transcriptional activation. We found that a slower dissociation rate or longer  
450 residence time is linked to reduced transcriptional activation. Although the relationship  
451 between the dissociation rates and transcription activities is shown for only six tested  
452 binding sites, this relationship is preserved for (p52:p52)-DNA complexes and to a lesser  
453 extent for (p52:p52:Bcl3)-DNA complexes.

454 The rate constants obtained in our *in vitro* assays probably are not the same *in vivo*,  
455 where many other factors will have an impact on binding kinetics. However, the relative  
456 rates clearly suggest that the persistent presence of p52 on DNA gives rise to less  
457 transcription. Work presented here hints at a link between the DNA binding kinetics of a  
458 TF and its interaction with coactivators and corepressors. We previously showed that the  
459 p52:p52:Bcl3 complex preferentially recruits HDAC3 when it remains bound to an A/T-  
460 centric  $\kappa$ B site (Wang et al., 2012), it is possible that the slower dissociation rate or  
461 longer residence time of p52:p52:Bcl3 on the A/T-centric  $\kappa$ B site described in this study  
462 matches the slower on rate of the corepressor to p52:p52:Bcl3 bound to A/T DNA. That  
463 is, the A/T-centric  $\kappa$ B DNA:p52:p52:Bcl3 complex remains stable for long enough to give  
464 the HDAC3 corepressor complex enough time to stably interact with it. In addition, the  
465 binding of other TFs to the promoters/enhancers of target genes inevitably impacts on  
466 the coactivator/corepressor regulation by the (p52:p52)-DNA complexes. Future  
467 experiments aimed at coactivator and corepressor interaction rates within the context of  
468 chromatinized DNA are needed to verify the validity of the kinetic model for DNA  
469 element sequence-specific gene regulation.

470 In summary, our studies have revealed a novel conformation for  $\kappa$ B DNA in complex  
471 with NF- $\kappa$ B and a new organization of an NF- $\kappa$ B dimer. More importantly, our work  
472 provides a new insight into the mechanism of differential thermodynamics and kinetics of  
473 NF- $\kappa$ B-DNA binding. DNA response elements with only one or two bp variations could  
474 provoke drastically different kinetic and thermodynamic effects. Future experiments will  
475 help us fully understand how such binding processes result in transcription activation or  
476 repression.

477

478 **Materials and Methods**

479

## 480 **Protein expression and purification**

481 Recombinant non-tagged human p52 (1-398) and (1-327) was expressed and purified  
482 from *Escherichia coli* Rosetta (DE3) cells. Rosetta (DE3) cells transformed with pET-  
483 11a-p52 (1-398) or (1-327) were cultured in 2 L of LB medium containing 50 mg/mL  
484 ampicillin and 34 mg/mL chloramphenicol at 37 °C. Expression was induced with 0.2mM  
485 Isopropyl  $\beta$ -D-1-thiogalactopyranoside (IPTG) at OD<sub>600</sub> 0.5-0.6 for 3 hours. Cells were  
486 harvested by centrifugation, suspended in 40 mM Tris-HCl (pH 7.5), 100 mM NaCl, 10  
487 mM  $\beta$ -ME, 1 mM PMSF, and lysed by sonication. Cell debris was removed by  
488 centrifugation (20,000 g for 30 min). Clarified supernatant was loaded onto Q-Sepharose  
489 FF column (GE Healthcare). Flow-through fraction was applied to SP HP column (GE  
490 Healthcare). The column was washed with 40 mM Tris-HCl (pH 7.5), 200 mM NaCl; 10  
491 mM  $\beta$ -ME, and the protein was eluted by the same buffer containing 400 mM NaCl. p52  
492 was concentrated and loaded onto the gel filtration column (HiLoad 16/600 Superdex  
493 200 pg, GE Healthcare) pre-equilibrated with 10 mM Tris-HCl (pH 7.5), 100 mM NaCl; 5  
494 mM  $\beta$ -ME. Peak fractions were concentrated to ~10 mg/mL, flash frozen in liquid  
495 nitrogen and stored at -80°C. His-Bcl3 (1-446) WT and phospho-mimetic mutant was  
496 expressed in *Escherichia coli* Rosetta (DE3) cells by induction with 0.2 mM IPTG at  
497 OD<sub>600</sub> 0.4 for 8 hours at 24°C. Cell pellets of 2 L-culture of Bcl3 alone or together with 1  
498 L-culture of p52 (for p52:Bcl3 complex) were resuspended together in buffer containing  
499 20 mM Tris-HCl (pH 8.0), 300 mM NaCl, 25 mM imidazole, 10% glycerol, 10 mM  $\beta$ -ME,  
500 0.1 mM PMSF and 50 $\mu$ L protease inhibitor cocktail (Sigma) and then purified by Ni  
501 Sepharose (HisTrap HP, GE) followed by anion exchange column (Q Sepharose fast  
502 flow, GE). The protein complex further went through HiTrap Desalting Column (GE) to  
503 exchange buffer before BLI assays.

## 504 **Crystallization, data collection, and structure determination**

505 Annealed DNA duplex was mixed in 20% molar excess with the pure protein.

506 The crystals of the p52(aa 1-398):PSeI(G/C-centric) 18bp complex were obtained by  
507 the sitting-drop vapor diffusion method at 20 °C with a reservoir solution containing 0.1  
508 M sodium malonate (pH 4.0), 0.2 M CsCl and 5% (w/v) PEG 3350.

509 The crystals of the p52(aa 1-398):PSeI(A/T-centric) 18bp complex, and the p52(aa 1-  
510 398):PSeI(-1/+1 swap) 18bp complex were obtained by the sitting-drop vapor diffusion  
511 method at 20 °C with a reservoir solution containing 0.1 M sodium malonate (pH 4.0), 50  
512 mM CsCl and 2.5% (w/v) PEG 3350.

513 The crystals of the p52(aa 1-327):Psel(A/T-centric) 13bp complex were obtained by  
514 the sitting-drop vapor diffusion method at 20 °C with a reservoir solution containing 50  
515 mM MES (pH 6.0), 10 mM MgCl<sub>2</sub> and 10% (w/v) PEG 3350.

516 Before data collection, all crystals were briefly soaked in their original crystallization  
517 solution with 20% (v/v) ethylene glycol. All crystals were flash frozen in liquid nitrogen for  
518 diffraction screening and data collection at 100 K. X-ray diffraction data were collected at  
519 beamline BL19U1 at Shanghai Synchrotron Radiation Facility. The initial solution was  
520 obtained by molecular replacement using Phaser (McCoy et al., 2007) with p52-MHC  
521 DNA complex (Cramer et al., 1997) as the search model. The structure was further  
522 refined through an iterative combination of refinement with Refmac5 (Murshudov et al.,  
523 2011) and manual building in the Coot program (Emsley and Cowtan, 2004, Emsley et  
524 al., 2010). The crystallographic information is summarized in Table 1.

## 525 **MD simulation**

526 All MD simulations were carried out in GROMACS 2020.6 (Lindahl et al., 2020) with  
527 Amber14sb force field (Maier et al., 2015) and OL15 parameters for DNA (Zgarbová et  
528 al., 2015). Crystal structures of κB/κB-like DNAs were extracted from the resolved p52-  
529 bound structures, where the MHC DNA was retrieved from RCSB PDB database (PDB  
530 1A3Q) (Cramer et al., 1997). In each system, κB DNA was placed in the center of a  
531 dodecahedron box with a 12-Å margin, solvated with TIP3P water (Jorgensen et al.,  
532 1983), and ionized with 0.1 M NaCl. Energy minimization was performed until the  
533 maximum force of system was below 1,000 kJ·mol<sup>-1</sup>·nm<sup>-1</sup>. The minimized system was  
534 then equilibrated in a NVT ensemble for two 1-ns stages, positionally restraining the  
535 DNA heavy atoms with a force constant of 20,000 kJ·mol<sup>-1</sup>·nm<sup>-2</sup> and 10,000 kJ·mol<sup>-1</sup>·nm<sup>-2</sup>,  
536 respectively. Subsequently, the system was subjected to a 6-ns position-restrained  
537 NPT equilibration, with the force constant gradually reduced from 10,000 kJ·mol<sup>-1</sup>·nm<sup>-2</sup> to  
538 400 kJ·mol<sup>-1</sup>·nm<sup>-2</sup>. Finally, five replicas of 2-μs unrestrained production simulations were  
539 run for each well-equilibrated DNA system, resulting in an aggregated 10-μs trajectory  
540 for each system. In all simulations, van der Waals forces were smoothly switched to zero  
541 from 9 Å to 10 Å. Electrostatics were calculated using the particle mesh Ewald (PME)  
542 method (Darden et al., 1993) with a cutoff of 10 Å. A velocity-rescaling thermostat (Bussi  
543 et al., 2007) was employed for the temperature coupling at 300 K, whereas pressure  
544 coupling at 1 bar was implemented by a Berendsen barostat (Berendsen et al., 1984).



545 All bonds involving H atoms were constrained using the LINCS algorithm (Hess et al.,  
546 1997).

547 Occupancy of DNA was calculated over the aggregated integrated 10- $\mu$ s trajectories  
548 using the VolMap tool in VMD (Humphrey et al., 1996). The clustering analyses were  
549 conducted within GROMACS packages using GROMOS method. Representative  
550 structures of DNA and bp at position -1, 0, +1 were obtained from the centroid structures  
551 of top clusters and rendered with PyMOL (Schrodinger, 2015). The hydrogen bonds  
552 were calculated using PyMOL with default standard (heavy atom distance cutoff of 3.6 Å  
553 and angle cutoff of 63°). The bp and groove parameters were measured via Curves+  
554 (Lavery et al., 2009, Blanchet et al., 2011), with the uncertainty represented by the  
555 standard error of the mean (SEM) computed from the five replica simulations of a given  
556 system.

#### 557 **Isothermal titration calorimetry (ITC) assays**

558 ITC measurements were carried out on a MicroCal iTC200 (Malvern Inc.) at 25°C. The  
559 ITC protein sample p52 (1-398) went through desalting column (HiTrap desalting, GE  
560 Healthcare) to freshly made ITC buffer containing 20 mM Tris-HCl (pH 8.0), 100 mM  
561 NaCl, 1mM dithiothreitol (DTT). 35  $\mu$ M p52 (1-398) protein (in cell) was titrated with 300  
562  $\mu$ M DNAs (in syringe). A time interval of 150 seconds between injections was used to  
563 ensure that the titration peak returned to the baseline. The titration data were analyzed  
564 using the program Origin7.0 and fitted by the One Set of Site model.

#### 565 **Biolayer interferometry (BLI) assays**

566 The kinetic assays were performed on Octet K2 (ForteBio) instrument at 20°C with  
567 shaking at 1000 RPM. The streptavidin (SA) biosensors were used for protein-DNA  
568 interactions and were hydrated in BLI buffer containing 20 mM Tris-HCl (pH 8.0), 100  
569 mM NaCl, 1 mM DTT and 0.02% (v/v) Tween-20. All DNAs used were 20-mer in length  
570 and biotin-triethyleneglycol (TEG) labelled. The DNAs were loaded at 50 nM for 300 sec  
571 prior to baseline equilibration for 60 sec in the BLI buffer. Association of p52:p52 (aa 1-  
572 398) or p52:p52:Bcl3 complex in BLI buffer at various concentrations was carried out for  
573 400 sec prior to dissociation for 600 sec. The Ni-NTA biosensor were used for protein-  
574 protein interactions and were hydrated in BLI buffer containing 20 mM Tris-HCl (pH 8.0),  
575 200 mM NaCl, 5% glycerol, 1 mM DTT and 0.02% (v/v) Tween-20. His-tagged-Bcl3 was  
576 loaded at 500  $\mu$ g/mL for 90 sec prior to baseline equilibration for 180 sec in the BLI  
577 buffer. Association of p52 in BLI buffer at various concentrations was carried out for 240

578 sec prior to dissociation for 360 sec. All data were baseline subtracted and analyzed in  
579 ForteBio data analysis software using a global fitting to a 1:1 binding model. The  
580 experiments were done in duplicate.

### 581 **Luciferase Reporter Assays**

582 HeLa cells were transiently transfected with Flag-p52(1-415) together with Flag-Bcl3(1-  
583 446) expression vectors or empty Flag-vector, and the luciferase reporter DNA with  
584 specific  $\kappa$ B DNA promoter (Wang et al., 2012). The total amount of plasmid DNA was  
585 kept constant for all assays. Transient transfections were carried out using  
586 Lipofectamine 2000 (Invitrogen). Cells were collected 48 hours after transfection.  
587 Luciferase activity assays were performed using Dual-Luciferase Reporter Assay  
588 System (Promega) following the manufacturer's protocol. Data are represented as mean  
589 standard deviations (SD) of three independent experiments in triplicates.

### 590 **Data Availability**

591 The atomic coordinates have been deposited in the Protein Data Bank, [www.wwpdb.org](http://www.wwpdb.org)  
592 (PDB ID codes 7CLI, 7VUQ, 7VUP and 7W7L).

593

### 594 **Acknowledgments**

595

596 We thank the Proteomics, Metabolomics and Drug Development (PMDD) core at Faculty  
597 of Health Sciences for providing the ITC machine for the thermodynamic assays. We  
598 thank the staffs from BL19U1 beamline of National Facility for Protein Science in  
599 Shanghai (NFPS) at Shanghai Synchrotron Radiation Facility, for assistance during data  
600 collection. We thank Prof. Liang Tong at Columbia University for critical discussion of the  
601 manuscript. This work was supported by the Science and Technology Development  
602 Fund, Macao S.A.R. (FDCT) [project 0104/2019/A2 to V.Y.-F.W.]; the Multi-Year  
603 Research Grant from University of Macau [MYRG2018-00093-FHS to V.Y.-F.W.]. T.L.  
604 and Y.W. were supported by direct grants from the Chinese University of Hong Kong.  
605 G.G. were supported by the National Institutes of Health (NIH) [GM085490 and  
606 CA142642 to G.G.].

607 *Author Contributions:* V.Y.-F.W. designed the experiments and supervised the  
608 project. V.M. performed the complex crystallization, structure determination and  
609 refinement. W.P. carried out all the biochemistry, thermodynamic and binding kinetic  
610 studies. T.L. performed MD simulation. V.M., W.P., T.L., Y.W., G.G. and V.Y.-F.W.  
611 analyzed the data. V.Y.-F.W., G.G., W.Y. and T.L. wrote the paper.

612 **Declaration of interests**

613 The authors declare no competing interests.

614

## 615 **Figures Legends**

616 **Figure 1.** Crystal structures of p52:p52 homodimer in complex with Psel-κB DNA  
617 variants reveal distinct signatures. (A) The natural G/C-centric Psel luciferase reporter  
618 was activated by endogenous NF-κB with LPS stimulation and Bcl3 co-expression. The  
619 data were analyzed from three independent experiments performed in triplicate. RLU,  
620 relative luciferase unit. \*p<0.05; \*\*p<0.01 (t test). Error bars represent standard deviation  
621 (SD). (B) Luciferase reporter activity driven by co-expression of p52 and Bcl3 was  
622 reduced when the natural G/C-centric Psel site was mutated to A/T-centric or -1/+1  
623 swap sites; and the MHC luciferase reporter was not activated by p52:p52:Bcl3 complex.  
624 The data were analyzed from three independent experiments performed in triplicate.  
625 \*p<0.05; \*\*p<0.01; \*\*\*p<0.001; n.s., not significant (t test). Error bars represent SD. (C)  
626 Overall structure of p52:p52 in complex with the natural G/C-centric Psel-κB DNA. (Left)  
627 Ribbon diagram showing the entire complex viewed down the DNA helical axis. The two  
628 p52 monomers are shown in orange (monomer I) and green (monomer II), respectively;  
629 and the DNA duplex is shown in blue; (Right) View of the complex after rotating 90°  
630 along the vertical axis. (D) Overlay p52:p52 homodimers in three Psel-κB DNA variants  
631 by their dimerization domain (DD). Monomer I is shown in tv\_orange, bright orange and  
632 light orange; monomer II is shown in forest, tv\_green and lime in the natural G/C-centric,  
633 mutant A/T-centric and -1/+1 swap complexes. All three structures are presented as  
634 backbone traces. (E-G) Structure of the 18bp Psel-κB DNAs with (E) natural G/C-centric  
635 (blue), (F) mutant A/T-centric (light pink) and (G) -1/+1 swap (ruby). The DNA bps as  
636 observed in the co-crystal structures are shown in filled sticks. The view is onto the  
637 central minor groove. The nucleotide sequences used in co-crystallization are shown at  
638 the bottom, with κB DNA underlined and numbering scheme indicated above; the central  
639 position 0 is highlighted in red, and the swap of -1 and +1 positions is highlighted in  
640 green. (H) Overlay of natural G/C-centric, mutant A/T-centric, and -1/+1 swap Psel-κB  
641 DNAs in (E-G). (I) Table showing minor groove widths and major groove depths (Å); the  
642 ideal B-form DNA was built using Coot program (Emsley and Cowtan, 2004, Emsley et  
643 al., 2010) based on the sequence of Psel-κB DNA. The minor groove widths at the  
644 central region from position -1 to +1 are shown in red, and the corresponding major  
645 groove depths are shown in green. Geometrical parameters and the helical axes were  
646 calculated with Curves+ (Blanchet et al., 2011, Lavery et al., 2009).

647 **Figure 2.** p52:p52 dimer conformations. (A) (Left) Overlay of p52:p52 (aa 1-398) in  
648 complex with the 18bp natural G/C-centric Psel-κB DNA (PDB 7CLI, this study)(in

649 orange and green for monomer I and II, respectively) and p52:p52 (aa 35-329) in  
650 complex with the MHC- $\kappa$ B DNA (PDB 1A3Q)(in gray). Diagram explains rigid-body  
651 movement of the NTD. (Right) View of the complex after rotating 90° along the horizontal  
652 axis. Both protein structures are presented as backbone traces. (B) Overlay of the short  
653 p52:p52 (aa 1-327) in complex with the 13bp PSeI(mutant A/T)- $\kappa$ B DNA (PDB 7W7L,  
654 this study)(in yelloworange and purpleblue for monomer I and II, respectively) and  
655 p52:p52 (aa 35-329) in complex with the MHC- $\kappa$ B DNA (PDB 1A3Q)(in gray). (C)  
656 Conformational differences between two p52 monomers in complex with the 18bp  
657 natural G/C-centric PSeI- $\kappa$ B DNA (PDB 7CLI, this study) are shown by superposing their  
658 DDs. The two monomers are presented as backbone traces. (D) Hydrogen bonding  
659 network at the interdomain interface between DD and NTD in each p52 monomer. In  
660 monomer I, the two domains form contacts with each other through a wide network of H-  
661 bonds between the side chains of Arg49 from the NTD and Gly224, Ser226, Arg311 and  
662 Asp316 from the DD; whereas in monomer II, there are only contacts between Arg49  
663 and Ala225, as well as Ser226 and Arg311.

664 **Figure 3.** Protein-DNA contacts. (A) Arg52 of p52 in the PSeI- $\kappa$ B complex (PDB 7CLI,  
665 this study) only makes base-specific contacts with G at +3 position. (B) The  
666 corresponding Arg54 of p50 in the p50:RelA-IFN $\beta$ - $\kappa$ B complex (PDB 1LE5) makes base-  
667 specific contacts with A at -2 and G at -3 positions as well as additional cross-strand  
668 contacts with T at -2 position. (C) DNA based-specific contacts made by Arg52, Arg54,  
669 His62 and Lys221 of p52 (Left) monomer I and (Right) monomer II in complex with the  
670 natural PSeI- $\kappa$ B DNA. H-bonds are indicated as red dotted lines with distances labelled.  
671 Noted that Lys221 in monomer II is in a different conformation and has no specific  
672 contacts with DNA. (D) DNA backbone contacts made by Lys143 of p52 (Left) monomer  
673 I and (Right) monomer II. (E) Sequence alignment showing the unique basic segment in  
674 p52 among all NF- $\kappa$ B family members. Both human and mouse sequences of the p52  
675 subunit are shown. Only human sequences are shown for the rest of the family  
676 members. Secondary structures and connecting loops are drawn above the sequences.  
677 (F) (Left) The unique basic segment in p52 NTD helix  $\alpha$ 2 interacts with PSeI- $\kappa$ B DNA in  
678 the present structure (PDB 7CLI, this study); (Right) these interactions are absent in p50  
679 subunit in the p50:RelA-IFN $\beta$ - $\kappa$ B complex (PDB 1LE5).

680 **Figure 4.** MD simulations for free  $\kappa$ B DNAs. (A-B) Statistical MGW over the aggregated  
681 10- $\mu$ s simulations of each system at (A) the central 0 position (averaged over the five

682 levels from  $-1$  to  $+1$  positions) and (B) the  $+1$  position (averaged over the five levels from  
683  $0$  to  $+2$  positions). (Upper) DNA isosurface at  $0.2$  isovalue ( $20\%$  occupancy); (Lower)  
684 Probability distribution of MGW. Dashed lines show the MGW in the (p52:p52)-bound  
685 crystal structures. (C) Representative structures of natural G/C-centric, mutant A/T-  
686 centric,  $-1/+1$  swap PSeI- $\kappa$ B DNAs and MHC- $\kappa$ B DNA revealed from MD simulations.  
687 (Left) Superimposed structures showing the narrowed central minor groove on  $-1/+1$   
688 swap DNAs; (Right) Representative conformations of bps at  $-1$ ,  $0$  and  $+1$  positions  
689 revealed from MD simulations. MGW was calculated with Curves+ (Blanchet et al., 2011,  
690 Lavery et al., 2009).

691 **Figure 5.** p52 binds  $\kappa$ B DNAs with different thermodynamic features. (A-D) Calorimetric  
692 titration data showing the binding of recombinant p52:p52 (aa 1-398) homodimer with (A)  
693 natural G/C-centric, (B) mutant A/T-centric, (C)  $-1/+1$  swap PSeI- $\kappa$ B and (D) MHC- $\kappa$ B  
694 DNAs. The top panel of the ITC figures represent the binding isotherms; the bottom  
695 panel shows the integrated heat of the reaction and the line represents the best fit to the  
696 data according to a single-site binding model. The determined  $K_d$ , changes of enthalpy  
697 and entropy are shown on the bottom panel.

698 **Figure 6.** p52 binds the natural transcriptionally active G/C-centric PSeI- $\kappa$ B DNA with  
699 faster kinetics. (A-D) Biolayer interferometry (BLI) binding analysis of p52:p52 (aa 1-398)  
700 homodimer to immobilized biotin labeled (A) natural G/C-centric, (B) mutant A/T-centric,  
701 (C)  $-1/+1$  swap PSeI- $\kappa$ B and (D) MHC- $\kappa$ B DNAs. The differences in  $k_{on}$  and  $k_{off}$  can be  
702 seen in the shapes of the association and dissociation curves. Each experiment was  
703 done in duplicate and one representative set of curves is shown. (E) Table showing the  
704 kinetic analysis in (A-D). (F-I) BLI binding analysis of p52:p52:Bcl3 complex to  
705 immobilized biotin labeled (F) natural G/C-centric, (G) mutant A/T-centric, (H)  $-1/+1$   
706 swap PSeI- $\kappa$ B and (I) MHC- $\kappa$ B DNAs. Each experiment was done in duplicate and one  
707 representative set of curves is shown. (J) Table showing the kinetic analysis in (F-I). (K)  
708 Table summarizing the fold change of  $K_d$ ,  $k_{on}$  and  $k_{off}$  with respect to the more  
709 transcriptionally active G/C-centric PSeI- $\kappa$ B DNA. The average values of the duplicated  
710 kinetics data in (A-J) and the relative reporter activities in RLU from Fig. 1A-B were used  
711 for ratio calculations. The numbers for the greater reporter active G/C-centric PSeI are  
712 shown in blue.

713 **Table 1. Summary of crystallographic information.**

714 **References**

- 715
- 716 ANNUNZIATA, C. M., DAVIS, R. E., DEMCHENKO, Y., BELLAMY, W., GABREA, A.,  
717 ZHAN, F., LENZ, G., HANAMURA, I., WRIGHT, G., XIAO, W., DAVE, S., HURT,  
718 E. M., TAN, B., ZHAO, H., STEPHENS, O., SANTRA, M., WILLIAMS, D. R.,  
719 DANG, L., BARLOGIE, B., SHAUGHNESSY, J. D., JR., KUEHL, W. M. &  
720 STAUDT, L. M. 2007. Frequent engagement of the classical and alternative NF-  
721 kappaB pathways by diverse genetic abnormalities in multiple myeloma. *Cancer*  
722 *Cell*, 12, 115-30.
- 723 BAERGA-ORTIZ, A., BERGQVIST, S., MANDELL, J. G. & KOMIVES, E. A. 2004. Two  
724 different proteins that compete for binding to thrombin have opposite kinetic and  
725 thermodynamic profiles. *Protein Sci*, 13, 166-76.
- 726 BARBIĆ, A., ZIMMER, D. P. & CROTHERS, D. M. 2003. Structural origins of adenine-  
727 tract bending. *Proceedings of the National Academy of Sciences*, 100, 2369-  
728 2373.
- 729 BARRE, B. & PERKINS, N. D. 2007. A cell cycle regulatory network controlling NF-  
730 kappaB subunit activity and function. *EMBO J*, 26, 4841-55.
- 731 BERENDSEN, H. J. C., POSTMA, J. P. M., GUNSTEREN, W. F. V., DINOLA, A. &  
732 HAAK, J. R. 1984. Molecular dynamics with coupling to an external bath. *The*  
733 *Journal of Chemical Physics*, 81, 3684-3690.
- 734 BERKOWITZ, B., HUANG, D. B., CHEN-PARK, F. E., SIGLER, P. B. & GHOSH, G.  
735 2002. The x-ray crystal structure of the NF-kappa B p50.p65 heterodimer bound  
736 to the interferon beta -kappa B site. *J Biol Chem*, 277, 24694-700.
- 737 BLANCHET, C., PASI, M., ZAKRZEWSKA, K. & LAVERY, R. 2011. CURVES+ web  
738 server for analyzing and visualizing the helical, backbone and groove parameters  
739 of nucleic acid structures. *Nucleic Acids Res*, 39, W68-73.
- 740 BOURS, V., FRANZOSO, G., AZARENKO, V., PARK, S., KANNO, T., BROWN, K. &  
741 SIEBENLIST, U. 1993. The oncoprotein Bcl-3 directly transactivates through  
742 kappa B motifs via association with DNA-binding p50B homodimers. *Cell*, 72,  
743 729-39.
- 744 BUSSI, G., DONADIO, D. & PARRINELLO, M. 2007. Canonical sampling through  
745 velocity rescaling. *J Chem Phys*, 126, 014101.
- 746 CHEN, F. E. & GHOSH, G. 1999. Regulation of DNA binding by Rel/NF-kappaB  
747 transcription factors: structural views. *Oncogene*, 18, 6845-52.
- 748 CHEN, F. E., HUANG, D. B., CHEN, Y. Q. & GHOSH, G. 1998a. Crystal structure of  
749 p50/p65 heterodimer of transcription factor NF-kappaB bound to DNA. *Nature*,  
750 391, 410-3.
- 751 CHEN, Y. Q., GHOSH, S. & GHOSH, G. 1998b. A novel DNA recognition mode by the  
752 NF-kappa B p65 homodimer. *Nat Struct Biol*, 5, 67-73.
- 753 CHEN, Y. Q., SENGCHANTHALANGSY, L. L., HACKETT, A. & GHOSH, G. 2000. NF-  
754 kappaB p65 (RelA) homodimer uses distinct mechanisms to recognize DNA  
755 targets. *Structure Fold Des*, 8, 419-28.
- 756 CHEN-PARK, F. E., HUANG, D. B., NORO, B., THANOS, D. & GHOSH, G. 2002. The  
757 kappa B DNA sequence from the HIV long terminal repeat functions as an  
758 allosteric regulator of HIV transcription. *J Biol Chem*, 277, 24701-8.
- 759 CHENG, C. S., FELDMAN, K. E., LEE, J., VERMA, S., HUANG, D. B., HUYNH, K.,  
760 CHANG, M., PONOMARENKO, J. V., SUN, S. C., BENEDICT, C. A., GHOSH,  
761 G. & HOFFMANN, A. 2011. The specificity of innate immune responses is  
762 enforced by repression of interferon response elements by NF-kappaB p50. *Sci*  
763 *Signal*, 4, ra11.



- 764 CORZO, J. 2006. Time, the forgotten dimension of ligand binding teaching. *Biochem Mol*  
765 *Biol Educ*, 34, 413-6.
- 766 COURTOIS, G. & GILMORE, T. D. 2006. Mutations in the NF-kappaB signaling  
767 pathway: implications for human disease. *Oncogene*, 25, 6831-43.
- 768 CRAMER, P., LARSON, C. J., VERDINE, G. L. & MULLER, C. W. 1997. Structure of the  
769 human NF-kappaB p52 homodimer-DNA complex at 2.1 A resolution. *EMBO J*,  
770 16, 7078-90.
- 771 DARDEN, T., YORK, D. & PEDERSEN, L. 1993. Particle Mesh Ewald - an N.Log(N)  
772 Method for Ewald Sums in Large Systems. *Journal of Chemical Physics*, 98,  
773 10089-10092.
- 774 DONOVAN, B. T., CHEN, H., JIPA, C., BAI, L. & POIRIER, M. G. 2019. Dissociation rate  
775 compensation mechanism for budding yeast pioneer transcription factors. *Elife*,  
776 8.
- 777 EMSLEY, P. & COWTAN, K. 2004. Coot: model-building tools for molecular graphics.  
778 *Acta Crystallogr D Biol Crystallogr*, 60, 2126-32.
- 779 EMSLEY, P., LOHKAMP, B., SCOTT, W. G. & COWTAN, K. 2010. Features and  
780 development of Coot. *Acta Crystallogr D Biol Crystallogr*, 66, 486-501.
- 781 ESCALANTE, C. R., SHEN, L., THANOS, D. & AGGARWAL, A. K. 2002. Structure of  
782 NF-kappaB p50/p65 heterodimer bound to the PRDII DNA element from the  
783 interferon-beta promoter. *Structure*, 10, 383-91.
- 784 FUSCO, A. J., HUANG, D. B., MILLER, D., WANG, V. Y., VU, D. & GHOSH, G. 2009.  
785 NF-kappaB p52:RelB heterodimer recognizes two classes of kappaB sites with  
786 two distinct modes. *EMBO Rep*, 10, 152-9.
- 787 GARVIE, C. W. & WOLBERGER, C. 2001. Recognition of specific DNA sequences. *Mol*  
788 *Cell*, 8, 937-46.
- 789 GHOSH, G., VAN DUYNE, G., GHOSH, S. & SIGLER, P. B. 1995. Structure of NF-  
790 kappa B p50 homodimer bound to a kappa B site. *Nature*, 373, 303-10.
- 791 GHOSH, G., WANG, V. Y., HUANG, D. B. & FUSCO, A. 2012. NF-kappaB regulation:  
792 lessons from structures. *Immunol Rev*, 246, 36-58.
- 793 GONZALEZ, P. A., CARRENO, L. J., COOMBS, D., MORA, J. E., PALMIERI, E.,  
794 GOLDSTEIN, B., NATHENSON, S. G. & KALERGIS, A. M. 2005. T cell receptor  
795 binding kinetics required for T cell activation depend on the density of cognate  
796 ligand on the antigen-presenting cell. *Proc Natl Acad Sci U S A*, 102, 4824-9.
- 797 GROSS, A. W. & LODISH, H. F. 2006. Cellular trafficking and degradation of  
798 erythropoietin and novel erythropoiesis stimulating protein (NESP). *J Biol Chem*,  
799 281, 2024-32.
- 800 HAYASHI, M., NAKASHIMA, T., TANIGUCHI, M., KODAMA, T., KUMANOGOH, A. &  
801 TAKAYANAGI, H. 2012. Osteoprotection by semaphorin 3A. *Nature*, 485, 69-74.
- 802 HESS, B., BEKKER, H., BERENDSEN, H. J. C. & FRAAIJE, J. G. E. M. 1997. LINCS: A  
803 linear constraint solver for molecular simulations. *Journal of Computational*  
804 *Chemistry*, 18, 1463-1472.
- 805 HOFFMANN, A., LEUNG, T. H. & BALTIMORE, D. 2003. Genetic analysis of NF-  
806 kappaB/Rel transcription factors defines functional specificities. *Embo J*, 22,  
807 5530-9.
- 808 HUANG, D. B., CHEN, Y. Q., RUETSCHKE, M., PHELPS, C. B. & GHOSH, G. 2001. X-  
809 ray crystal structure of proto-oncogene product c-Rel bound to the CD28  
810 response element of IL-2. *Structure (Camb)*, 9, 669-78.
- 811 HUANG, D. B., PHELPS, C. B., FUSCO, A. J. & GHOSH, G. 2005. Crystal structure of a  
812 free kappaB DNA: insights into DNA recognition by transcription factor NF-  
813 kappaB. *J Mol Biol*, 346, 147-60.

- 814 HUMPHREY, W., DALKE, A. & SCHULTEN, K. 1996. VMD: visual molecular dynamics.  
815 *J Mol Graph*, 14, 33-8, 27-8.
- 816 JORGENSEN, W. L., CHANDRASEKHAR, J., MADURA, J. D., IMPEY, R. W. & KLEIN,  
817 M. L. 1983. Comparison of Simple Potential Functions for Simulating Liquid  
818 Water. *Journal of Chemical Physics*, 79, 926-935.
- 819 KEATS, J. J., FONSECA, R., CHESI, M., SCHOP, R., BAKER, A., CHNG, W. J., VAN  
820 WIER, S., TIEDEMANN, R., SHI, C. X., SEBAG, M., BRAGGIO, E., HENRY, T.,  
821 ZHU, Y. X., FOGLE, H., PRICE-TROSKA, T., AHMANN, G., MANCINI, C.,  
822 BRENTS, L. A., KUMAR, S., GREIPP, P., DISPENZIERI, A., BRYANT, B.,  
823 MULLIGAN, G., BRUHN, L., BARRETT, M., VALDEZ, R., TRENT, J.,  
824 STEWART, A. K., CARPTEN, J. & BERGSAGEL, P. L. 2007. Promiscuous  
825 mutations activate the noncanonical NF-kappaB pathway in multiple myeloma.  
826 *Cancer Cell*, 12, 131-44.
- 827 KONTGEN, F., GRUMONT, R. J., STRASSER, A., METCALF, D., LI, R., TARLINTON,  
828 D. & GERONDAKIS, S. 1995. Mice lacking the c-rel proto-oncogene exhibit  
829 defects in lymphocyte proliferation, humoral immunity, and interleukin-2  
830 expression. *Genes Dev*, 9, 1965-77.
- 831 LAVERY, R., MOAKHER, M., MADDOCKS, J. H., PETKEVICIUTE, D. &  
832 ZAKRZEWSKA, K. 2009. Conformational analysis of nucleic acids revisited:  
833 Curves+. *Nucleic Acids Res*, 37, 5917-29.
- 834 LENARDO, M. J. & BALTIMORE, D. 1989. NF-kappa B: a pleiotropic mediator of  
835 inducible and tissue-specific gene control. *Cell*, 58, 227-9.
- 836 LEUNG, T. H., HOFFMANN, A. & BALTIMORE, D. 2004. One nucleotide in a kappaB  
837 site can determine cofactor specificity for NF-kappaB dimers. *Cell*, 118, 453-64.
- 838 LIM, C. A., YAO, F., WONG, J. J., GEORGE, J., XU, H., CHIU, K. P., SUNG, W. K.,  
839 LIPOVICH, L., VEGA, V. B., CHEN, J., SHAHAB, A., ZHAO, X. D., HIBBERD,  
840 M., WEI, C. L., LIM, B., NG, H. H., RUAN, Y. & CHIN, K. C. 2007. Genome-wide  
841 mapping of RELA(p65) binding identifies E2F1 as a transcriptional activator  
842 recruited by NF-kappaB upon TLR4 activation. *Mol Cell*, 27, 622-35.
- 843 LINDAHL, E., ABRAHAM, M., HESS, B. & SPOEL, D. V. D. 2020. GROMACS 2020.6  
844 Manual.
- 845 MAIER, J. A., MARTINEZ, C., KASAVAJHALA, K., WICKSTROM, L., HAUSER, K. E. &  
846 SIMMERLING, C. 2015. ff14SB: Improving the Accuracy of Protein Side Chain  
847 and Backbone Parameters from ff99SB. *Journal of Chemical Theory and  
848 Computation*, 11, 3696-3713.
- 849 MARKGREN, P. O., SCHAAL, W., HAMALAINEN, M., KARLEN, A., HALLBERG, A.,  
850 SAMUELSSON, B. & DANIELSON, U. H. 2002. Relationships between structure  
851 and interaction kinetics for HIV-1 protease inhibitors. *J Med Chem*, 45, 5430-9.
- 852 MARTONE, R., EUSKIRCHEN, G., BERTONE, P., HARTMAN, S., ROYCE, T. E.,  
853 LUSCOMBE, N. M., RINN, J. L., NELSON, F. K., MILLER, P., GERSTEIN, M.,  
854 WEISSMAN, S. & SNYDER, M. 2003. Distribution of NF-kappaB-binding sites  
855 across human chromosome 22. *Proc Natl Acad Sci U S A*, 100, 12247-52.
- 856 MCCOY, A. J., GROSSE-KUNSTLEVE, R. W., ADAMS, P. D., WINN, M. D., STORONI,  
857 L. C. & READ, R. J. 2007. Phaser crystallographic software. *J Appl Crystallogr*,  
858 40, 658-674.
- 859 MOORTHY, A. K., HUANG, D. B., WANG, V. Y., VU, D. & GHOSH, G. 2007. X-ray  
860 Structure of a NF-kappaB p50/RelB/DNA Complex Reveals Assembly of Multiple  
861 Dimers on Tandem kappaB Sites. *J Mol Biol*.
- 862 MULERO, M. C., SHAHABI, S., KO, M. S., SCHIFFER, J. M., HUANG, D. B., WANG, V.  
863 Y., AMARO, R. E., HUXFORD, T. & GHOSH, G. 2018. Protein Cofactors Are

864 Essential for High-Affinity DNA Binding by the Nuclear Factor kappaB RelA  
865 Subunit. *Biochemistry*, 57, 2943-2957.

866 MULERO, M. C., WANG, V. Y., HUXFORD, T. & GHOSH, G. 2019. Genome reading by  
867 the NF-kappaB transcription factors. *Nucleic Acids Res*, 47, 9967-9989.

868 MULLER, C. W., REY, F. A., SODEOKA, M., VERDINE, G. L. & HARRISON, S. C.  
869 1995. Structure of the NF-kappa B p50 homodimer bound to DNA. *Nature*, 373,  
870 311-7.

871 MURSHUDOV, G. N., SKUBAK, P., LEBEDEV, A. A., PANNU, N. S., STEINER, R. A.,  
872 NICHOLLS, R. A., WINN, M. D., LONG, F. & VAGIN, A. A. 2011. REFMAC5 for  
873 the refinement of macromolecular crystal structures. *Acta Crystallogr D Biol*  
874 *Crystallogr*, 67, 355-67.

875 NAKAJIMA, H., KIYOKAWA, N., KATAGIRI, Y. U., TAGUCHI, T., SUZUKI, T., SEKINO,  
876 T., MIMORI, K., EBATA, T., SAITO, M., NAKAO, H., TAKEDA, T. & FUJIMOTO,  
877 J. 2001. Kinetic analysis of binding between Shiga toxin and receptor glycolipid  
878 Gb3Cer by surface plasmon resonance. *J Biol Chem*, 276, 42915-22.

879 NATOLI, G., SACCANI, S., BOSISIO, D. & MARAZZI, I. 2005. Interactions of NF-  
880 kappaB with chromatin: the art of being at the right place at the right time. *Nat*  
881 *Immunol*, 6, 439-45.

882 PAN, J. & MCEVER, R. P. 1995. Regulation of the human P-selectin promoter by Bcl-3  
883 and specific homodimeric members of the NF-kappa B/Rel family. *J Biol Chem*,  
884 270, 23077-83.

885 PANNE, D., MANIATIS, T. & HARRISON, S. C. 2007. An atomic model of the interferon-  
886 beta enhanceosome. *Cell*, 129, 1111-23.

887 SCHRODINGER, LLC 2015. The PyMOL Molecular Graphics System, Version 2.0.

888 SEKIYA, T., MUTHURAJAN, U. M., LUGER, K., TULIN, A. V. & ZARET, K. S. 2009.  
889 Nucleosome-binding affinity as a primary determinant of the nuclear mobility of  
890 the pioneer transcription factor FoxA. *Genes Dev*, 23, 804-9.

891 SIGGERS, T., CHANG, A. B., TEIXEIRA, A., WONG, D., WILLIAMS, K. J., AHMED, B.,  
892 RAGOUSSIS, J., UDALOVA, I. A., SMALE, S. T. & BULYK, M. L. 2011.  
893 Principles of dimer-specific gene regulation revealed by a comprehensive  
894 characterization of NF-kappaB family DNA binding. *Nat Immunol*, 13, 95-102.

895 WANG, V. Y., HUANG, W., ASAGIRI, M., SPANN, N., HOFFMANN, A., GLASS, C. &  
896 GHOSH, G. 2012. The transcriptional specificity of NF-kappaB dimers is coded  
897 within the kappaB DNA response elements. *Cell Rep*, 2, 824-39.

898 WANG, V. Y., LI, Y., KIM, D., ZHONG, X., DU, Q., GHASSEMIAN, M. & GHOSH, G.  
899 2017. Bcl3 Phosphorylation by Akt, Erk2, and IKK Is Required for Its  
900 Transcriptional Activity. *Mol Cell*, 67, 484-497 e5.

901 ZGARBOVÁ, M., ŠPONER, J., OTYEPKA, M., CHEATHAM, T. E., GALINDO-MURILLO,  
902 R. & JUREČKA, P. 2015. Refinement of the Sugar-Phosphate Backbone Torsion  
903 Beta for AMBER Force Fields Improves the Description of Z- and B-DNA. *Journal*  
904 *of Chemical Theory and Computation*, 11, 5723-5736.

905 ZHANG, Q., LENARDO, M. J. & BALTIMORE, D. 2017. 30 Years of NF-kappaB: A  
906 Blossoming of Relevance to Human Pathobiology. *Cell*, 168, 37-57.

907 ZHAO, B., BARRERA, L. A., ERSING, I., WILLOX, B., SCHMIDT, S. C., GREENFELD,  
908 H., ZHOU, H., MOLLO, S. B., SHI, T. T., TAKASAKI, K., JIANG, S., CAHIR-  
909 MCFARLAND, E., KELLIS, M., BULYK, M. L., KIEFF, E. & GEWURZ, B. E.  
910 2014. The NF-kappaB genomic landscape in lymphoblastoid B cells. *Cell Rep*, 8,  
911 1595-606.  
912

**A**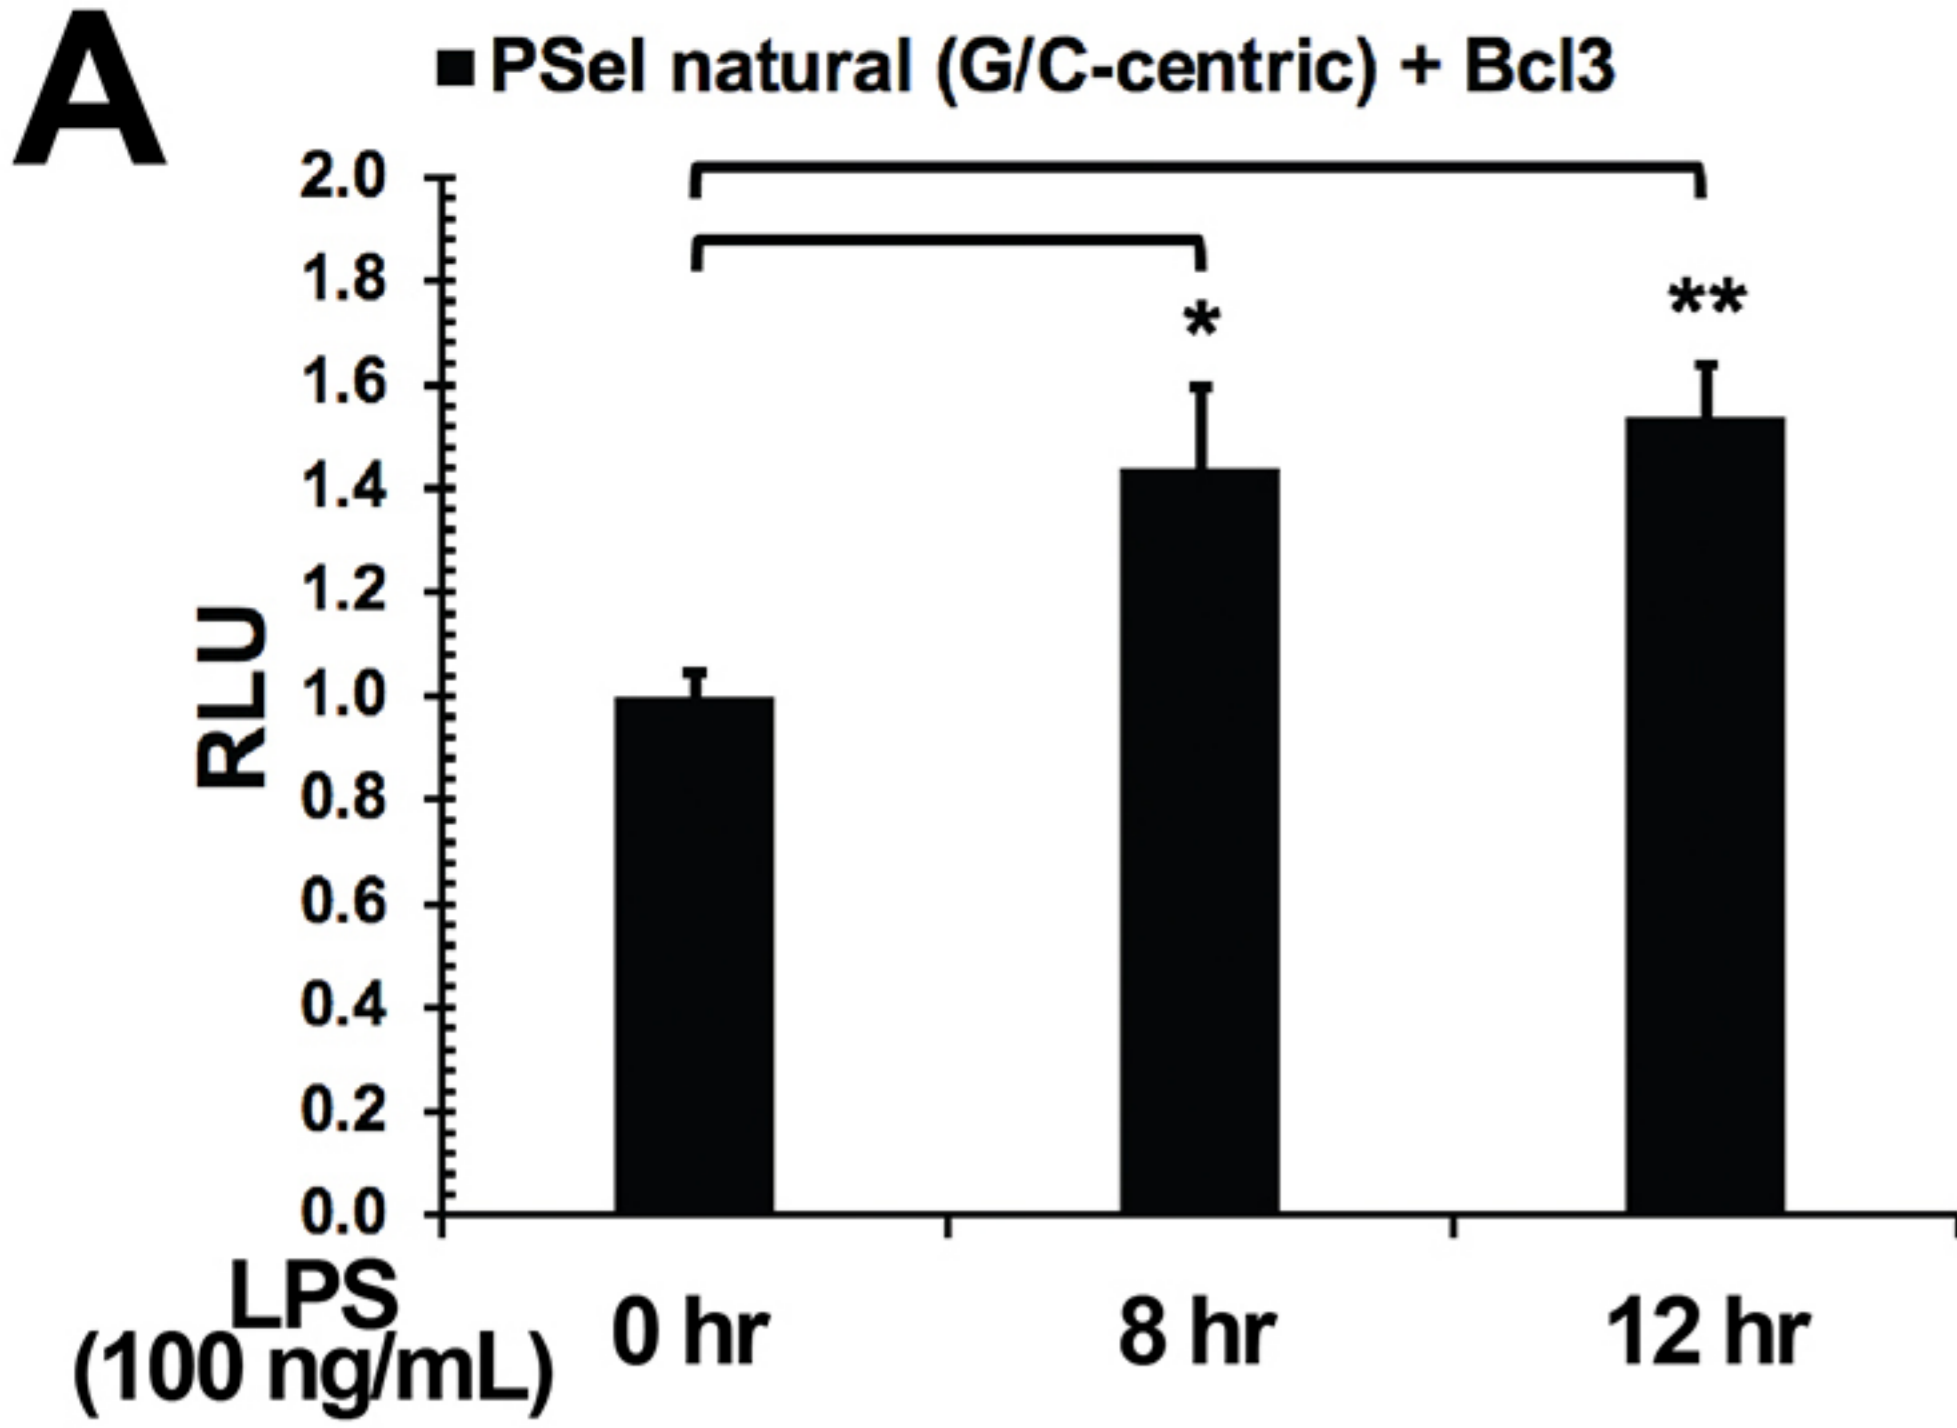**B**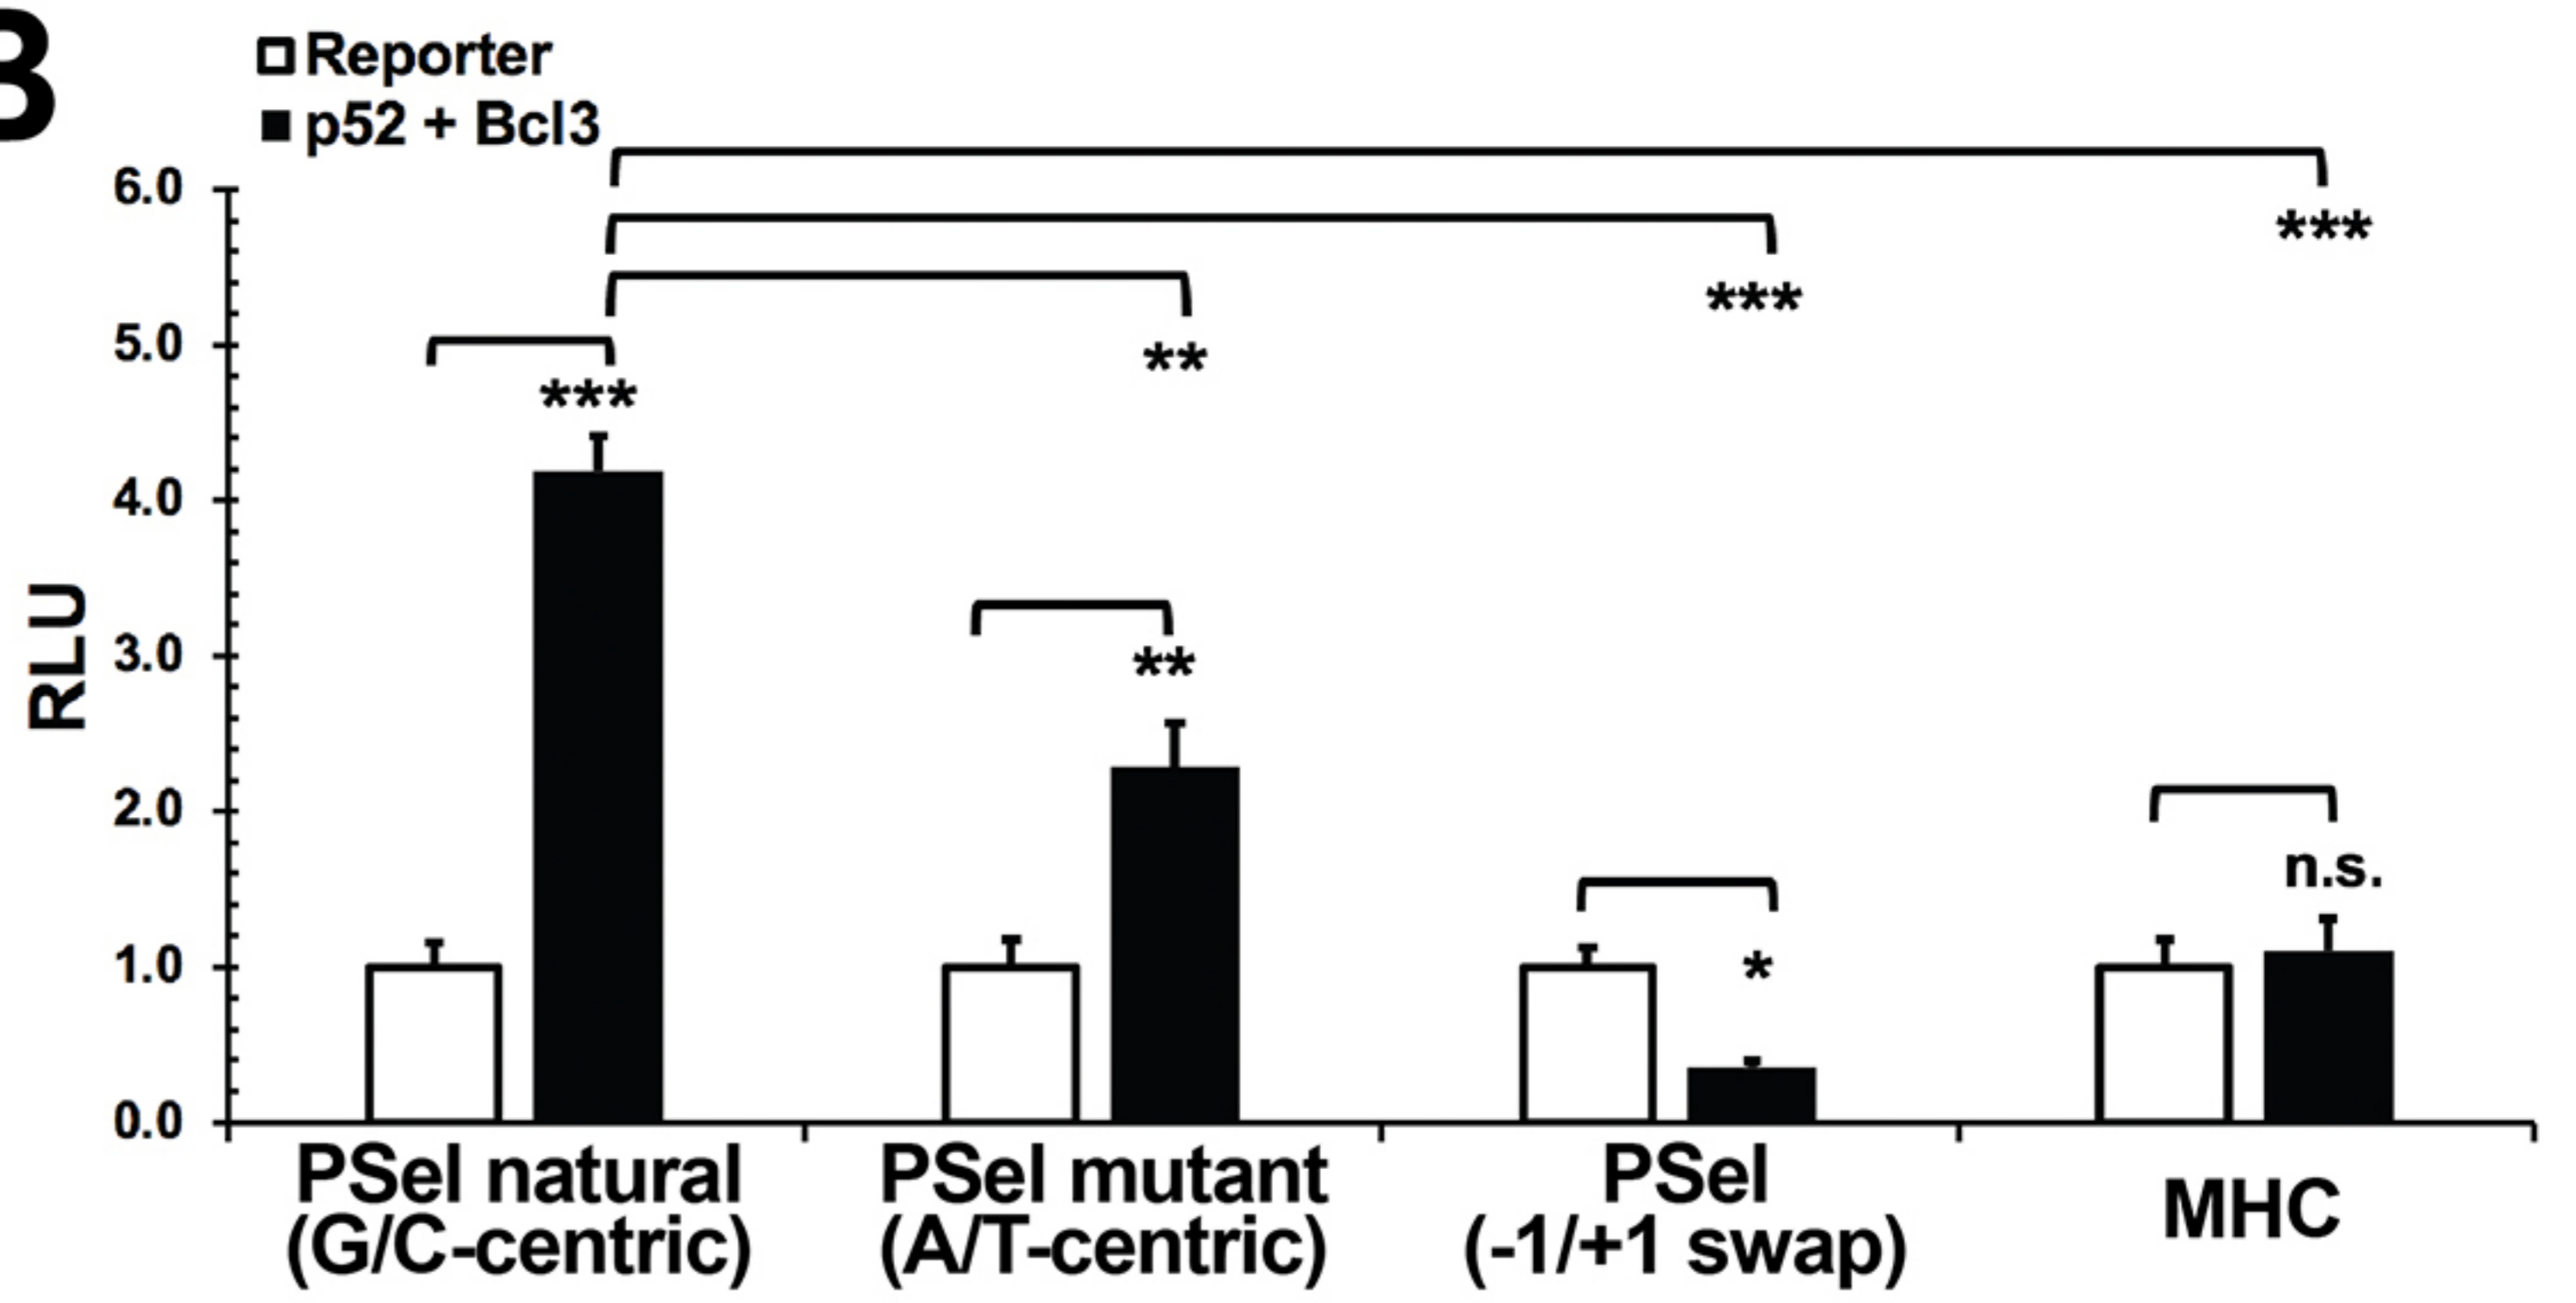**C**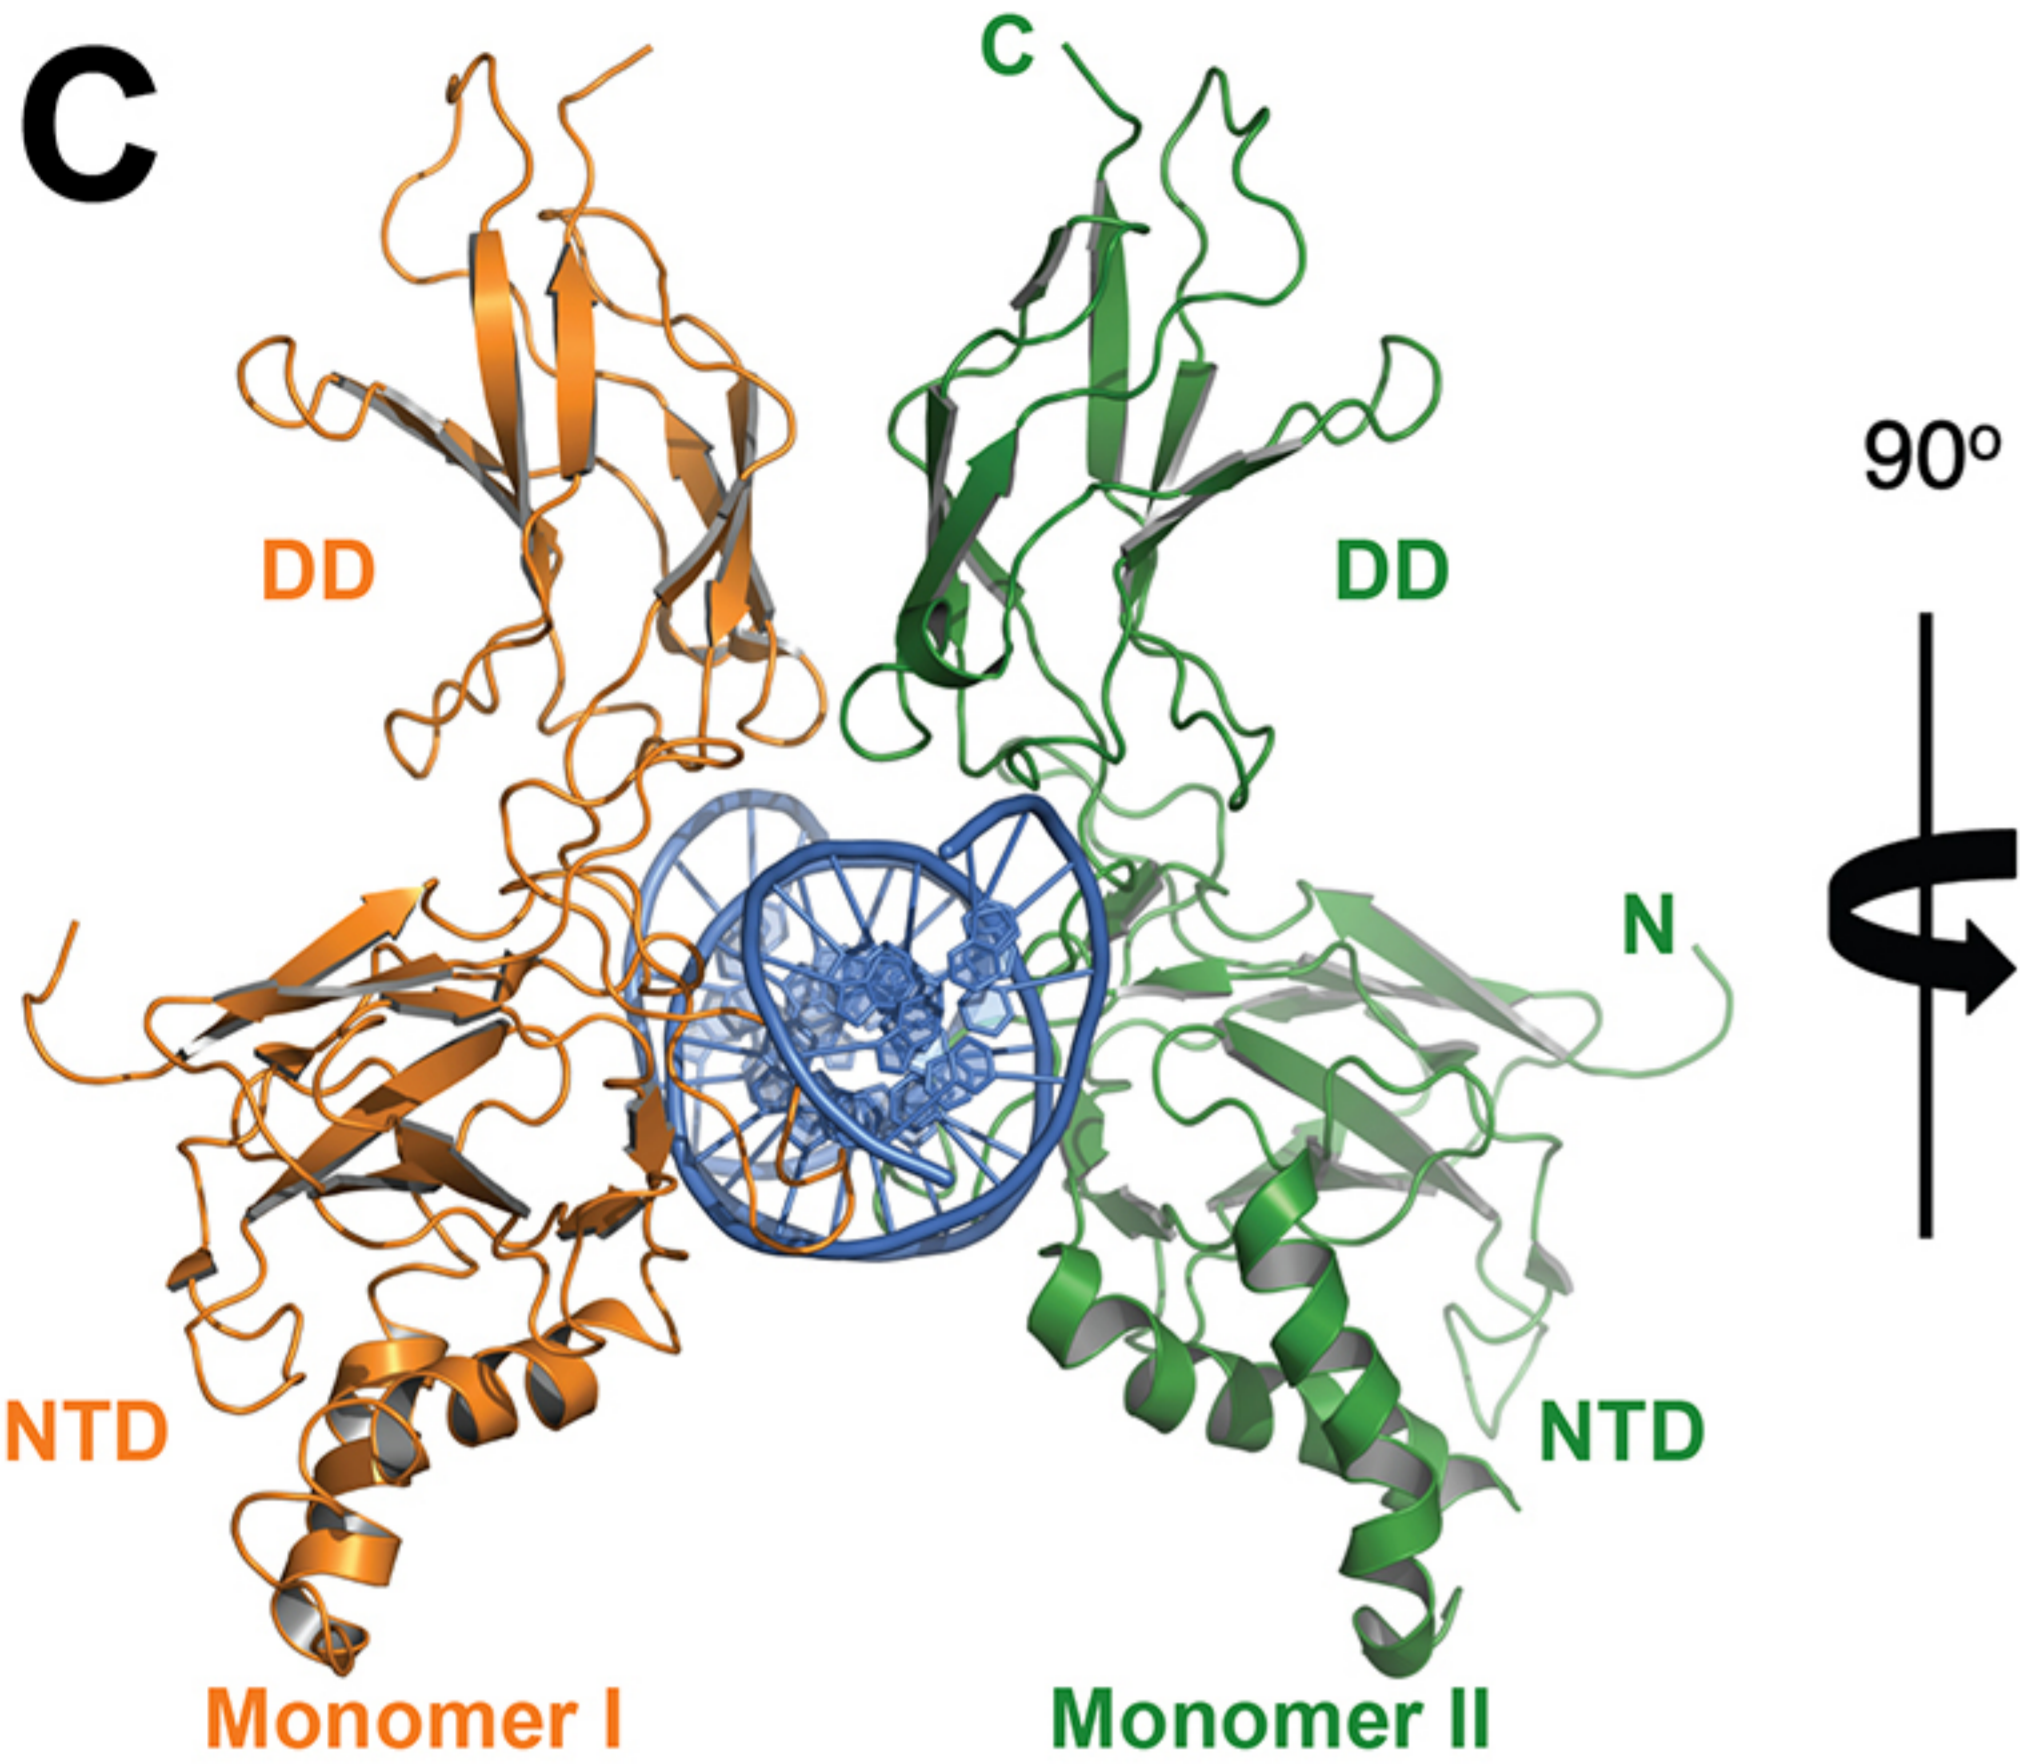**D**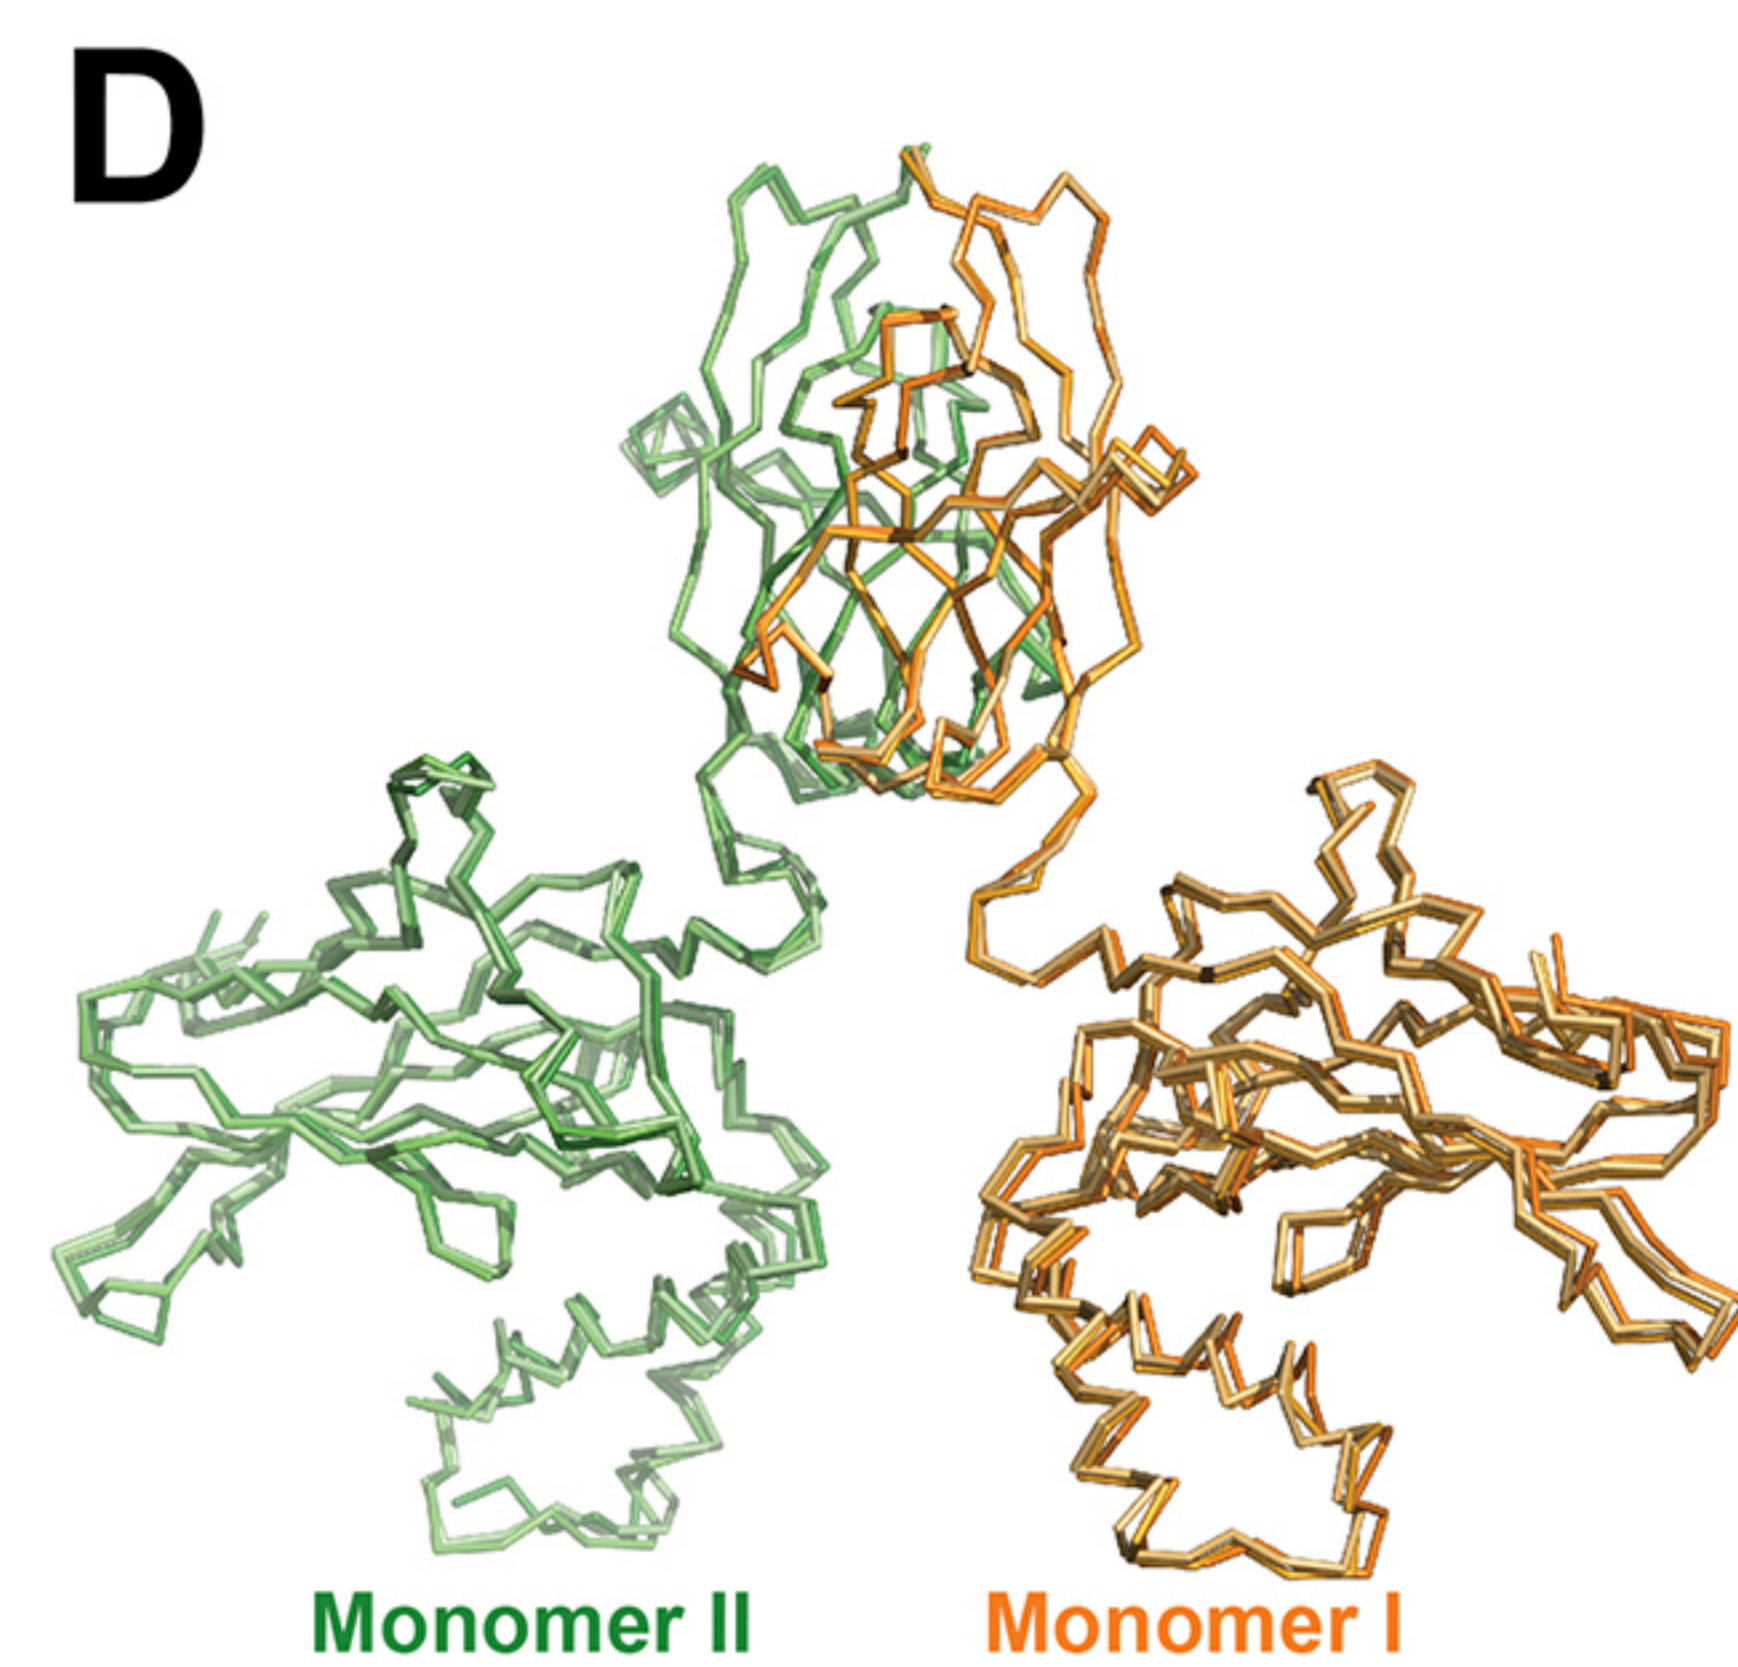**E**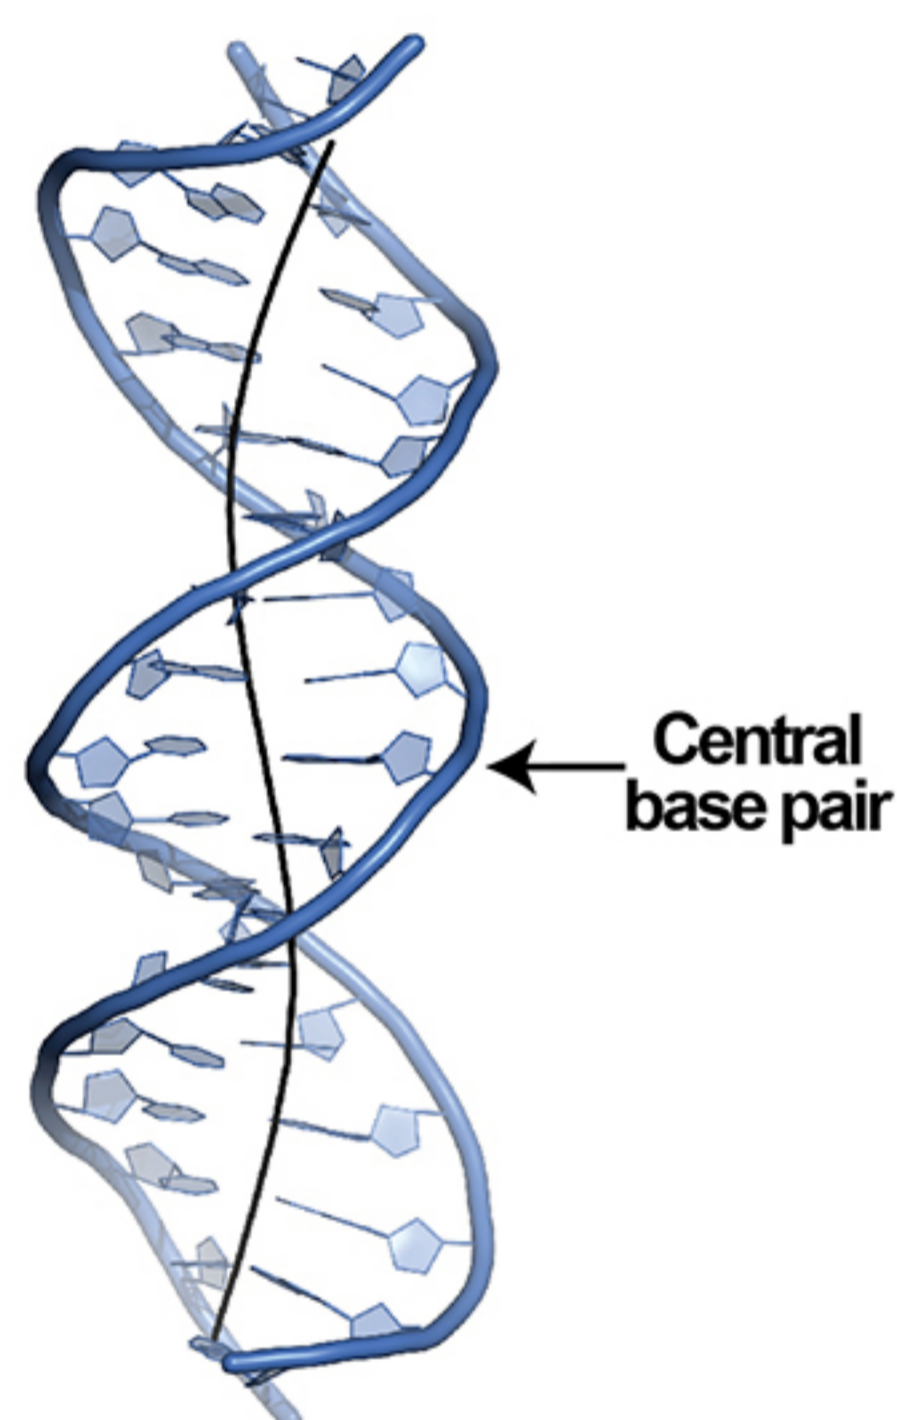**F**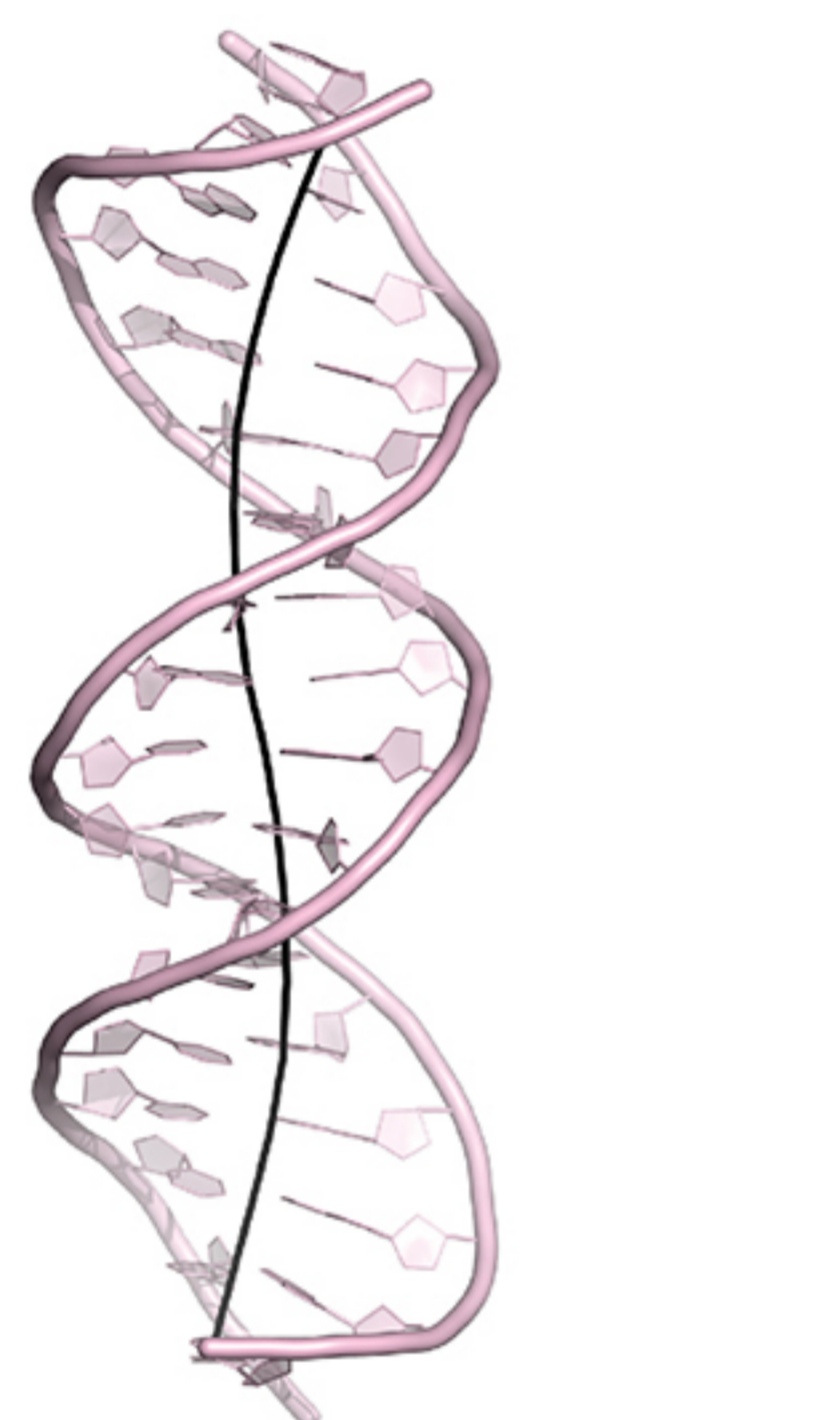**G**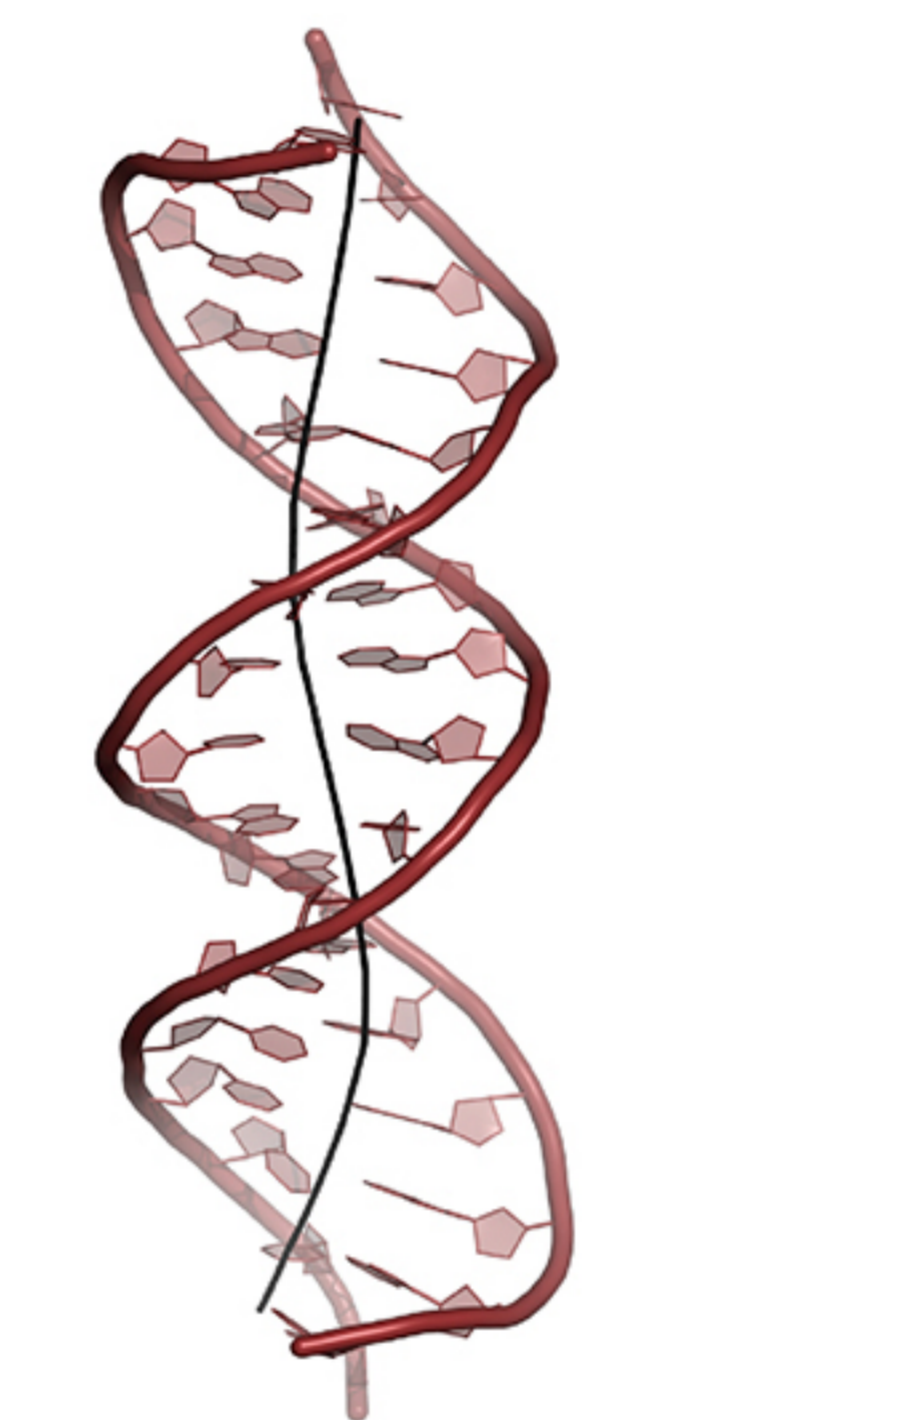**H**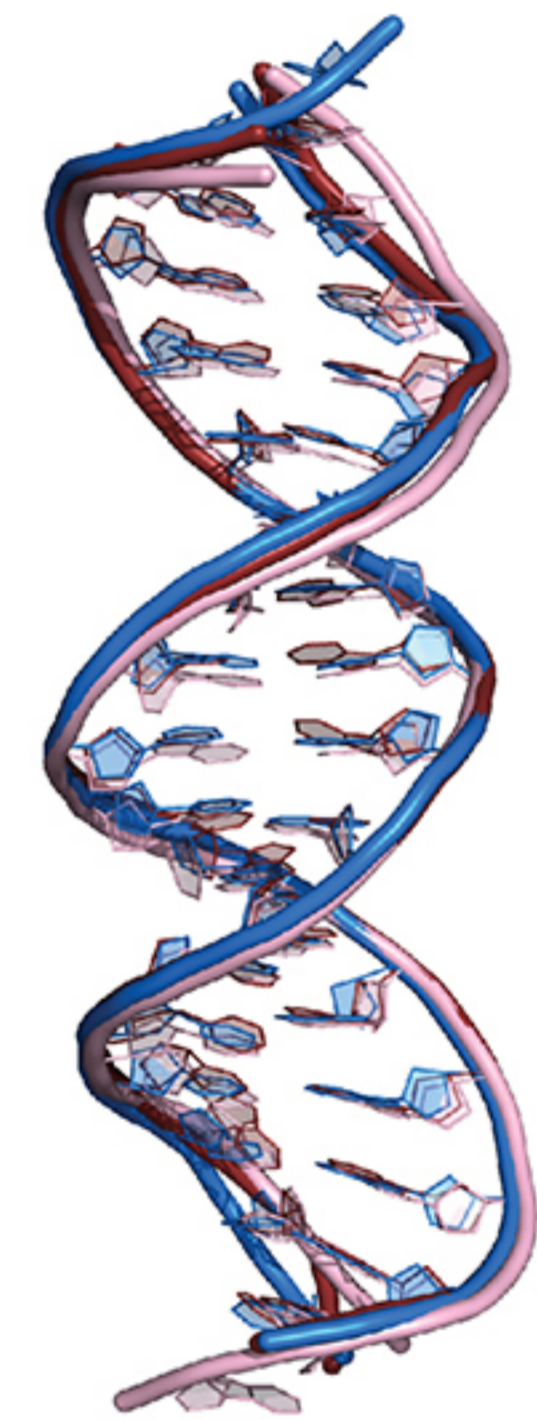

5' -GAAGGGGGT**G**ACCCCTTG-3'  
3' -CTTCCCCCA**C**TGGGGAAC-5'

5' -GAAGGGGGT**A**ACCCCTTG-3'  
3' -CTTCCCCCA**T**TGGGGAAC-5'

5' -GAAGGGGG**A**GTCCCCTTG-3'  
3' -CTTCCCC**C**TAGGGAAC-5'

|            | Psel (natural G/C-centric) κB DNA (this study) |                    | Psel (-1/+1 swap) κB DNA (this study) |                    | Psel (mutant A/T-centric) κB DNA (this study) |                    | MHC κB DNA         |                    | κB-33              |                    | κB-55              |                    | Ideal B-DNA        |     |   |     |     |     |
|------------|------------------------------------------------|--------------------|---------------------------------------|--------------------|-----------------------------------------------|--------------------|--------------------|--------------------|--------------------|--------------------|--------------------|--------------------|--------------------|-----|---|-----|-----|-----|
|            | Protein                                        | p52(1 - 398)       | p52(1 - 398)                          | p52(1 - 398)       | p52(1 - 327)                                  | p52(35 - 329)      | free               | RelA:RelA bound    | free               | p52:RelB bound     |                    |                    |                    |     |   |     |     |     |
| DNA length | 18 bp                                          |                    | 18 bp                                 |                    | 18 bp                                         |                    | 13 bp              |                    | 13 bp              |                    |                    |                    |                    |     |   |     |     |     |
| Positions  | Minor groove width                             | Major groove depth | Minor groove width                    | Major groove depth | Minor groove width                            | Major groove depth | Minor groove width | Major groove depth | Minor groove width | Major groove depth | Minor groove width | Major groove depth | Minor groove width |     |   |     |     |     |
|            | A                                              |                    |                                       | A                  |                                               | A                  |                    |                    |                    | C                  |                    |                    |                    |     |   |     |     |     |
| G          | 6.7                                            | /                  | G                                     | 7.5                | G                                             | 7.9                | /                  |                    | T                  | 7.1                | 6.6                |                    |                    |     |   |     |     |     |
| -5         | 6.8                                            | /                  | G                                     | 7.4                | G                                             | 7.4                | /                  |                    | G                  | 6.7                | 6.0                |                    |                    |     |   |     |     |     |
| G          | 6.4                                            | /                  | G                                     | 6.8                | G                                             | 6.6                | /                  |                    | G                  | 6.5                | 5.6                |                    |                    |     |   |     |     |     |
| -4         | 6.0                                            | /                  | G                                     | 6.1                | G                                             | 6.1                | /                  |                    | G                  | 5.5                | 5.3                |                    |                    |     |   |     |     |     |
| G          | 5.9                                            | /                  | G                                     | 5.6                | G                                             | 5.9                | /                  |                    | G                  | 6.3                | 5.2                | G                  |                    |     |   |     |     |     |
| 5.7        | /                                              | G                  | 5.9                                   | /                  | G                                             | 5.6                | /                  | 7.3                |                    | 6.4                | 4.1                | G                  |                    |     |   |     |     |     |
| -3         | 5.8                                            | /                  | G                                     | 6.3                | G                                             | 5.8                | /                  | G                  | 7.4                |                    | A                  | 6.0                | 3.1                | G   |   |     |     |     |
| G          | 5.8                                            | /                  | G                                     | 6.0                | G                                             | 5.5                | /                  |                    | G                  | 4.6                | 2.8                |                    |                    | 5.9 |   |     |     |     |
| -2         | 5.9                                            | 4.9                | G                                     | 5.5                | 4.7                                           | G                  | 5.3                | 4.7                | G                  | 4.1                | 3.7                | A                  | 3.4                | 3.2 | G | 7.8 | 5.9 |     |
| 5.9        | 5.3                                            | G                  | 5.6                                   | 5.4                | G                                             | 5.5                | 5.4                | 3.3                | 5.1                | 3.2                | 4.9                | A                  | 3.4                | 3.3 |   | 5.9 | 5.9 |     |
| -1         | 6.5                                            | 5.7                | A                                     | 6.3                | 6.2                                           | T                  | 6.3                | 6.1                | T                  | 3.1                | 5.3                | A                  | 3.7                | 3.6 | A | 4.4 | 3.2 | 5.9 |
| 7.7        | 6.7                                            | G                  | 7.5                                   | 6.8                | A                                             | 7.4                | 6.8                | 3.6                | 5.0                | 3.6                | 5.7                | A                  | 3.7                | 4.1 | A | 3.9 | 3.7 | 5.9 |
| 0          | 8.2                                            | 7.0                | G                                     | 8.1                | 6.8                                           | A                  | 8.0                | 7.1                | A                  | 4.0                | 4.4                | T                  | 4.0                | 5.5 | A | 4.2 | 4.2 | 5.9 |
| 7.3        | 6.9                                            | G                  | 7.3                                   | 6.4                | A                                             | 7.1                | 6.7                | 3.5                | 4.9                | 3.8                | 5.9                | T                  | 3.7                | 4.2 | A | 4.1 | 3.9 | 5.9 |
| +1         | 5.9                                            | 5.9                | T                                     | 6.0                | 5.9                                           | A                  | 5.7                | 6.0                | A                  | 3.0                | 5.3                | T                  | 3.4                | 3.1 | T | 4.2 | 3.6 | 5.9 |
| 5.2        | 4.9                                            | C                  | 5.3                                   | 5.2                | A                                             | 4.7                | 5.1                | 3.3                | 5.3                | 3.3                | 5.0                | T                  | 4.6                | 3.6 | T | 3.9 | 3.4 | 5.9 |
| +2         | 5.0                                            | 5.1                | C                                     | 5.3                | 4.9                                           | C                  | 4.4                | 4.7                | C                  | 4.3                | 4.5                | T                  | 6.0                | 4.5 | T | 4.4 |     | 5.9 |
| 5.0        | /                                              | C                  | 5.9                                   | /                  | C                                             | 4.8                | /                  | 6.1                | /                  | 3.7                | 3.9                | T                  | 6.4                | 5.5 | T | 5.9 |     | 5.9 |
| +3         | 5.3                                            | /                  | C                                     | 6.4                | /                                             | C                  | 5.4                | /                  | C                  | 7.4                | /                  | C                  | 6.4                | 6.5 | C | 7.8 |     |     |
| 6.2        | /                                              | C                  | 6.2                                   | /                  | C                                             | 5.8                | /                  | 7.3                | /                  | 5.5                | /                  | C                  | 5.5                | 6.6 | C |     |     |     |
| +4         | 7.1                                            | /                  | C                                     | 6.2                | /                                             | C                  | 6.5                | /                  | C                  |                    |                    | C                  | 6.5                | 6.6 | C |     |     |     |
| 7.3        | /                                              | C                  | 6.8                                   | /                  | C                                             | 6.9                | /                  |                    |                    | 6.7                | 6.9                | C                  | 6.7                | 6.9 | C |     |     |     |
| +5         | 7.7                                            | /                  | C                                     | 7.4                | /                                             | C                  | 7.5                | /                  | C                  |                    |                    | A                  | 7.1                | 7.0 | A |     |     |     |
| 8.4        | /                                              | T                  | 8.1                                   | /                  | T                                             | 8.3                | /                  |                    |                    |                    |                    | G                  |                    |     | G |     |     |     |
| 8.8        | /                                              | T                  | 8.3                                   | /                  | T                                             | 8.7                | /                  |                    |                    |                    |                    | C                  |                    |     | C |     |     |     |

**A**

- p52:p52 (1-398)  
bound to PSeI  
(G/C-centric)  
[PDB 7CLI (*this study*)]

- p52:p52 (35-329)  
bound to MHC  
[PDB 1A3Q]

**Monomer II****DD**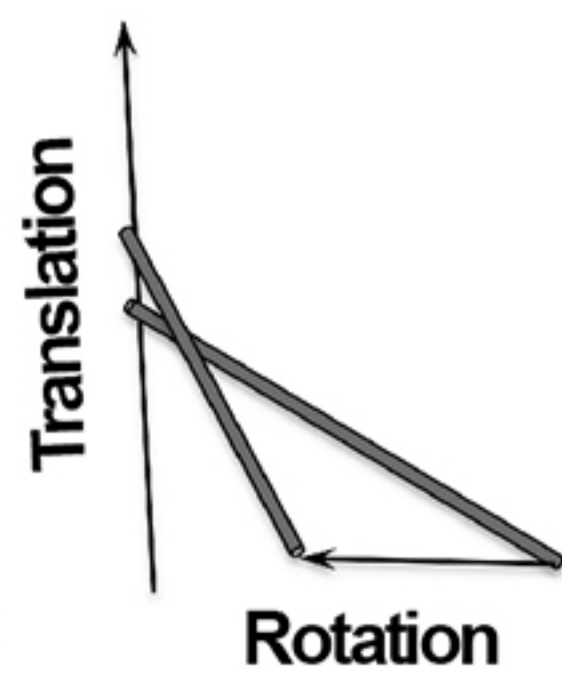**NTD****Monomer I**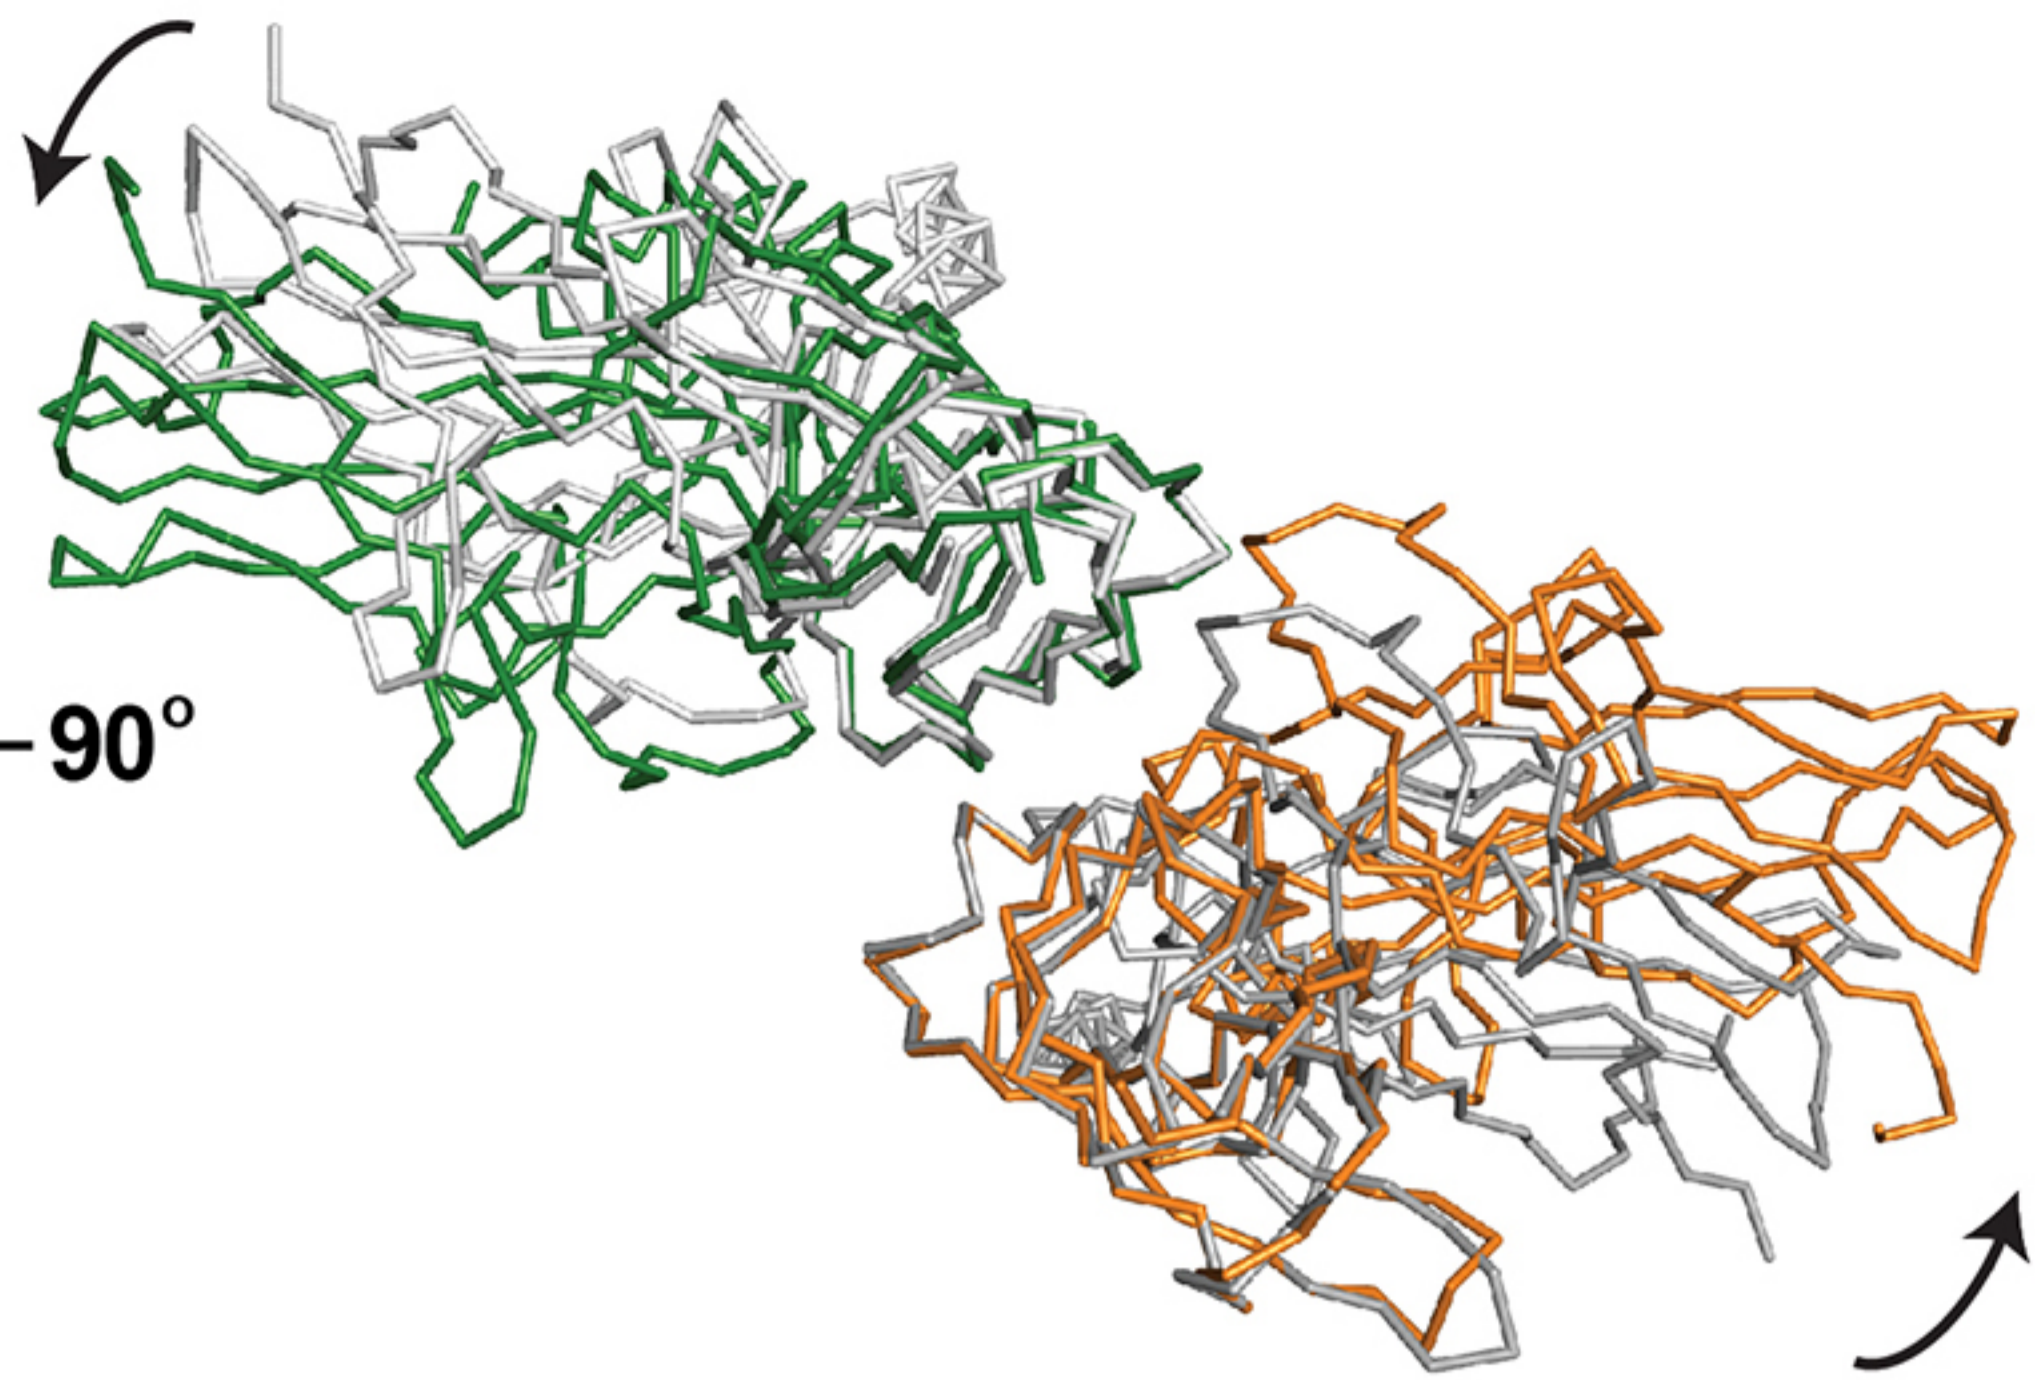**B**

- p52:p52 (1-327)  
bound to PSeI  
(A/T-centric)  
[PDB 7W7L (*this study*)]

- p52:p52 (35-329)  
bound to MHC  
[PDB 1A3Q]

**Monomer II****DD****NTD****Monomer I**

bioRxiv preprint doi: <https://doi.org/10.1101/2022.05.03.490500>; this version posted May 3, 2022. The copyright holder for this preprint (which was not certified by peer review) is the author/funder, who has granted bioRxiv a license to display the preprint in perpetuity. It is made available under aCC-BY 4.0 International license.

**C****DD****NTD****Monomer I****Monomer II****D**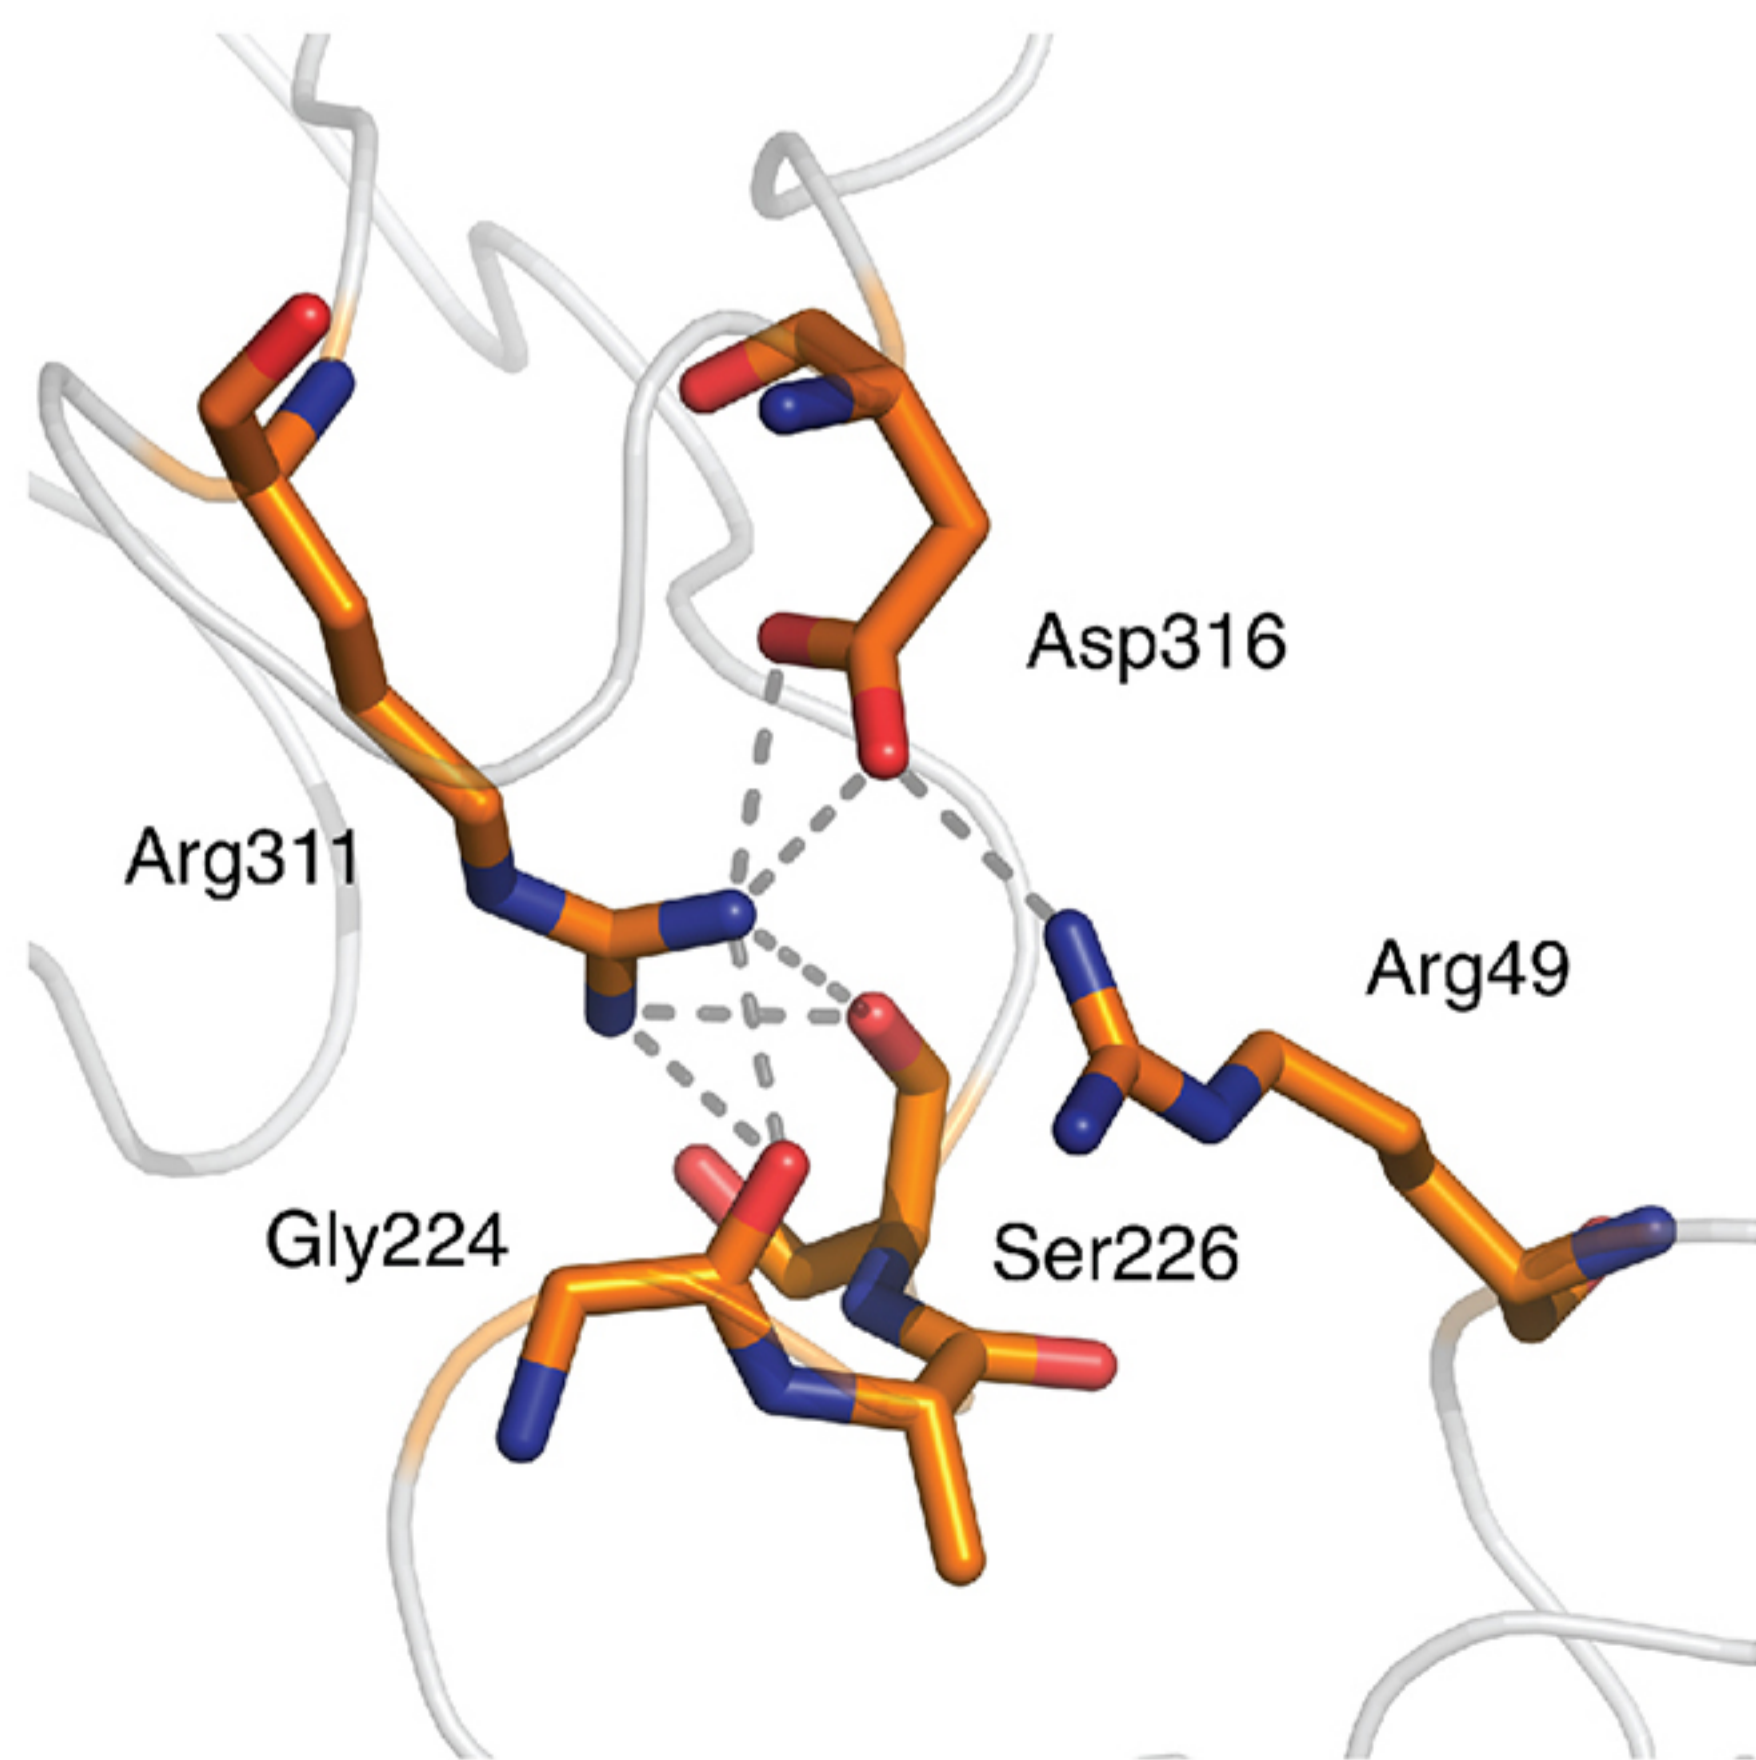**Monomer I**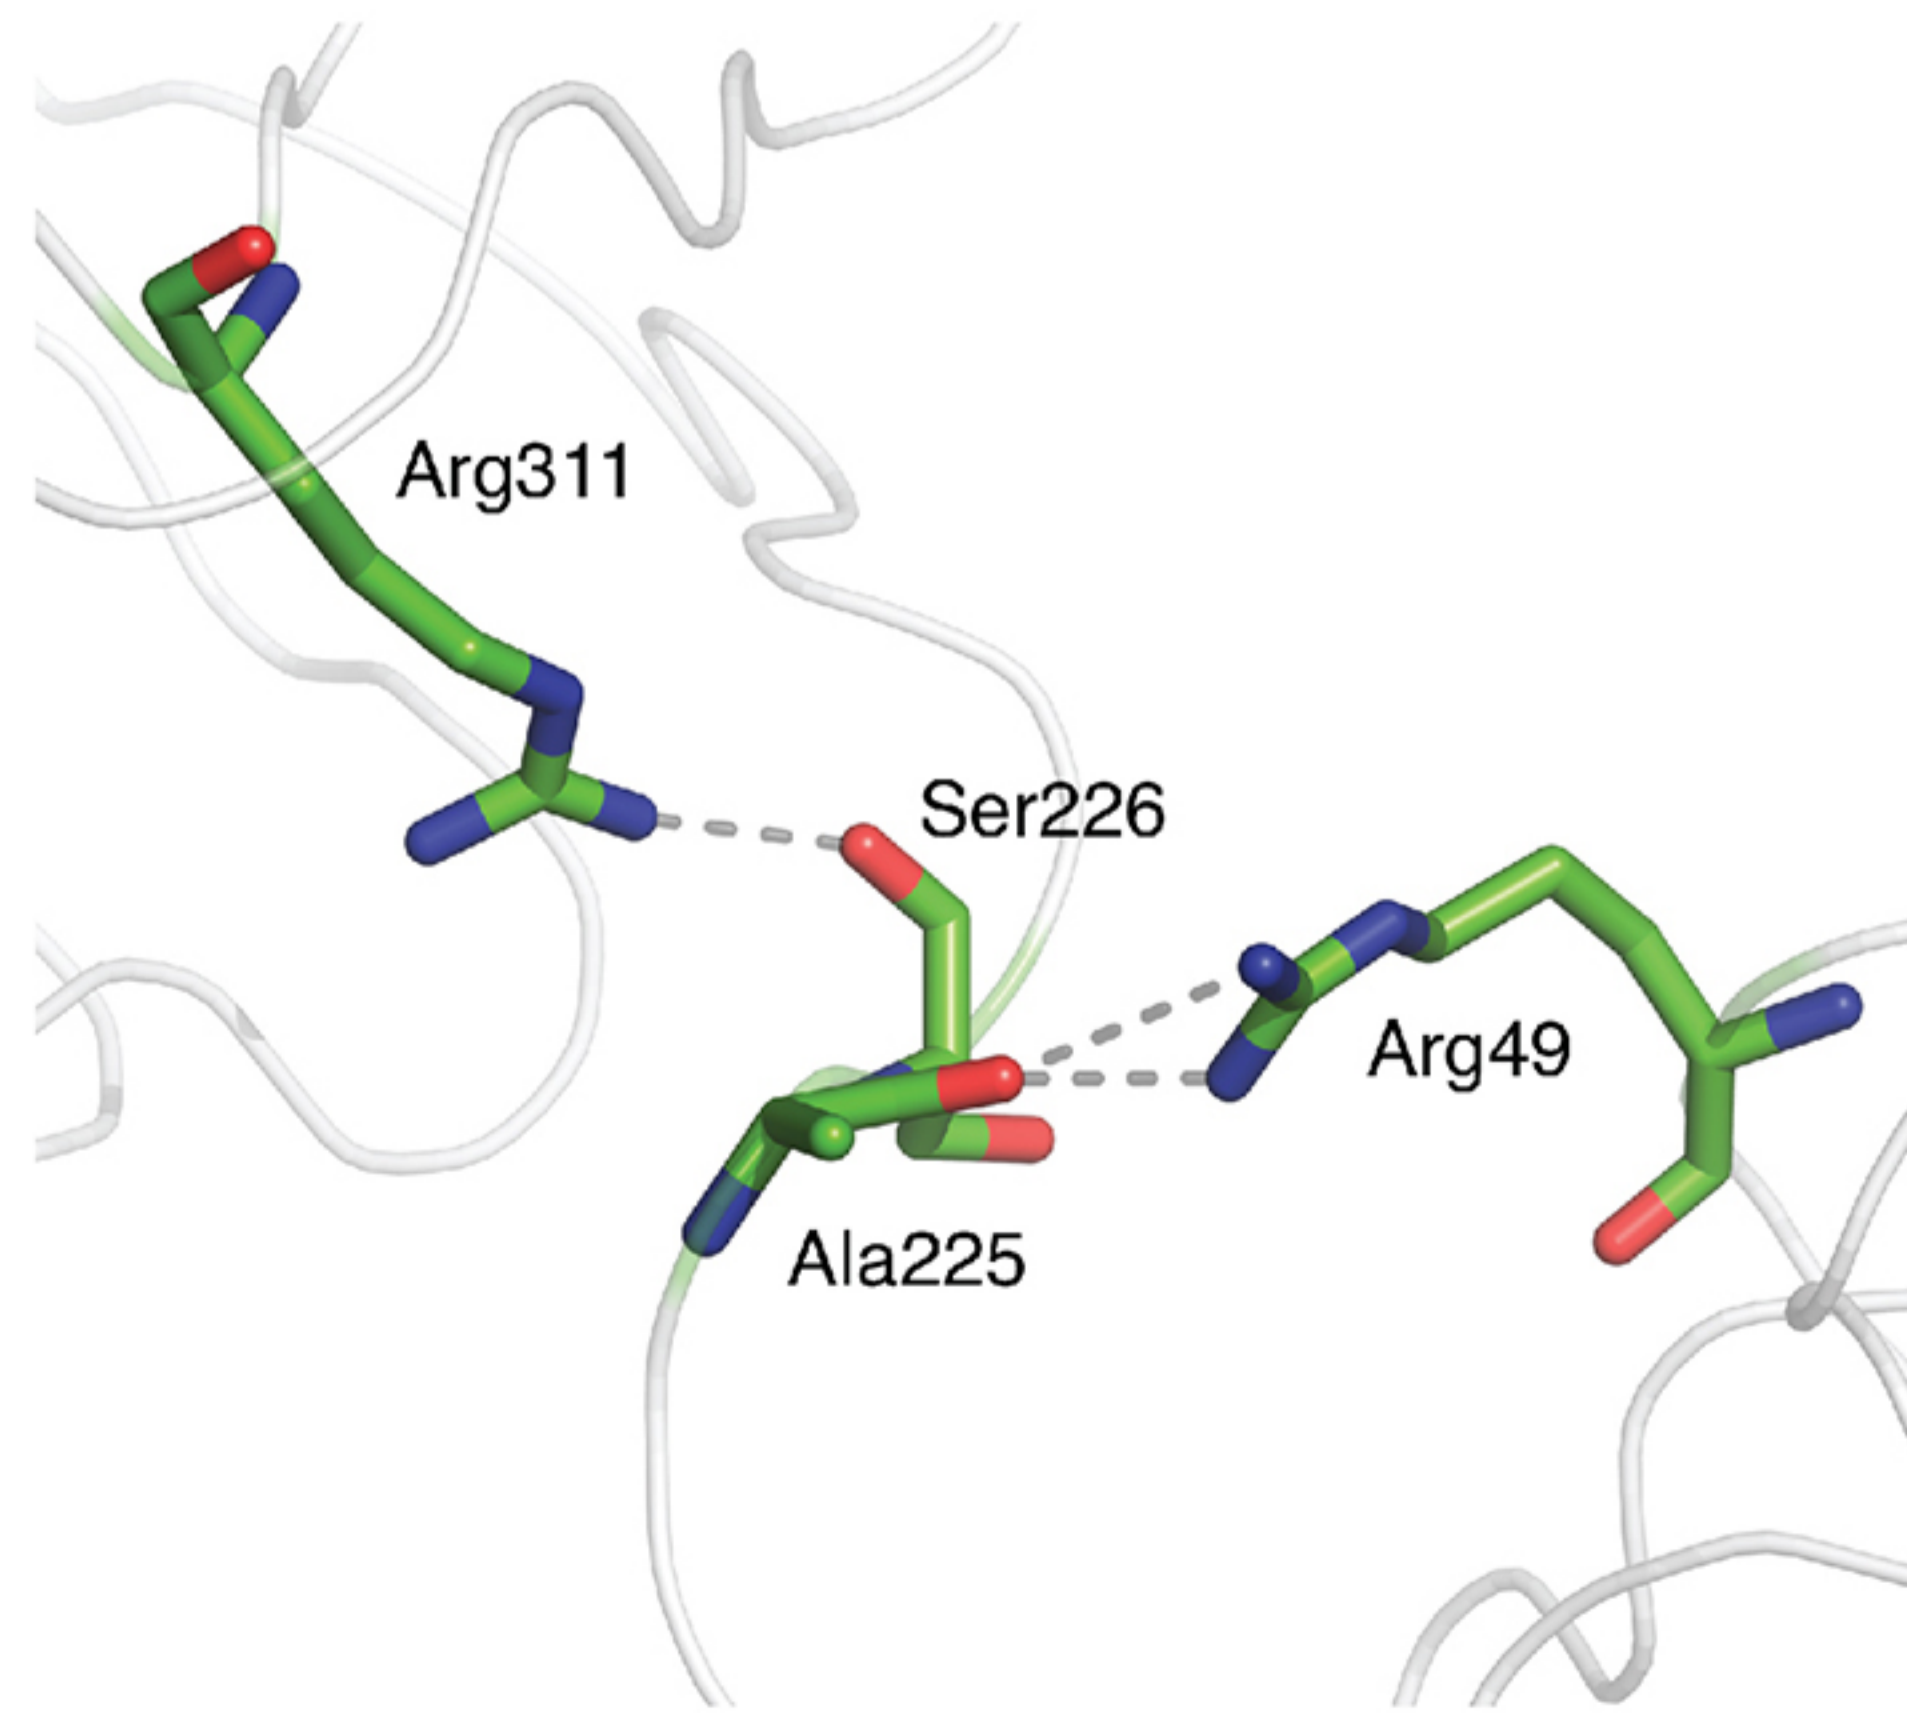**Monomer II**

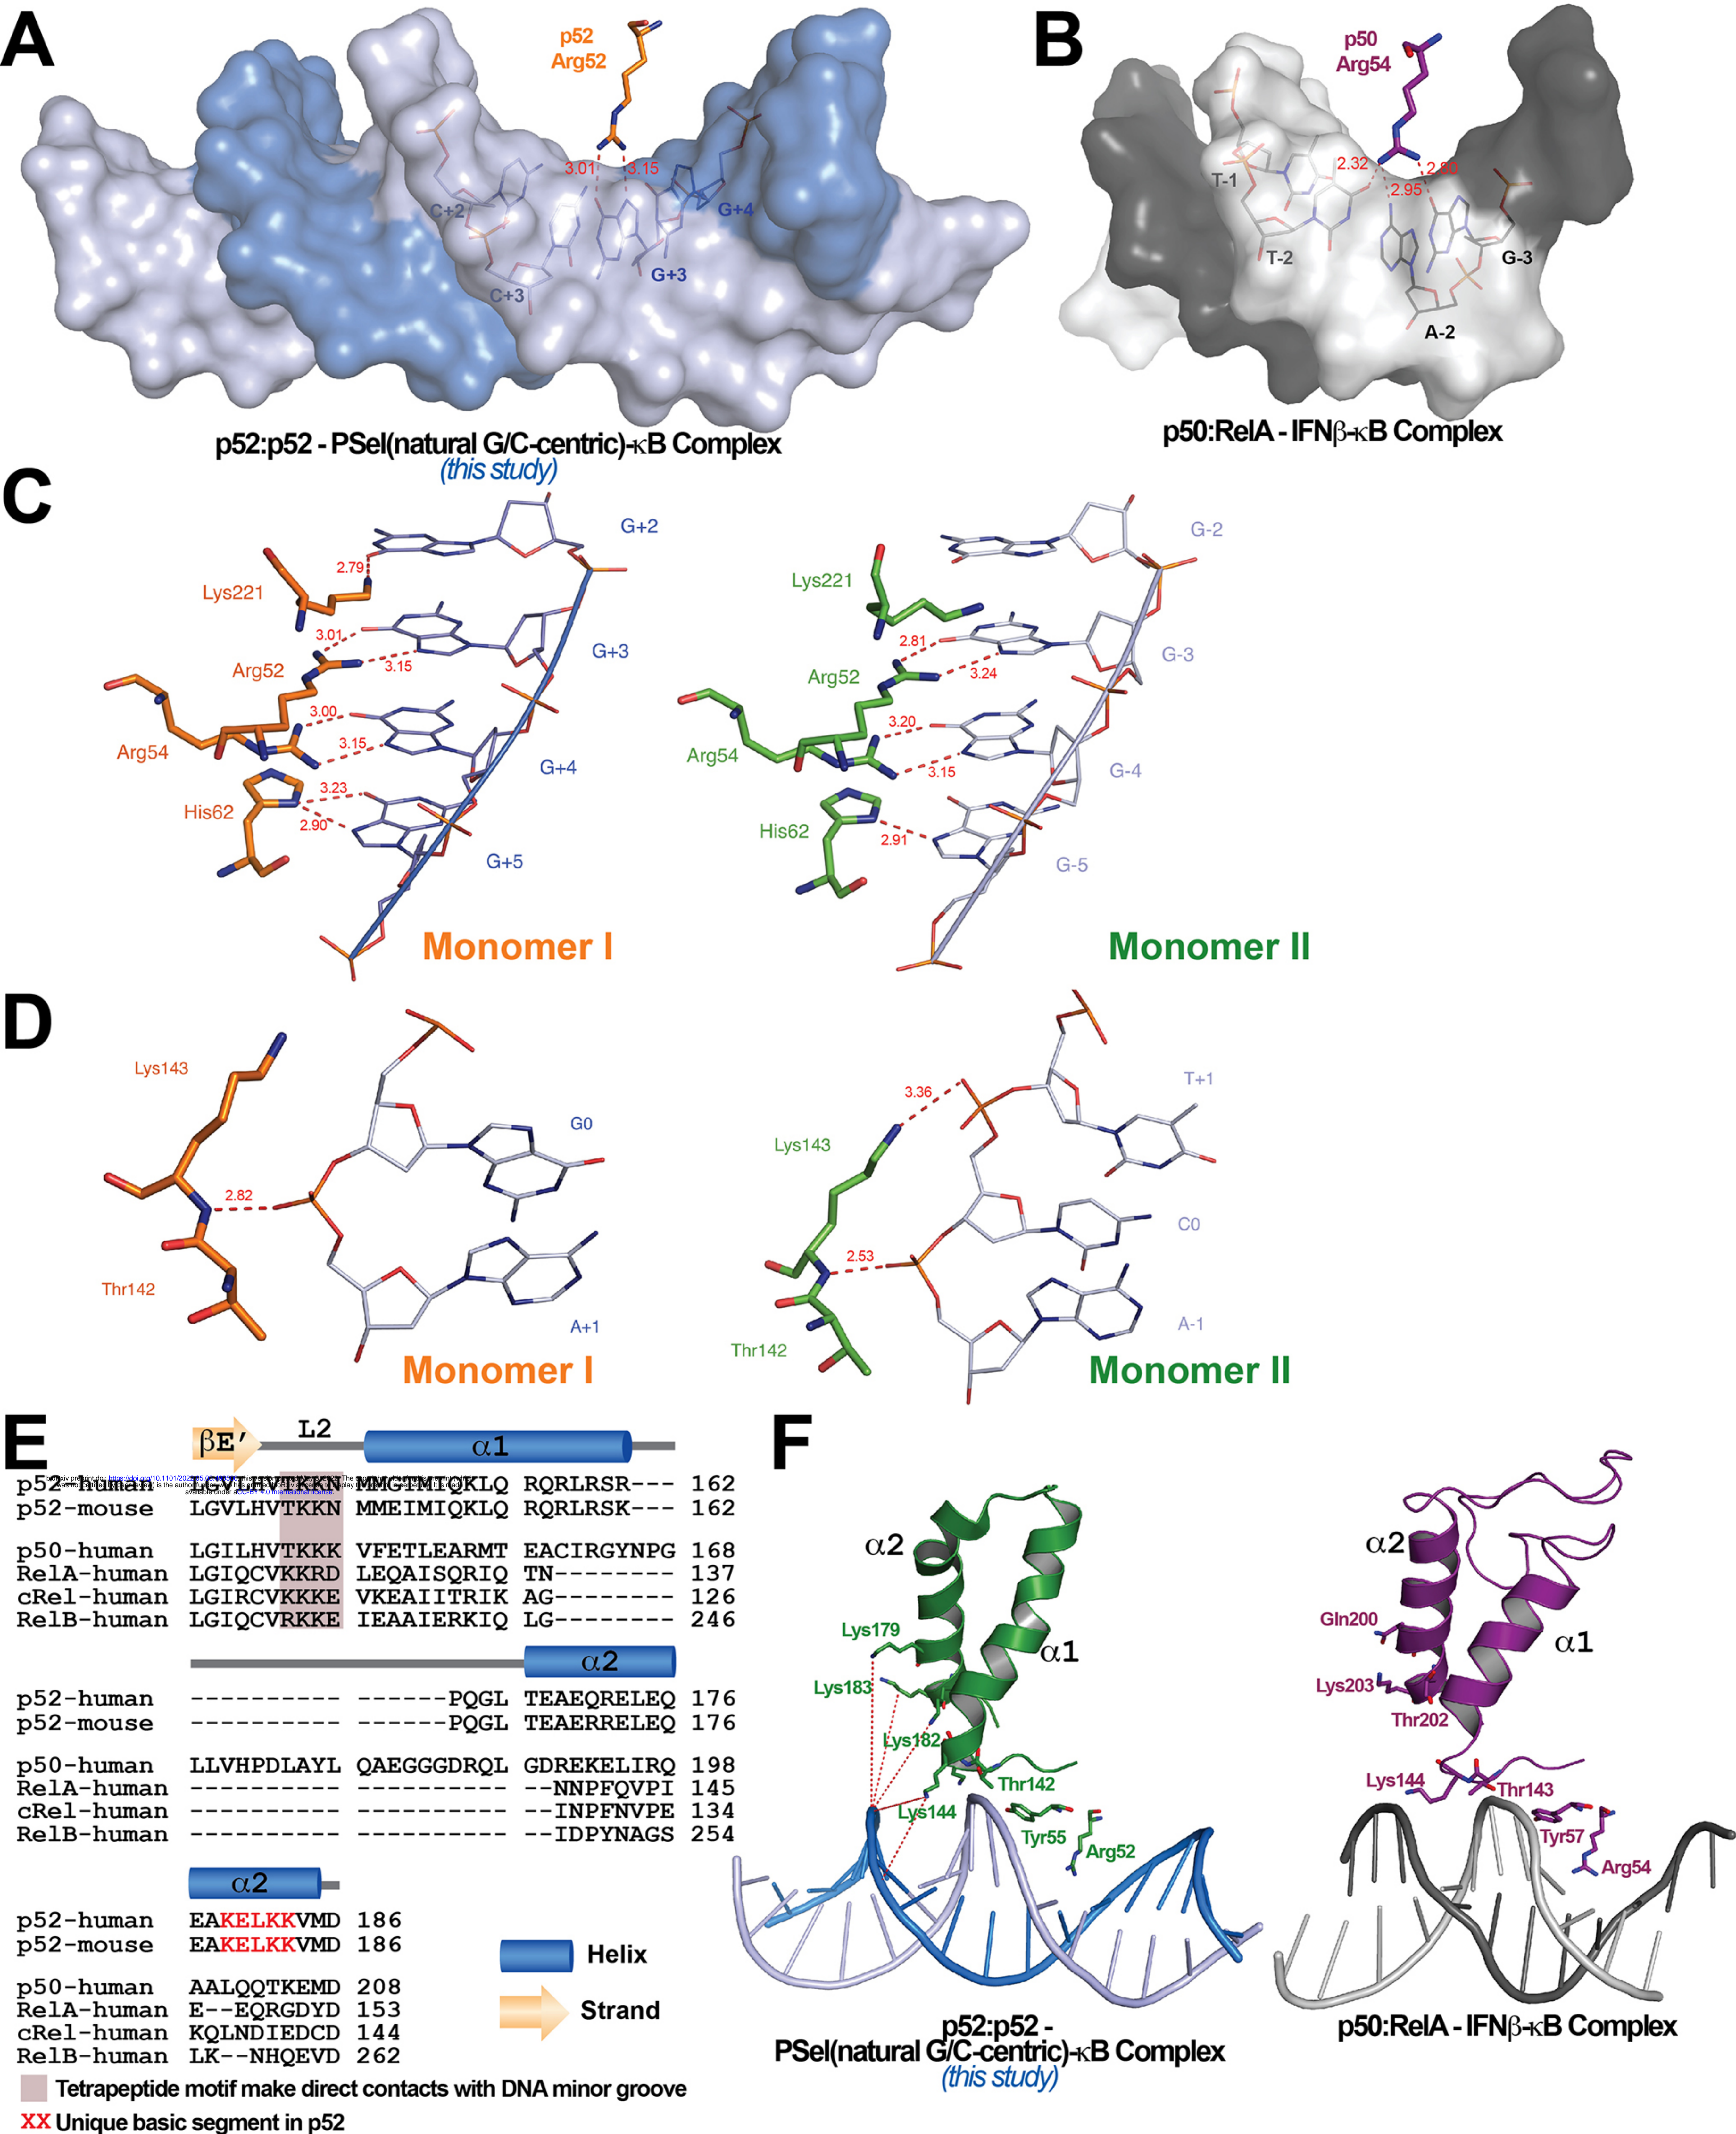

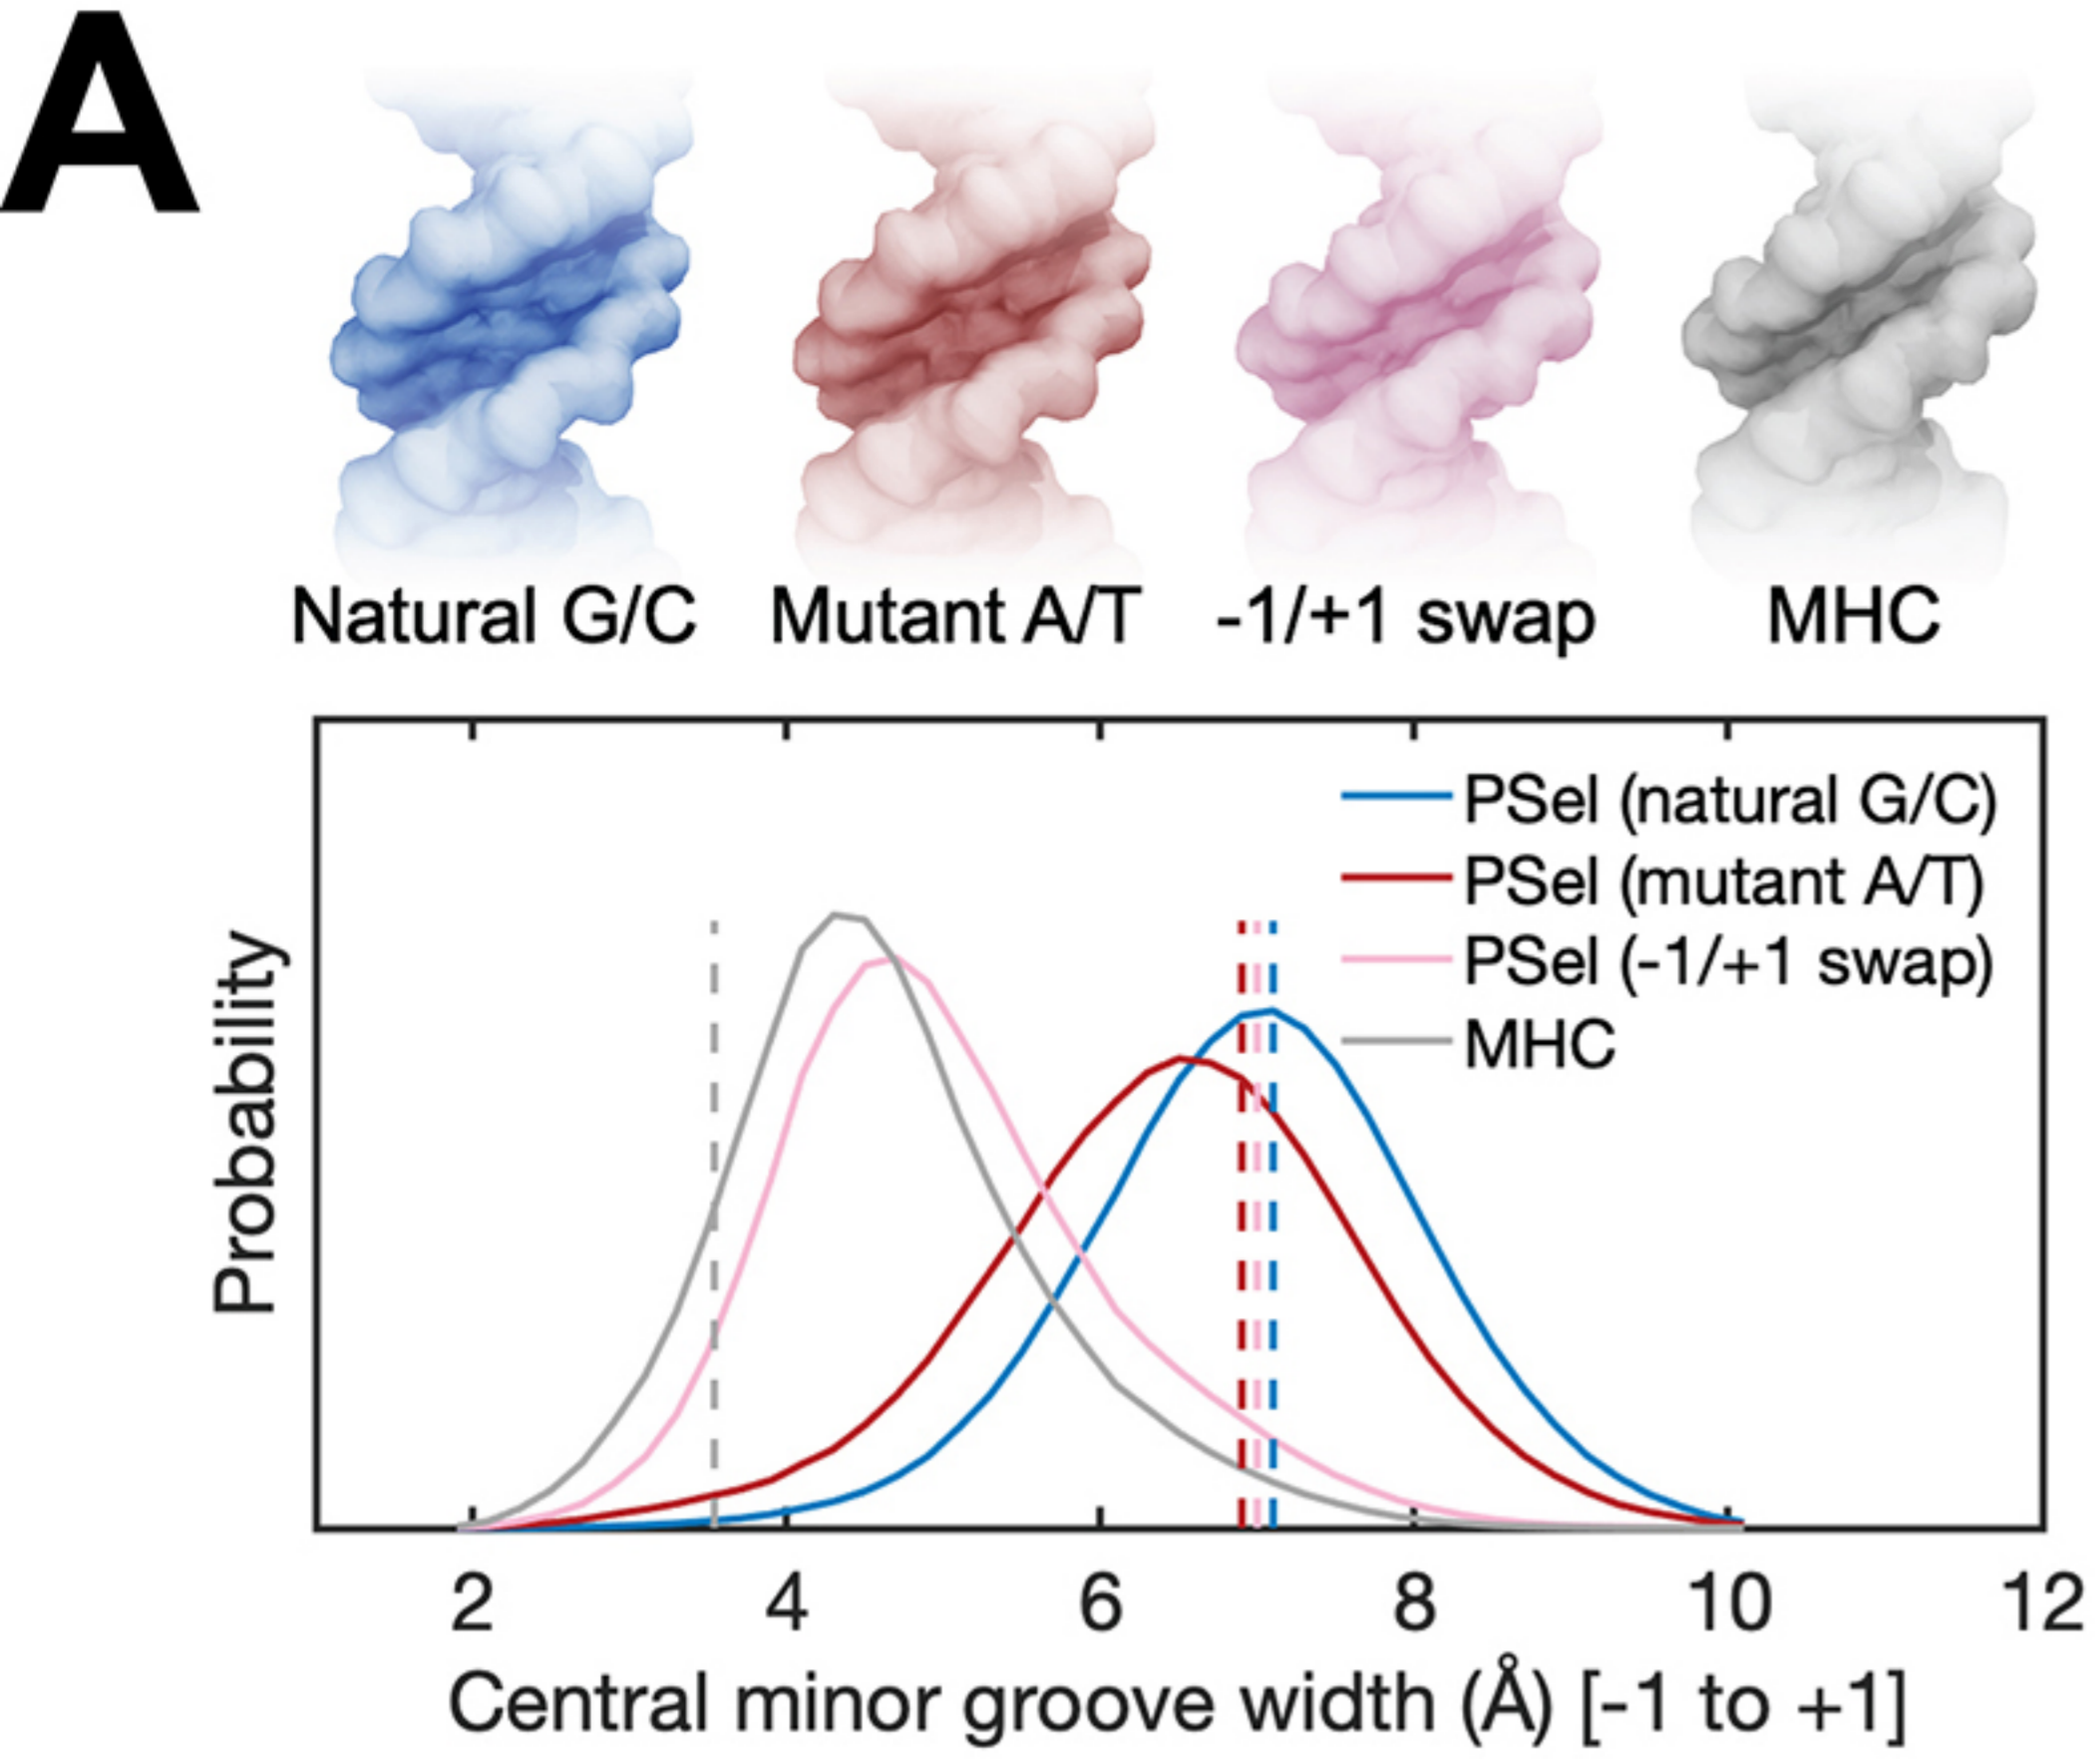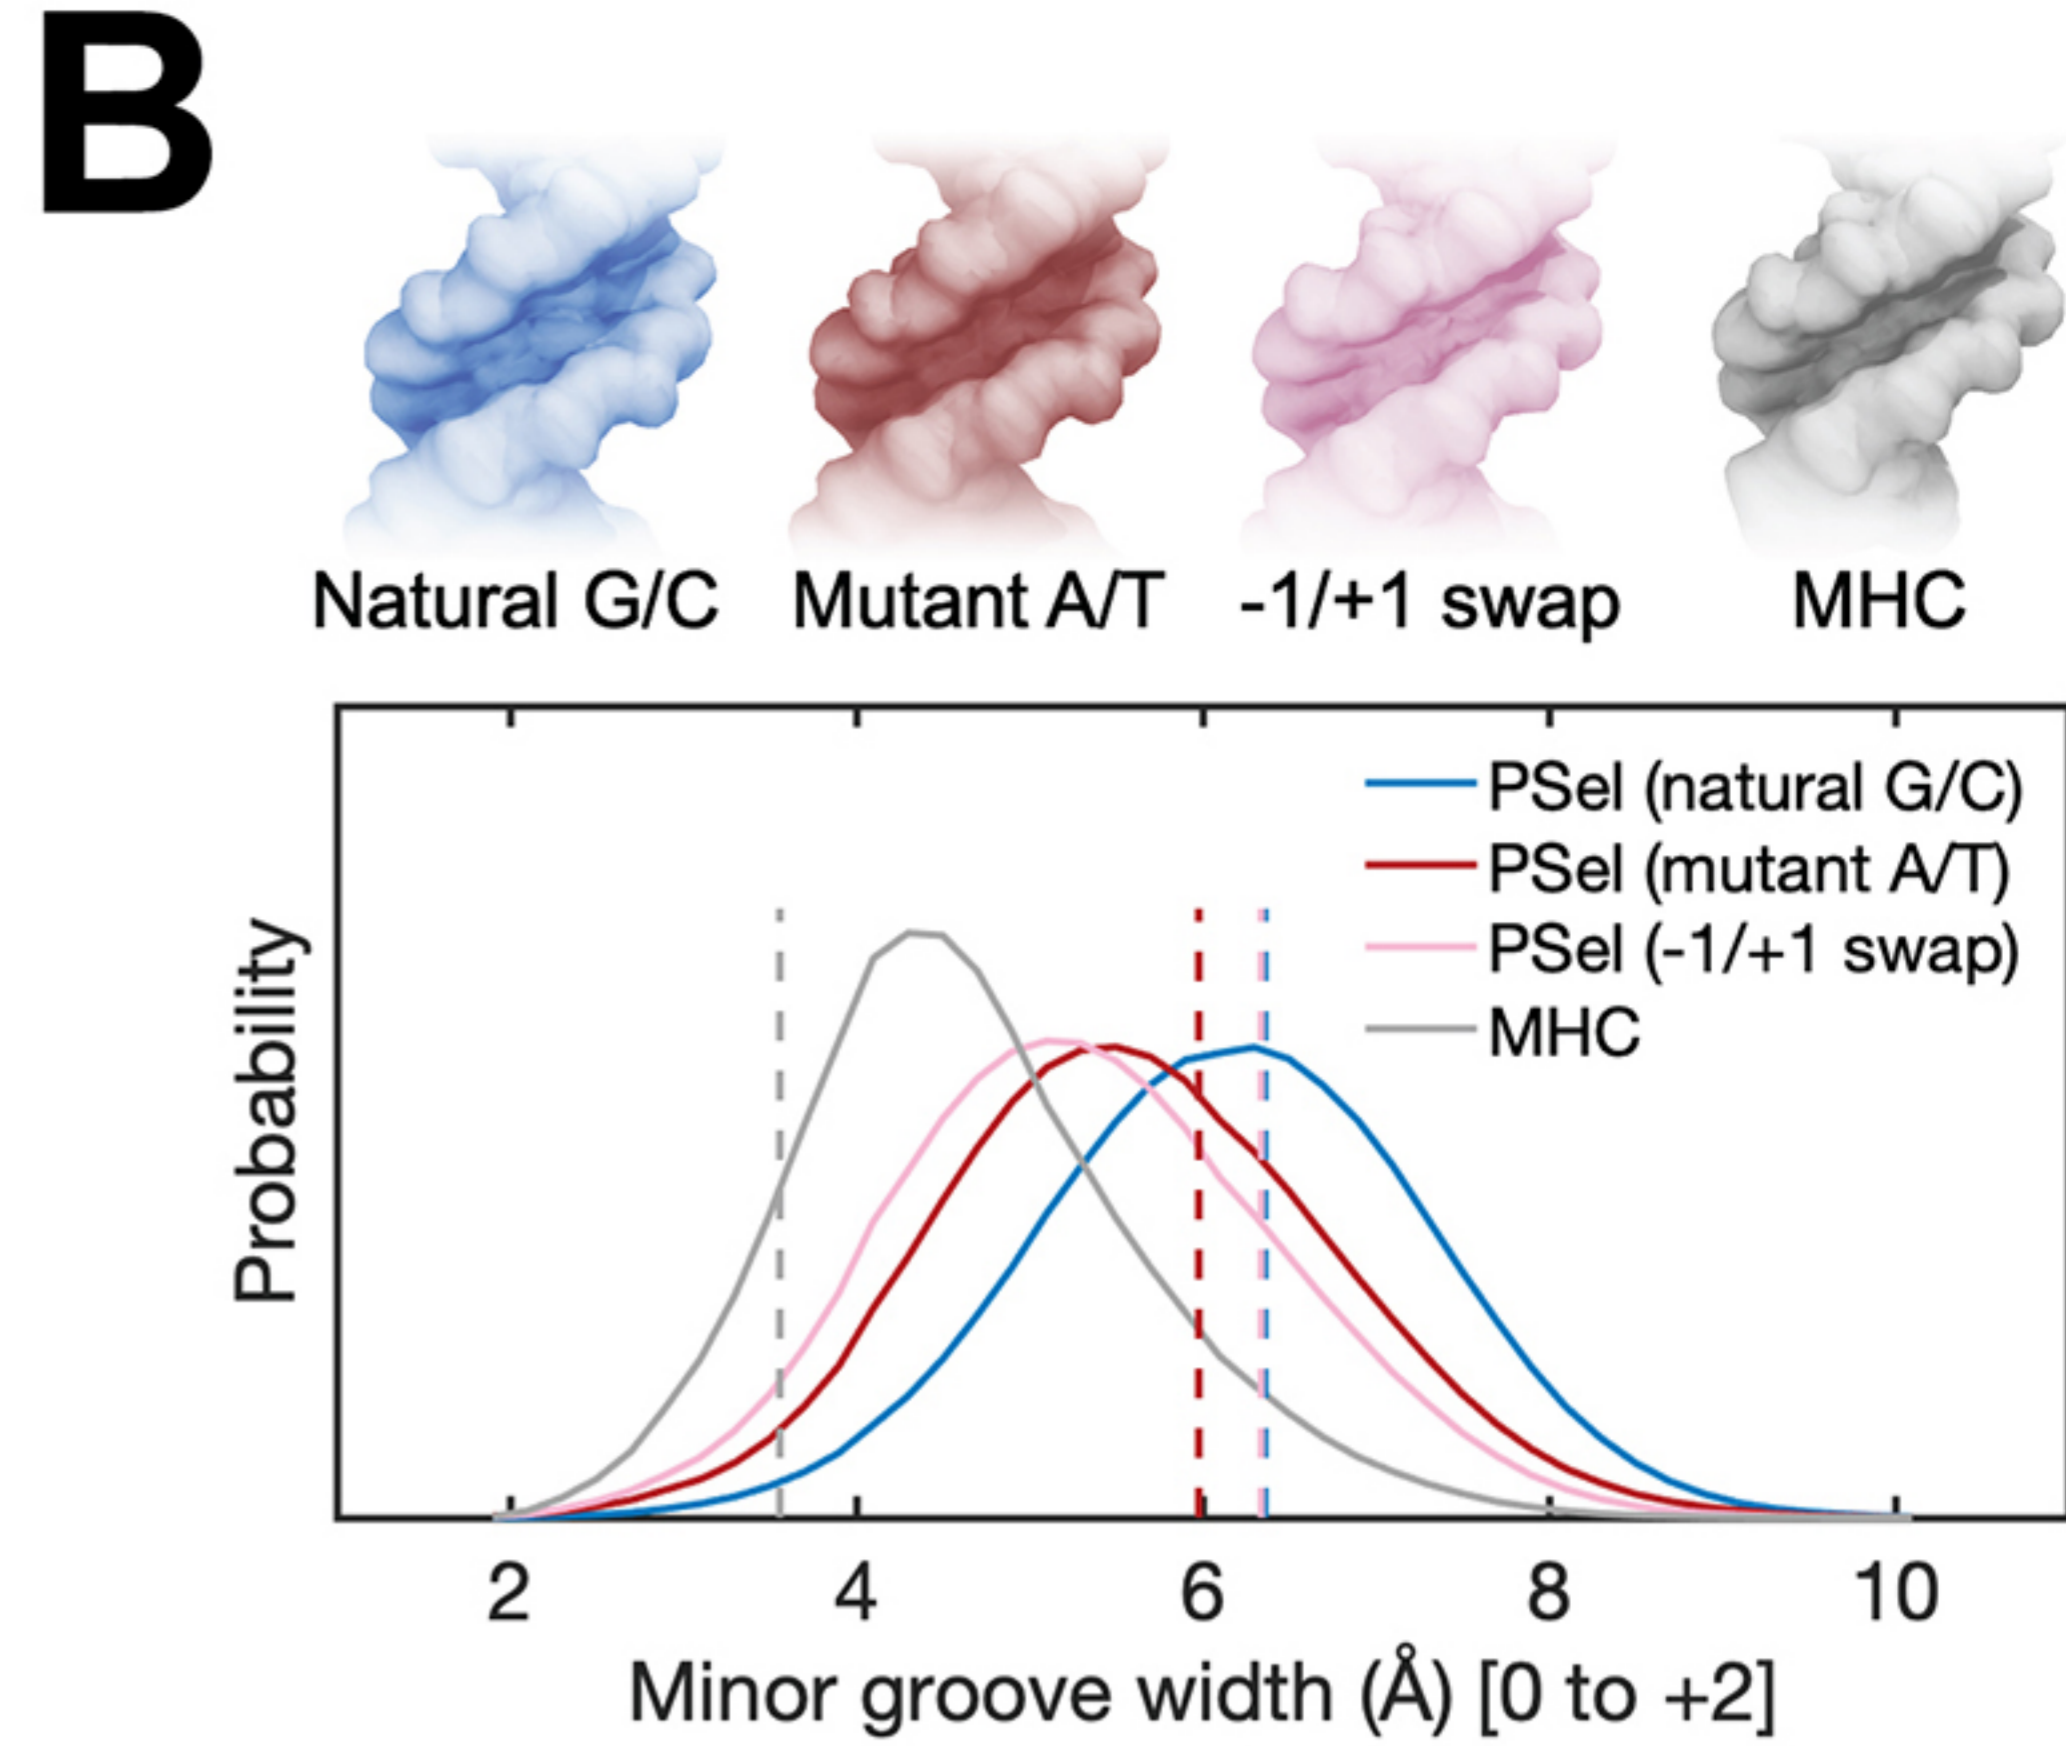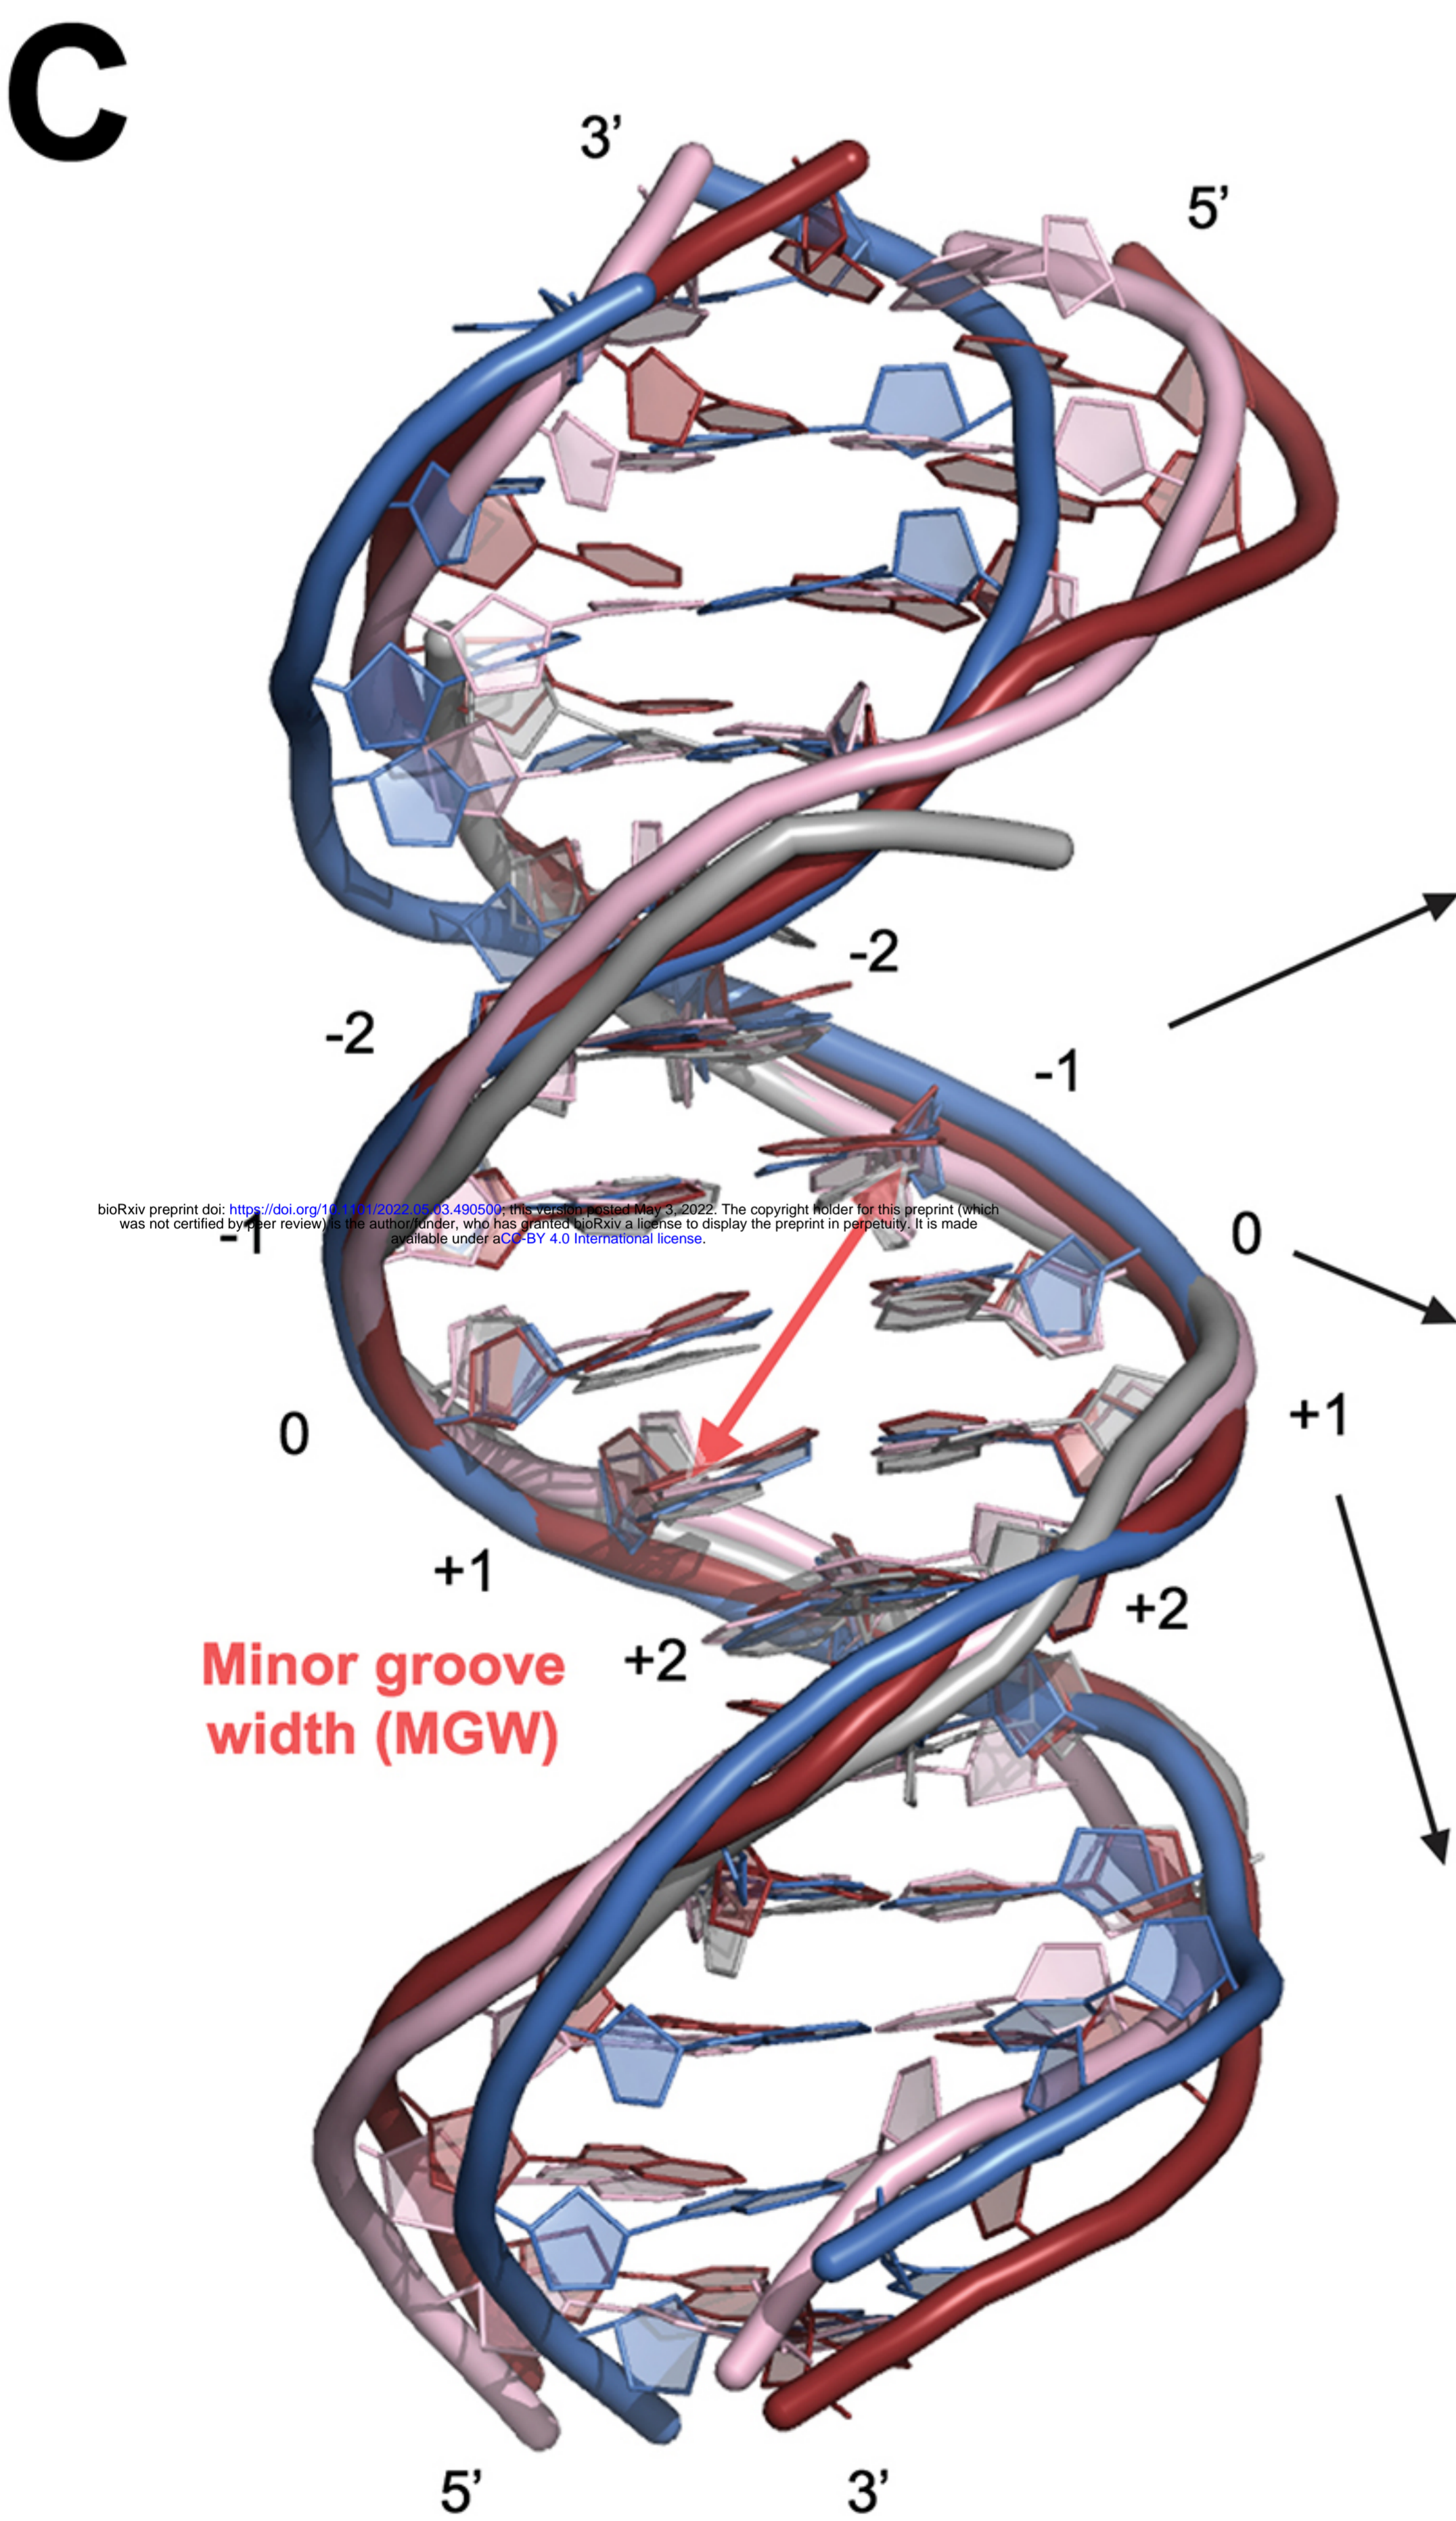

■ PSel(natural G/C) ■ PSel(mutant A/T)  
■ PSel(-1/+1 swap) ■ MHC

Position -1

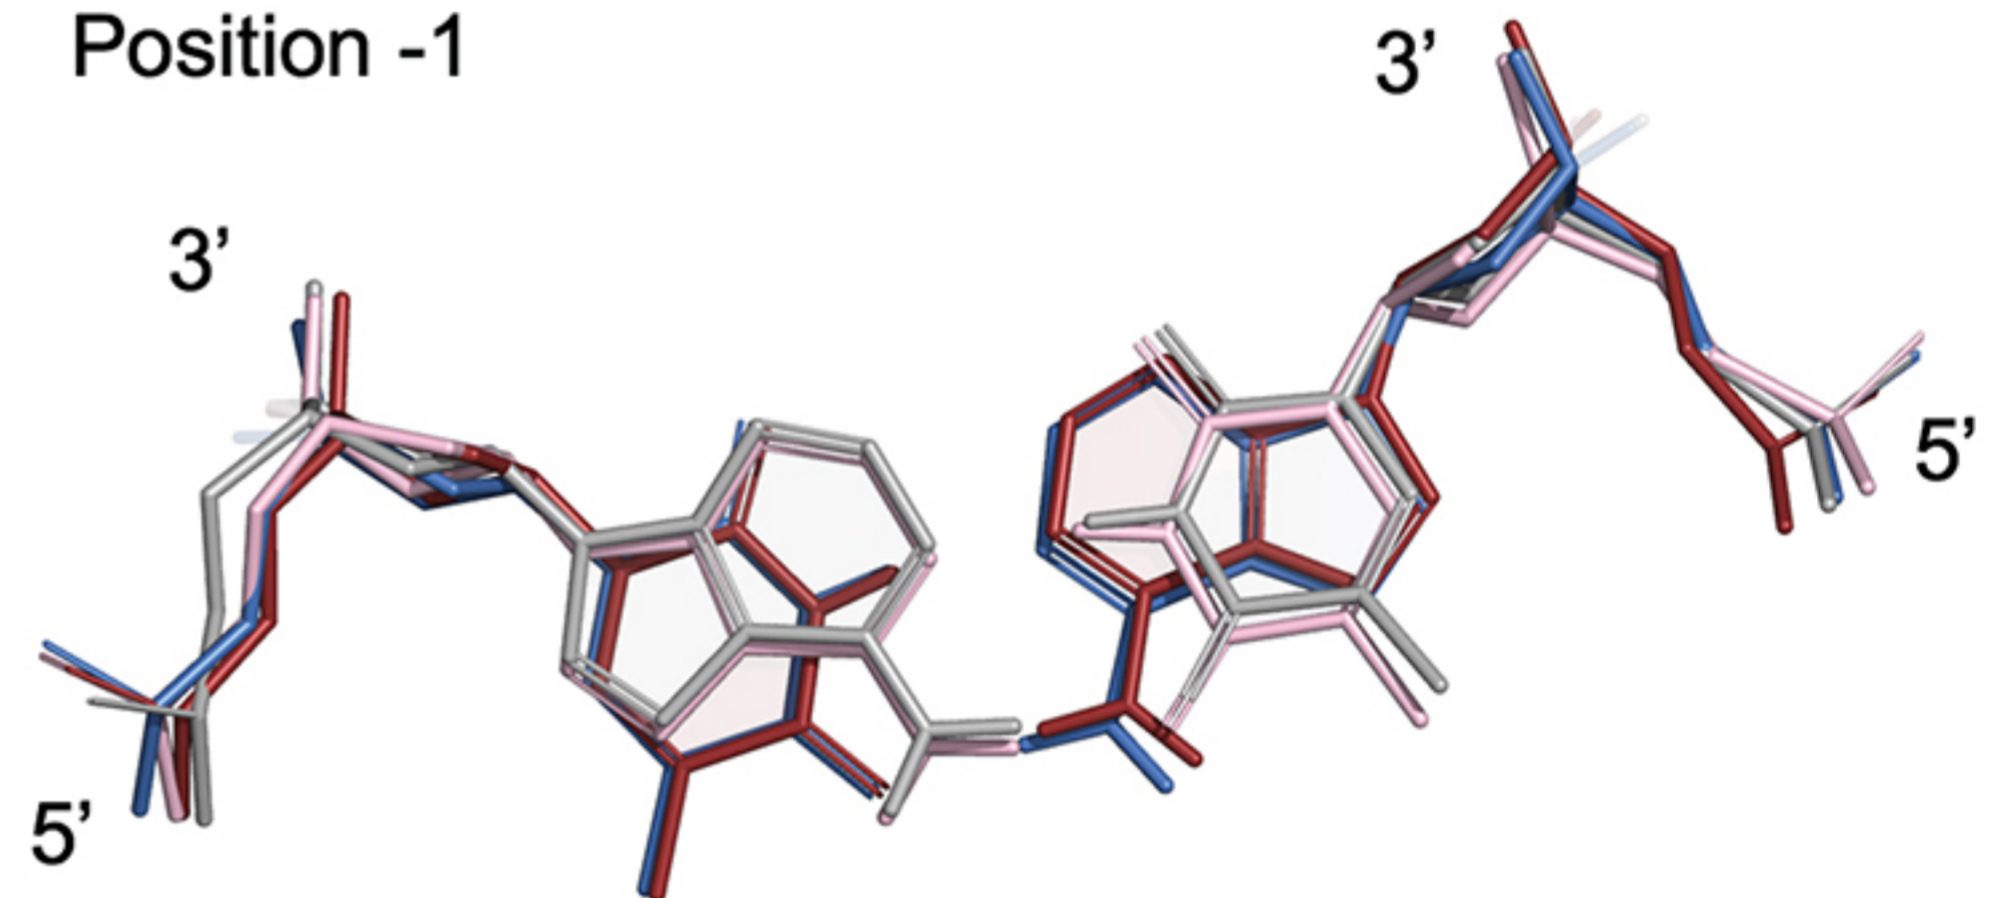

Position 0

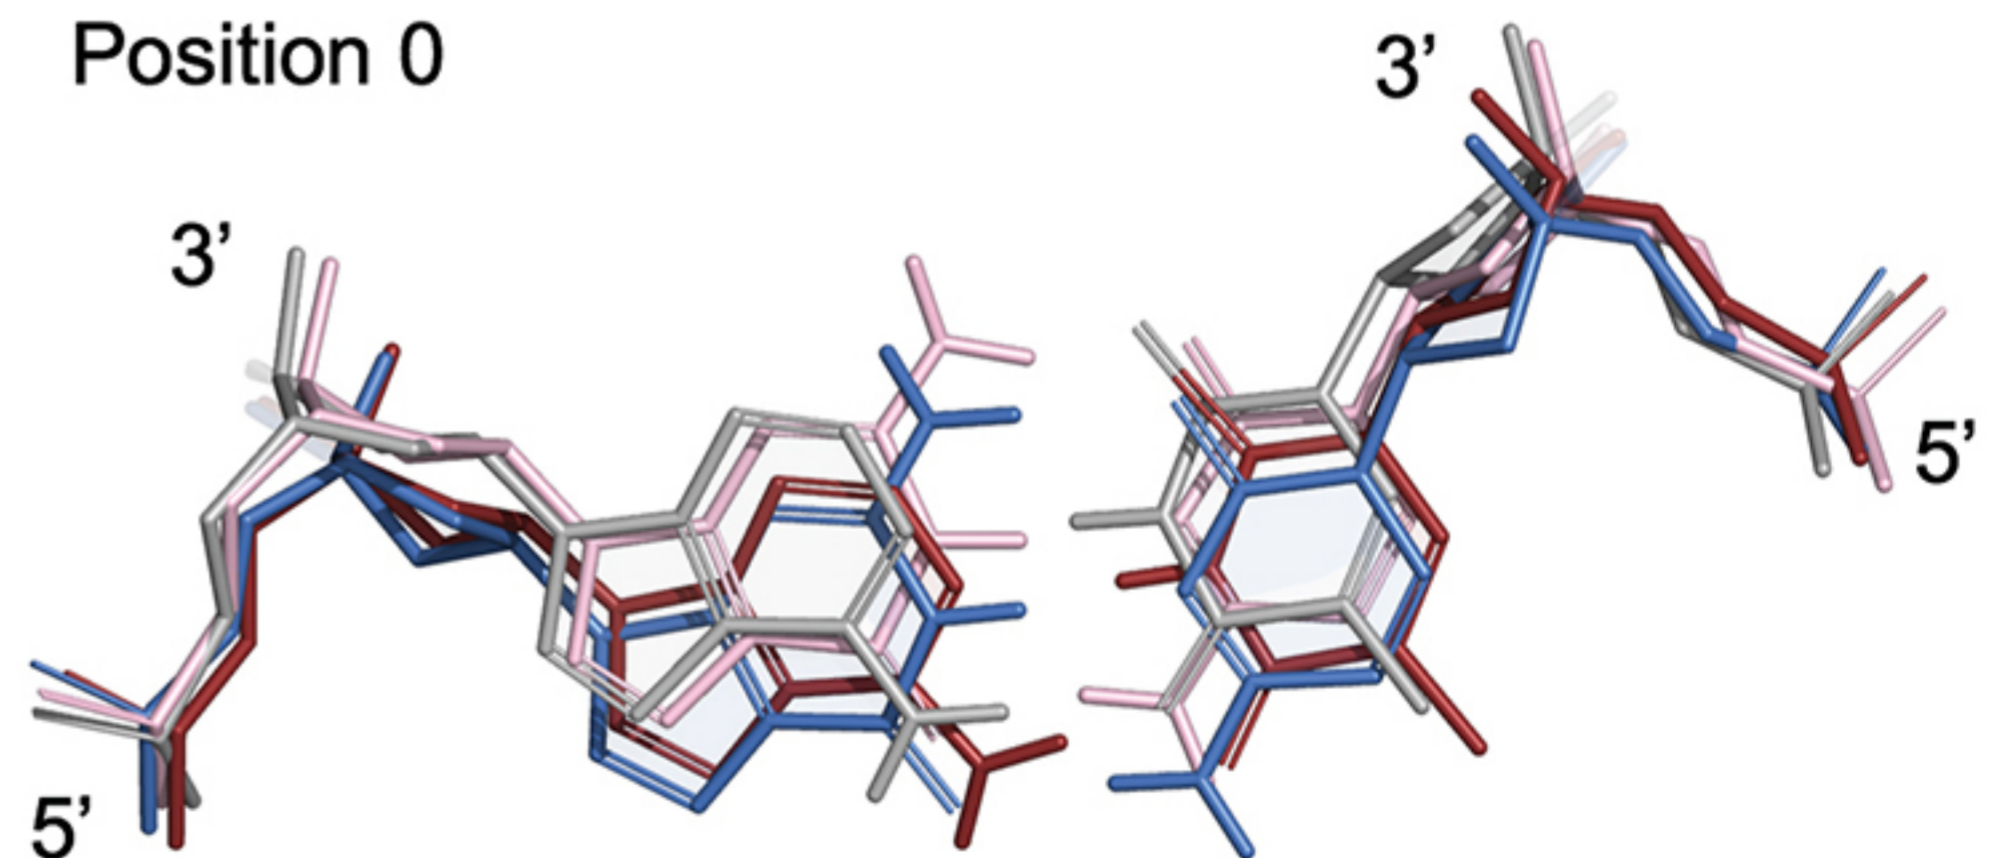

Position +1

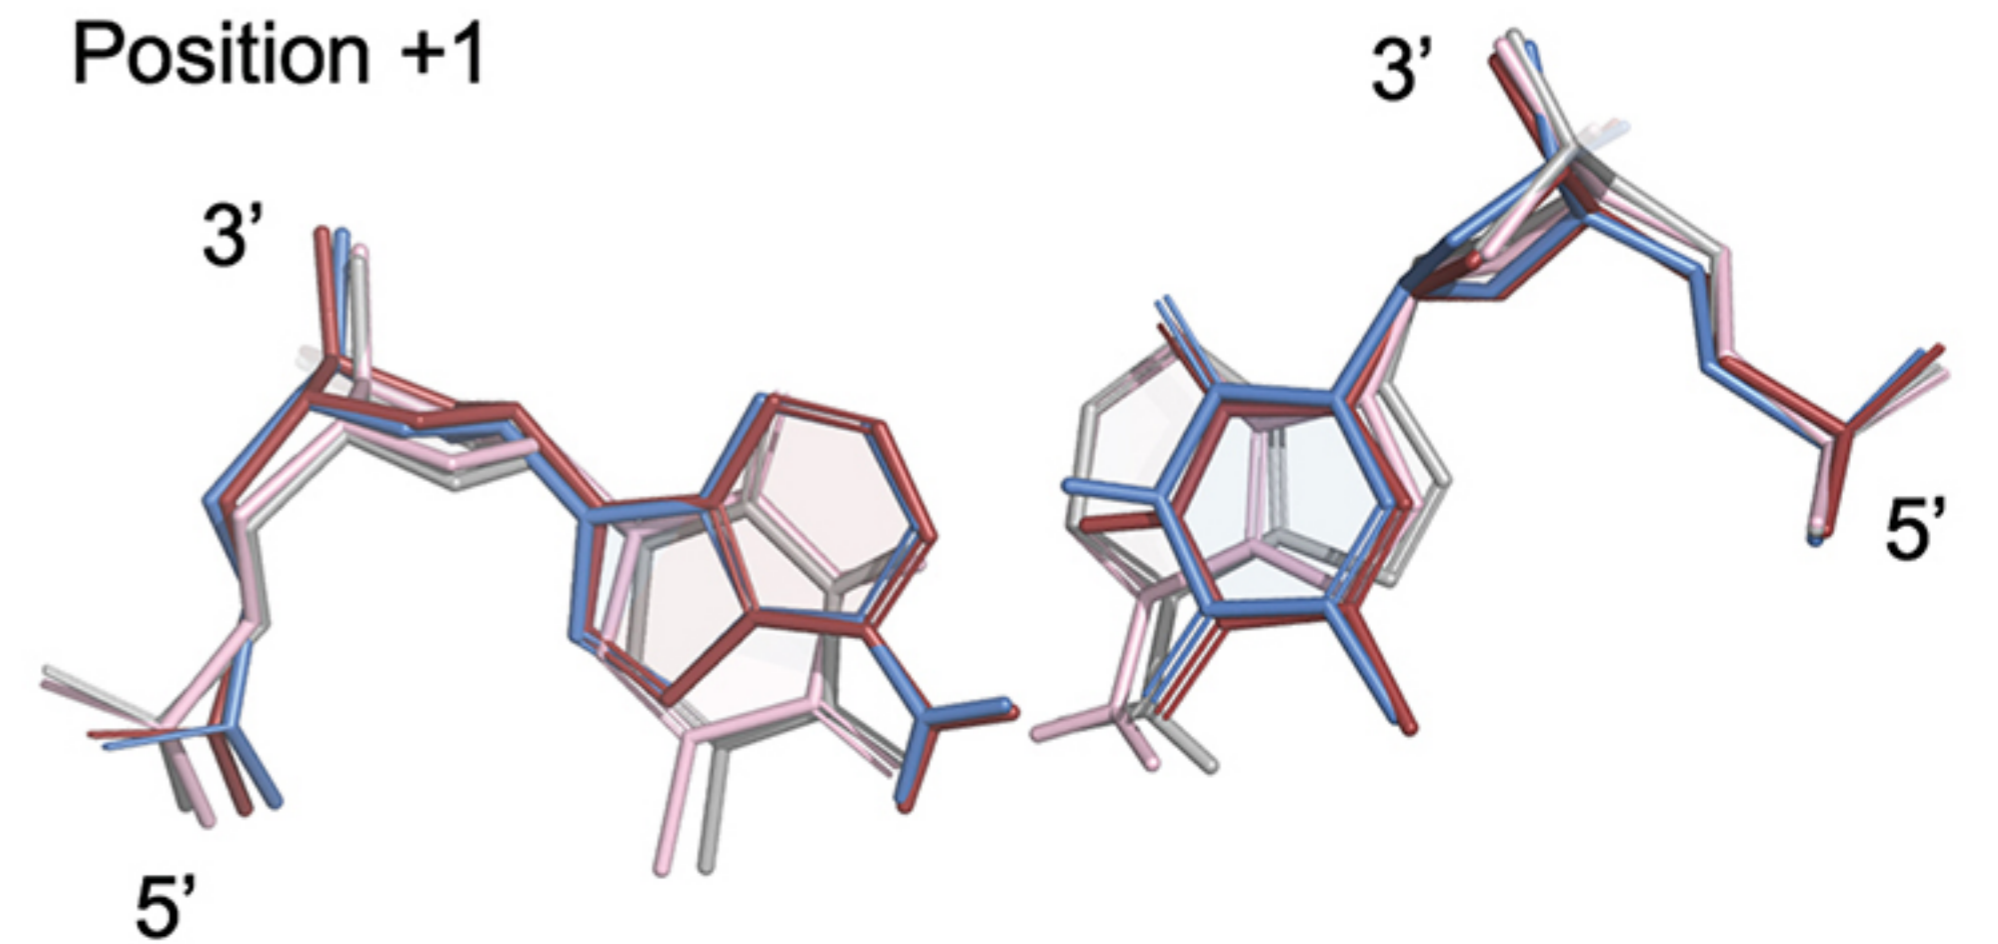

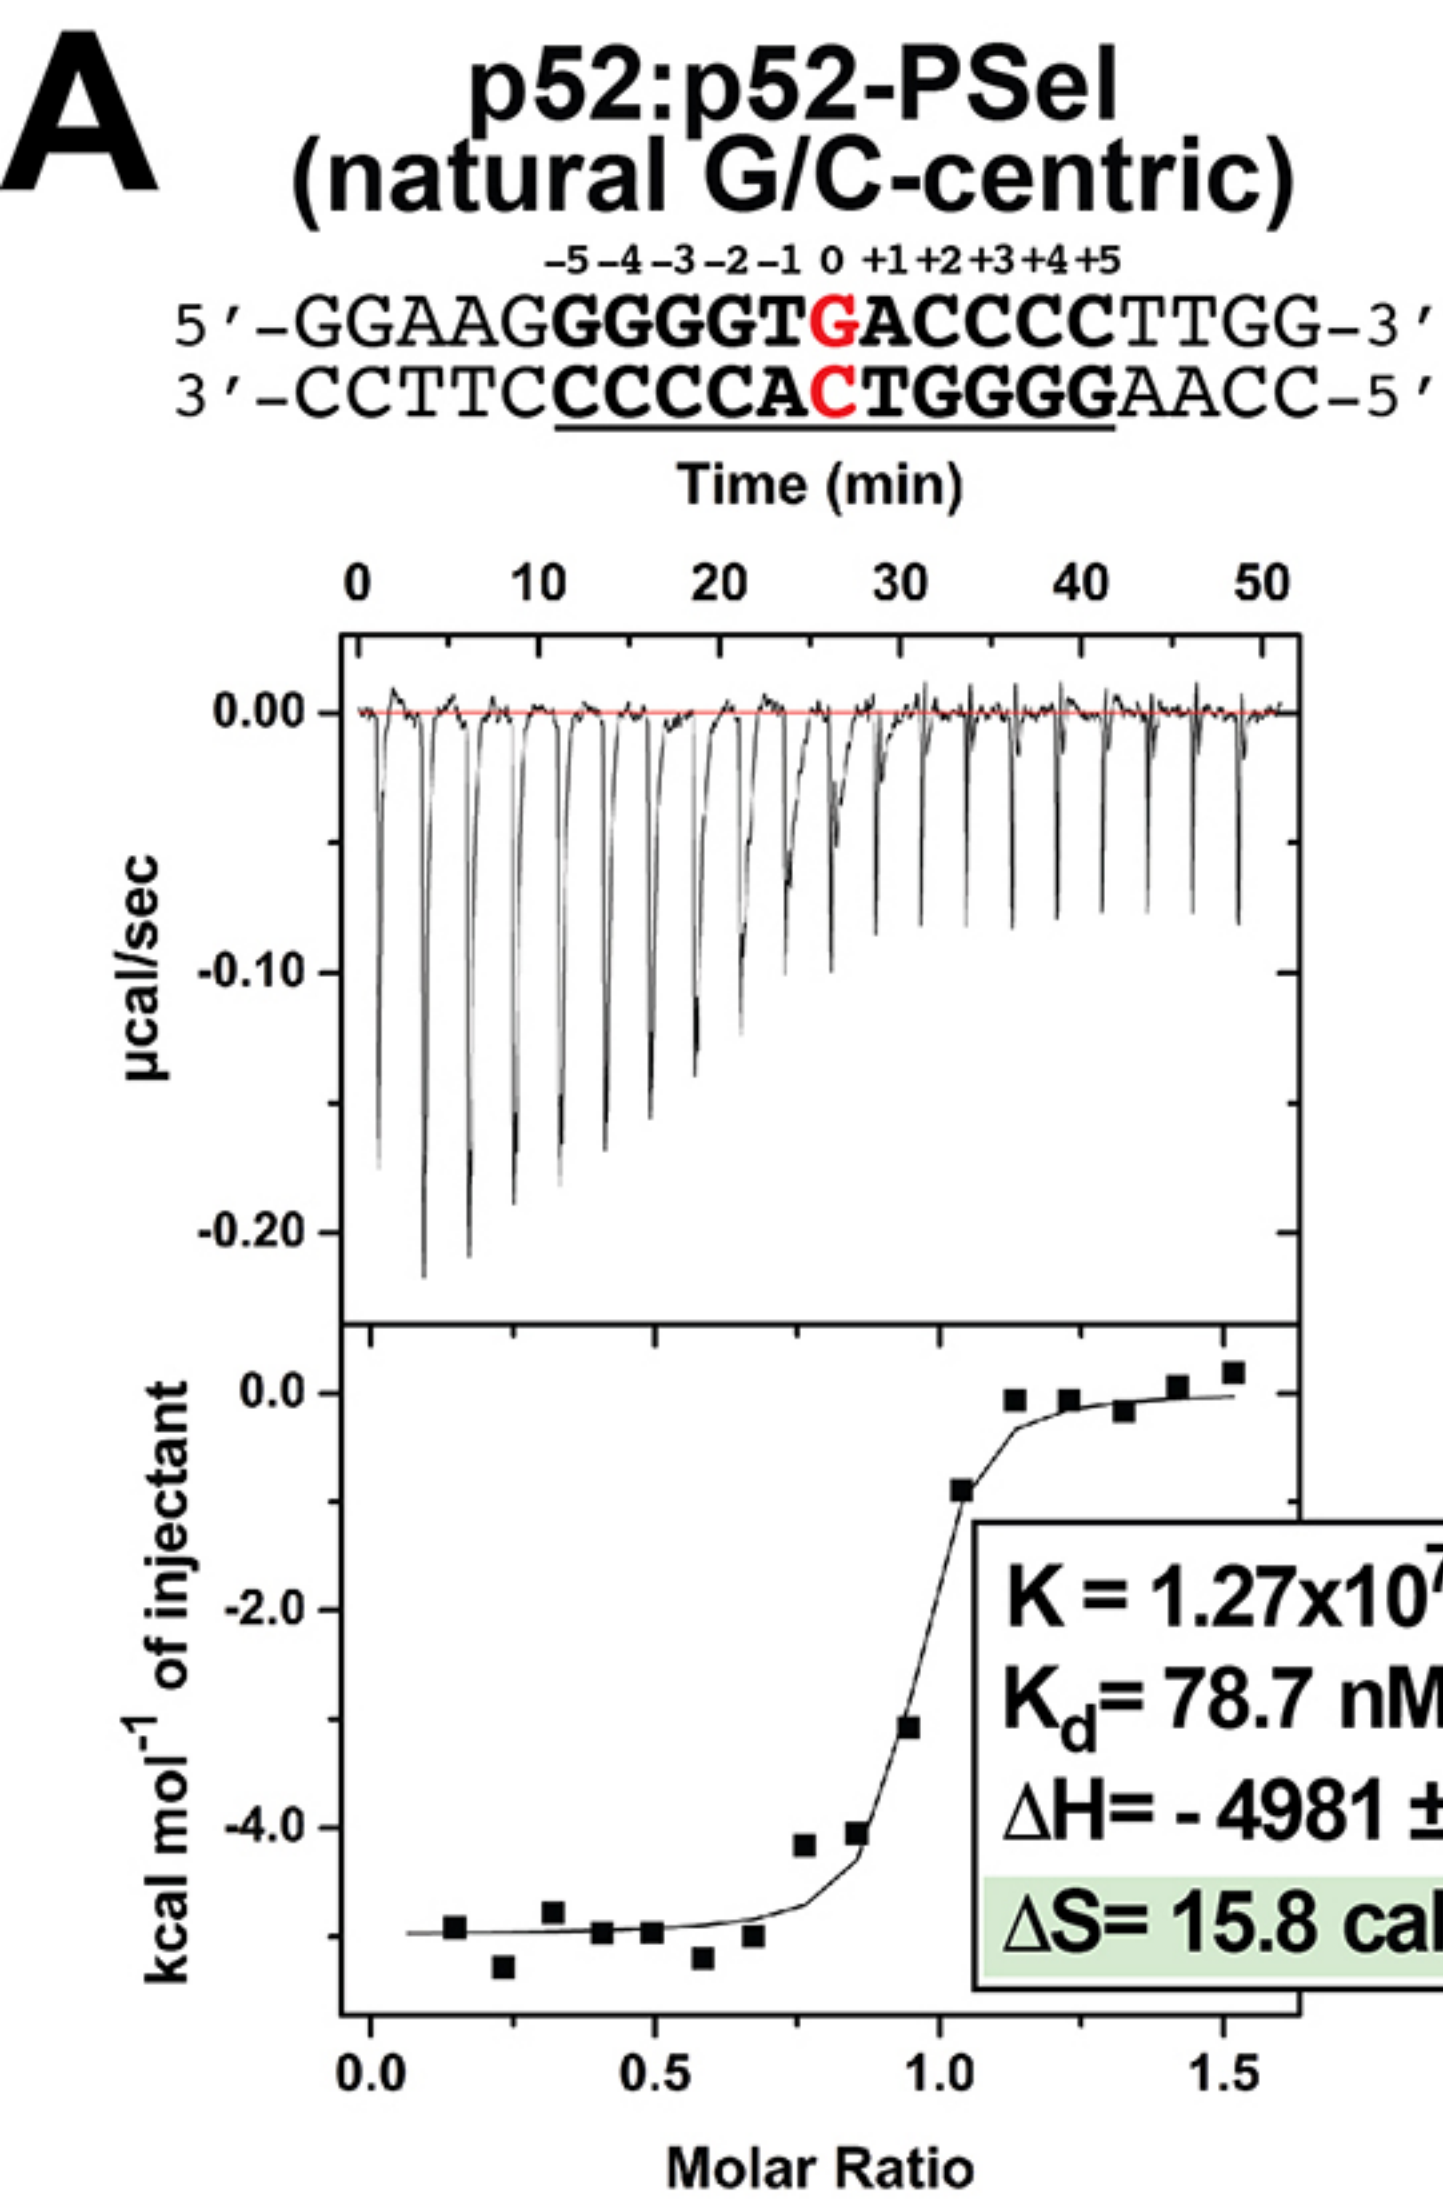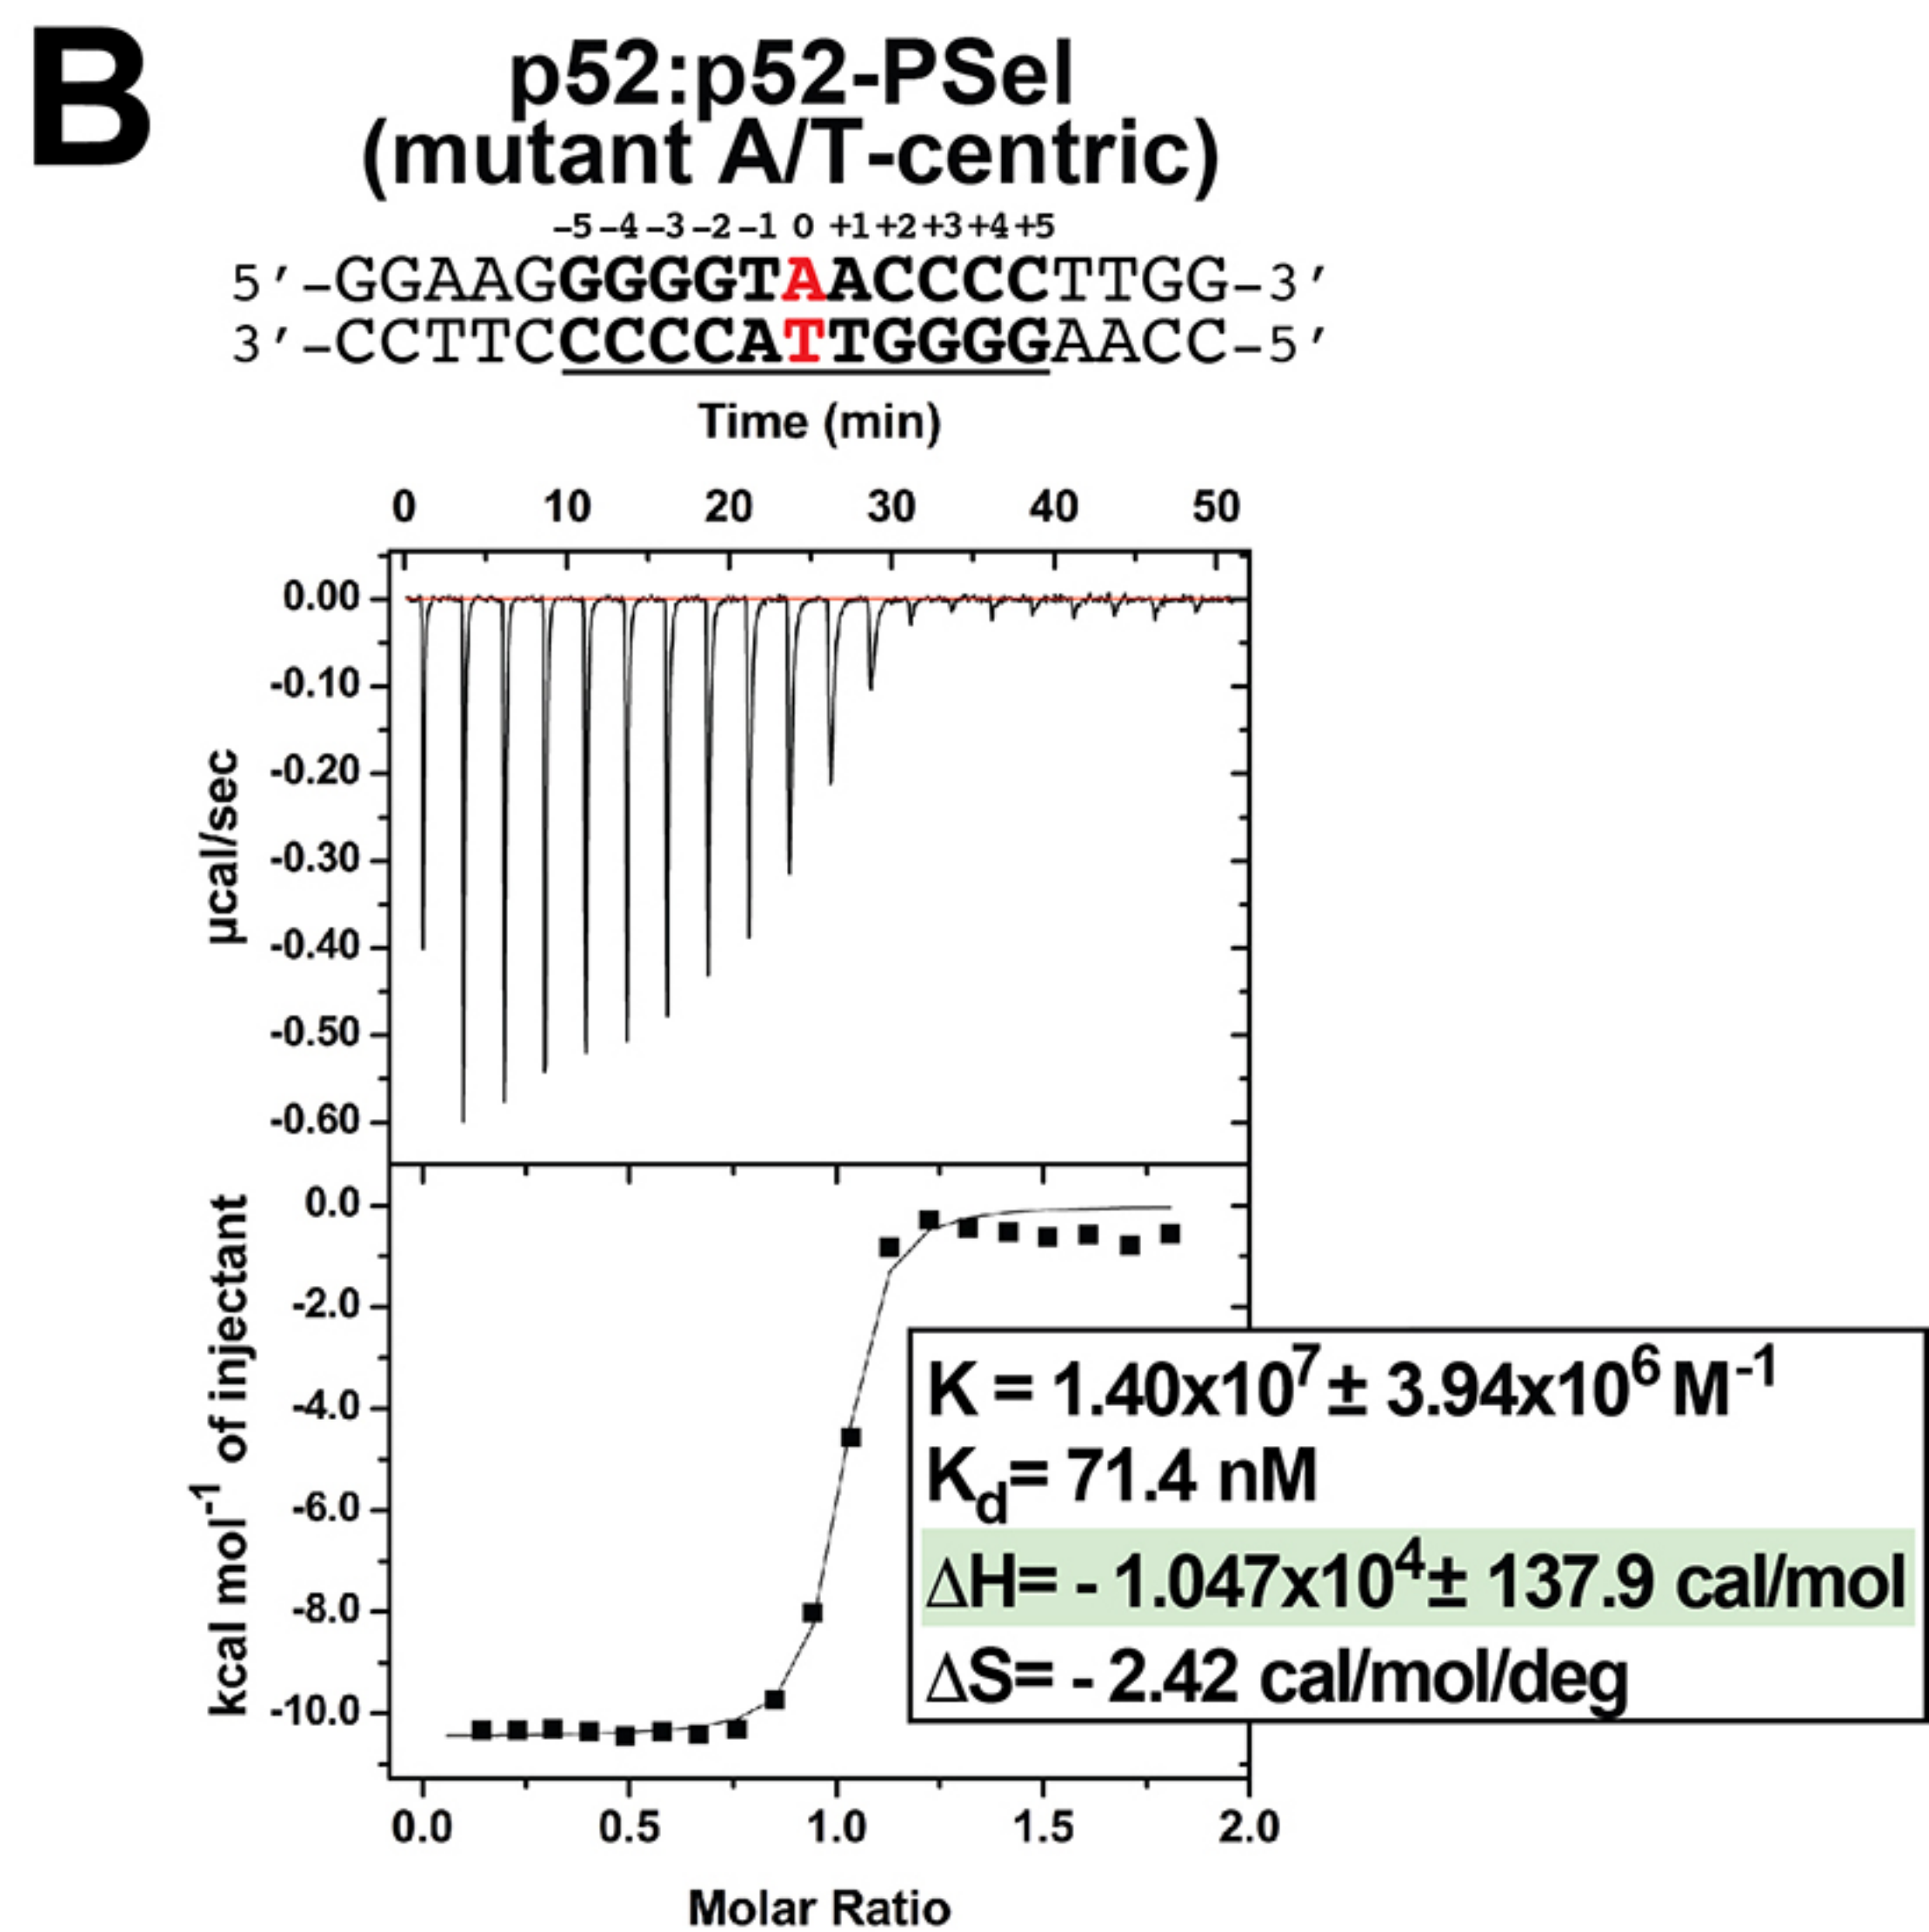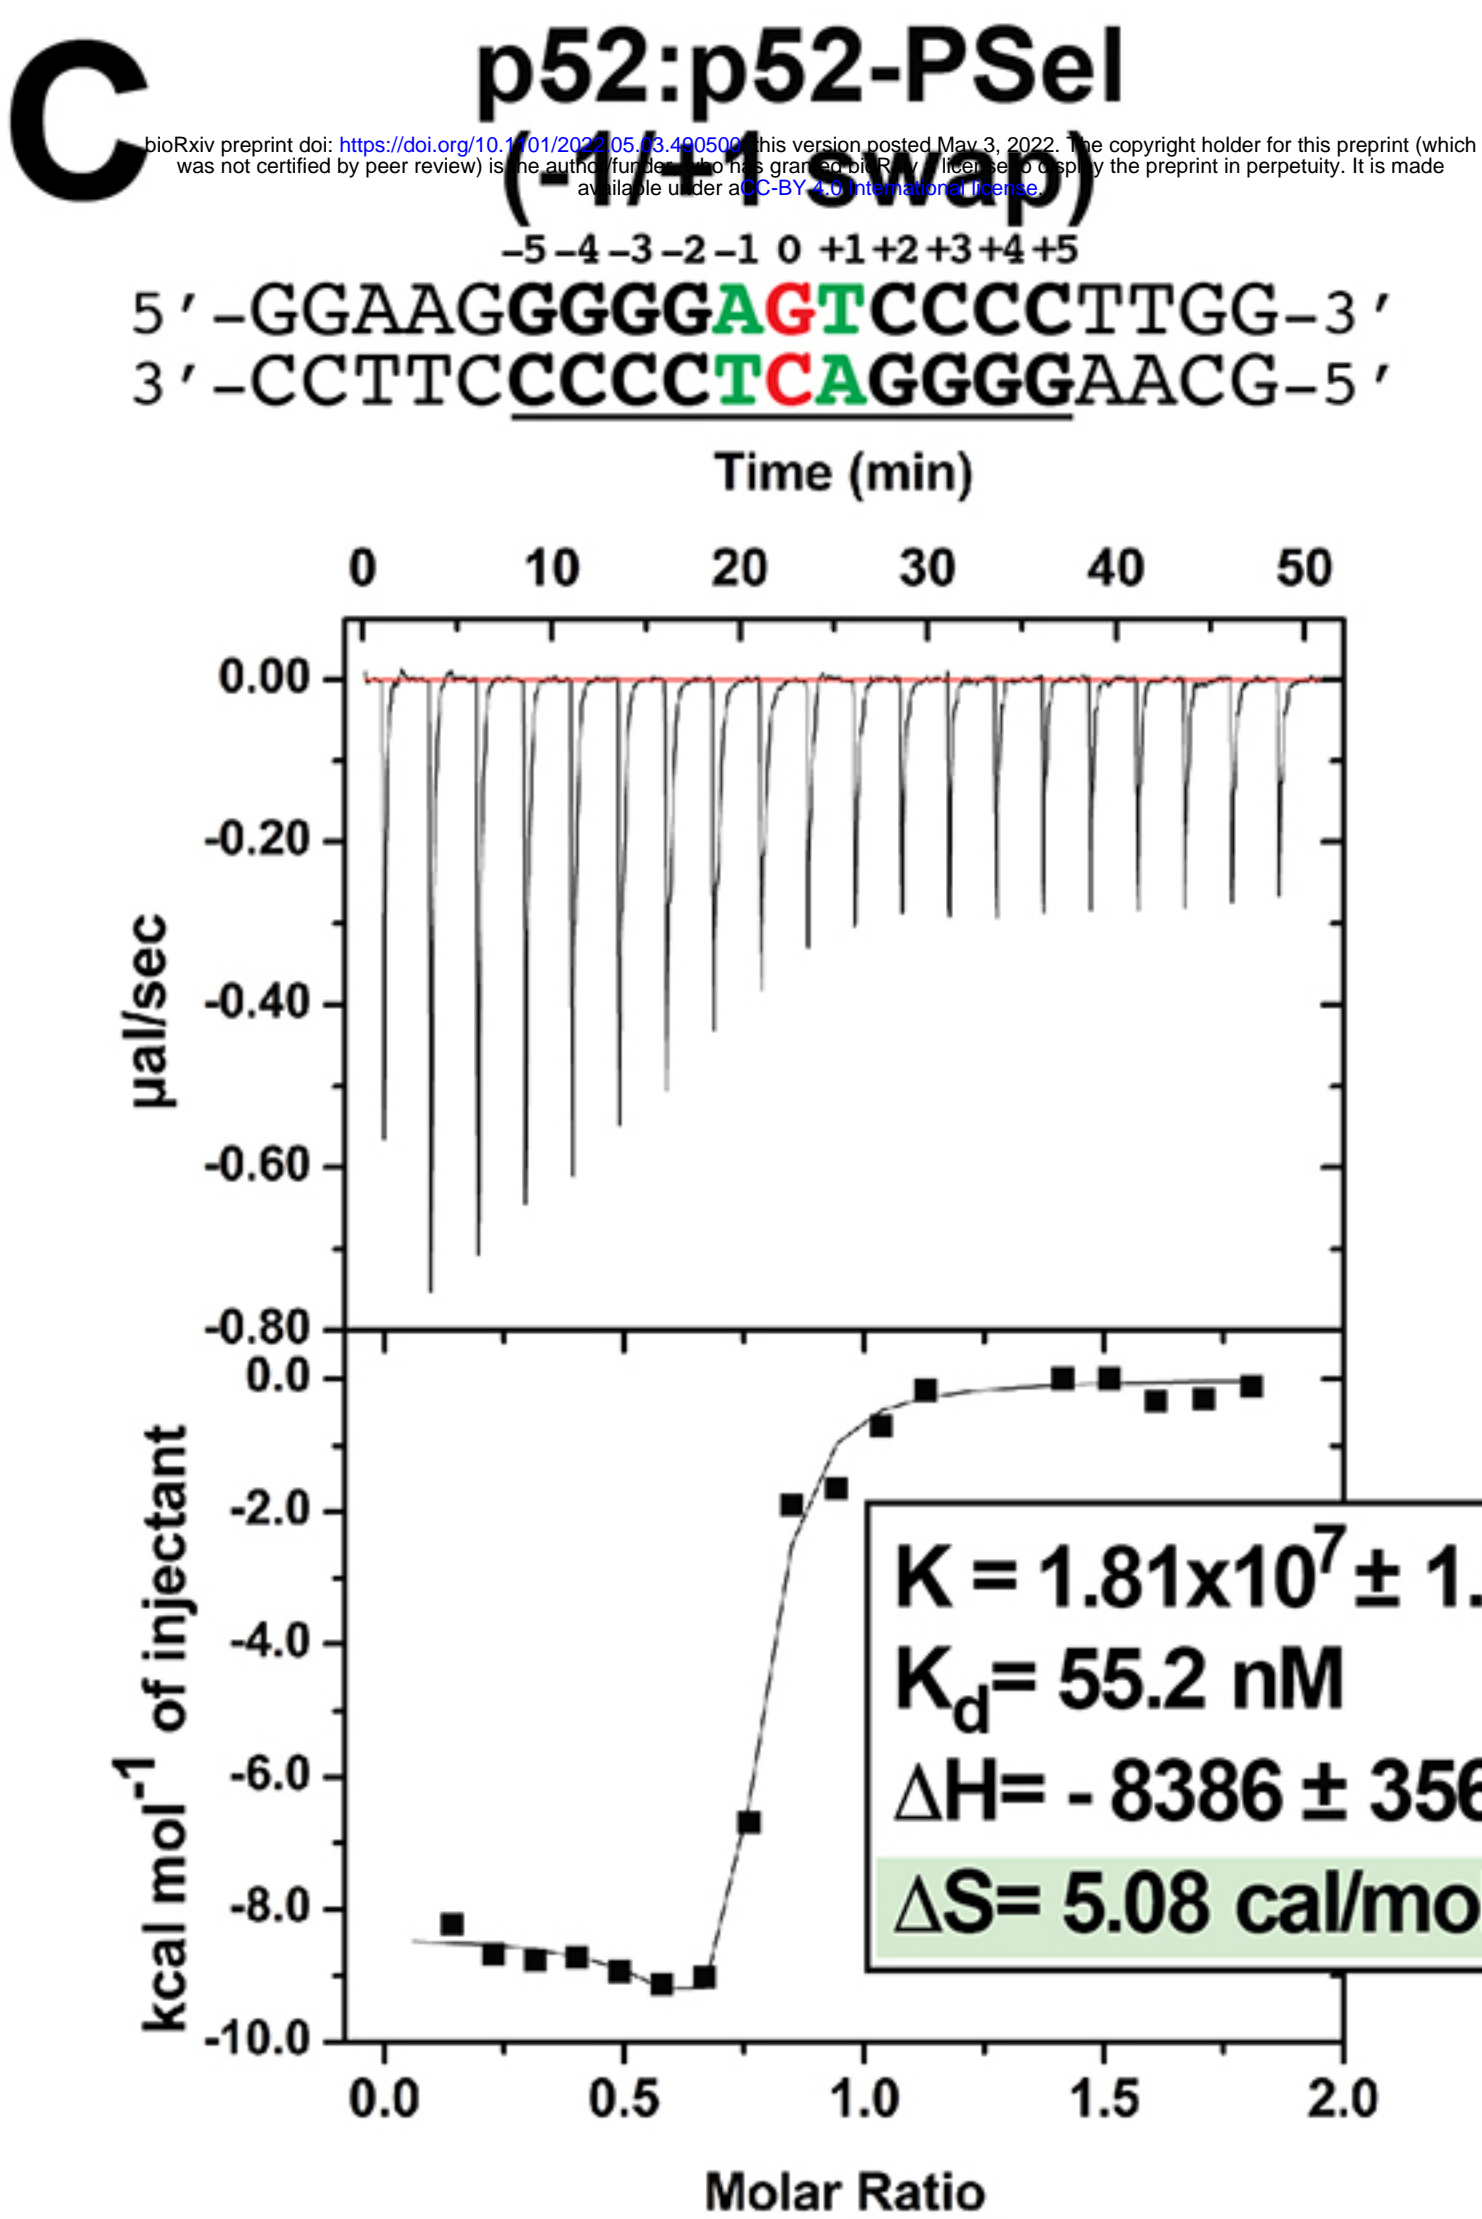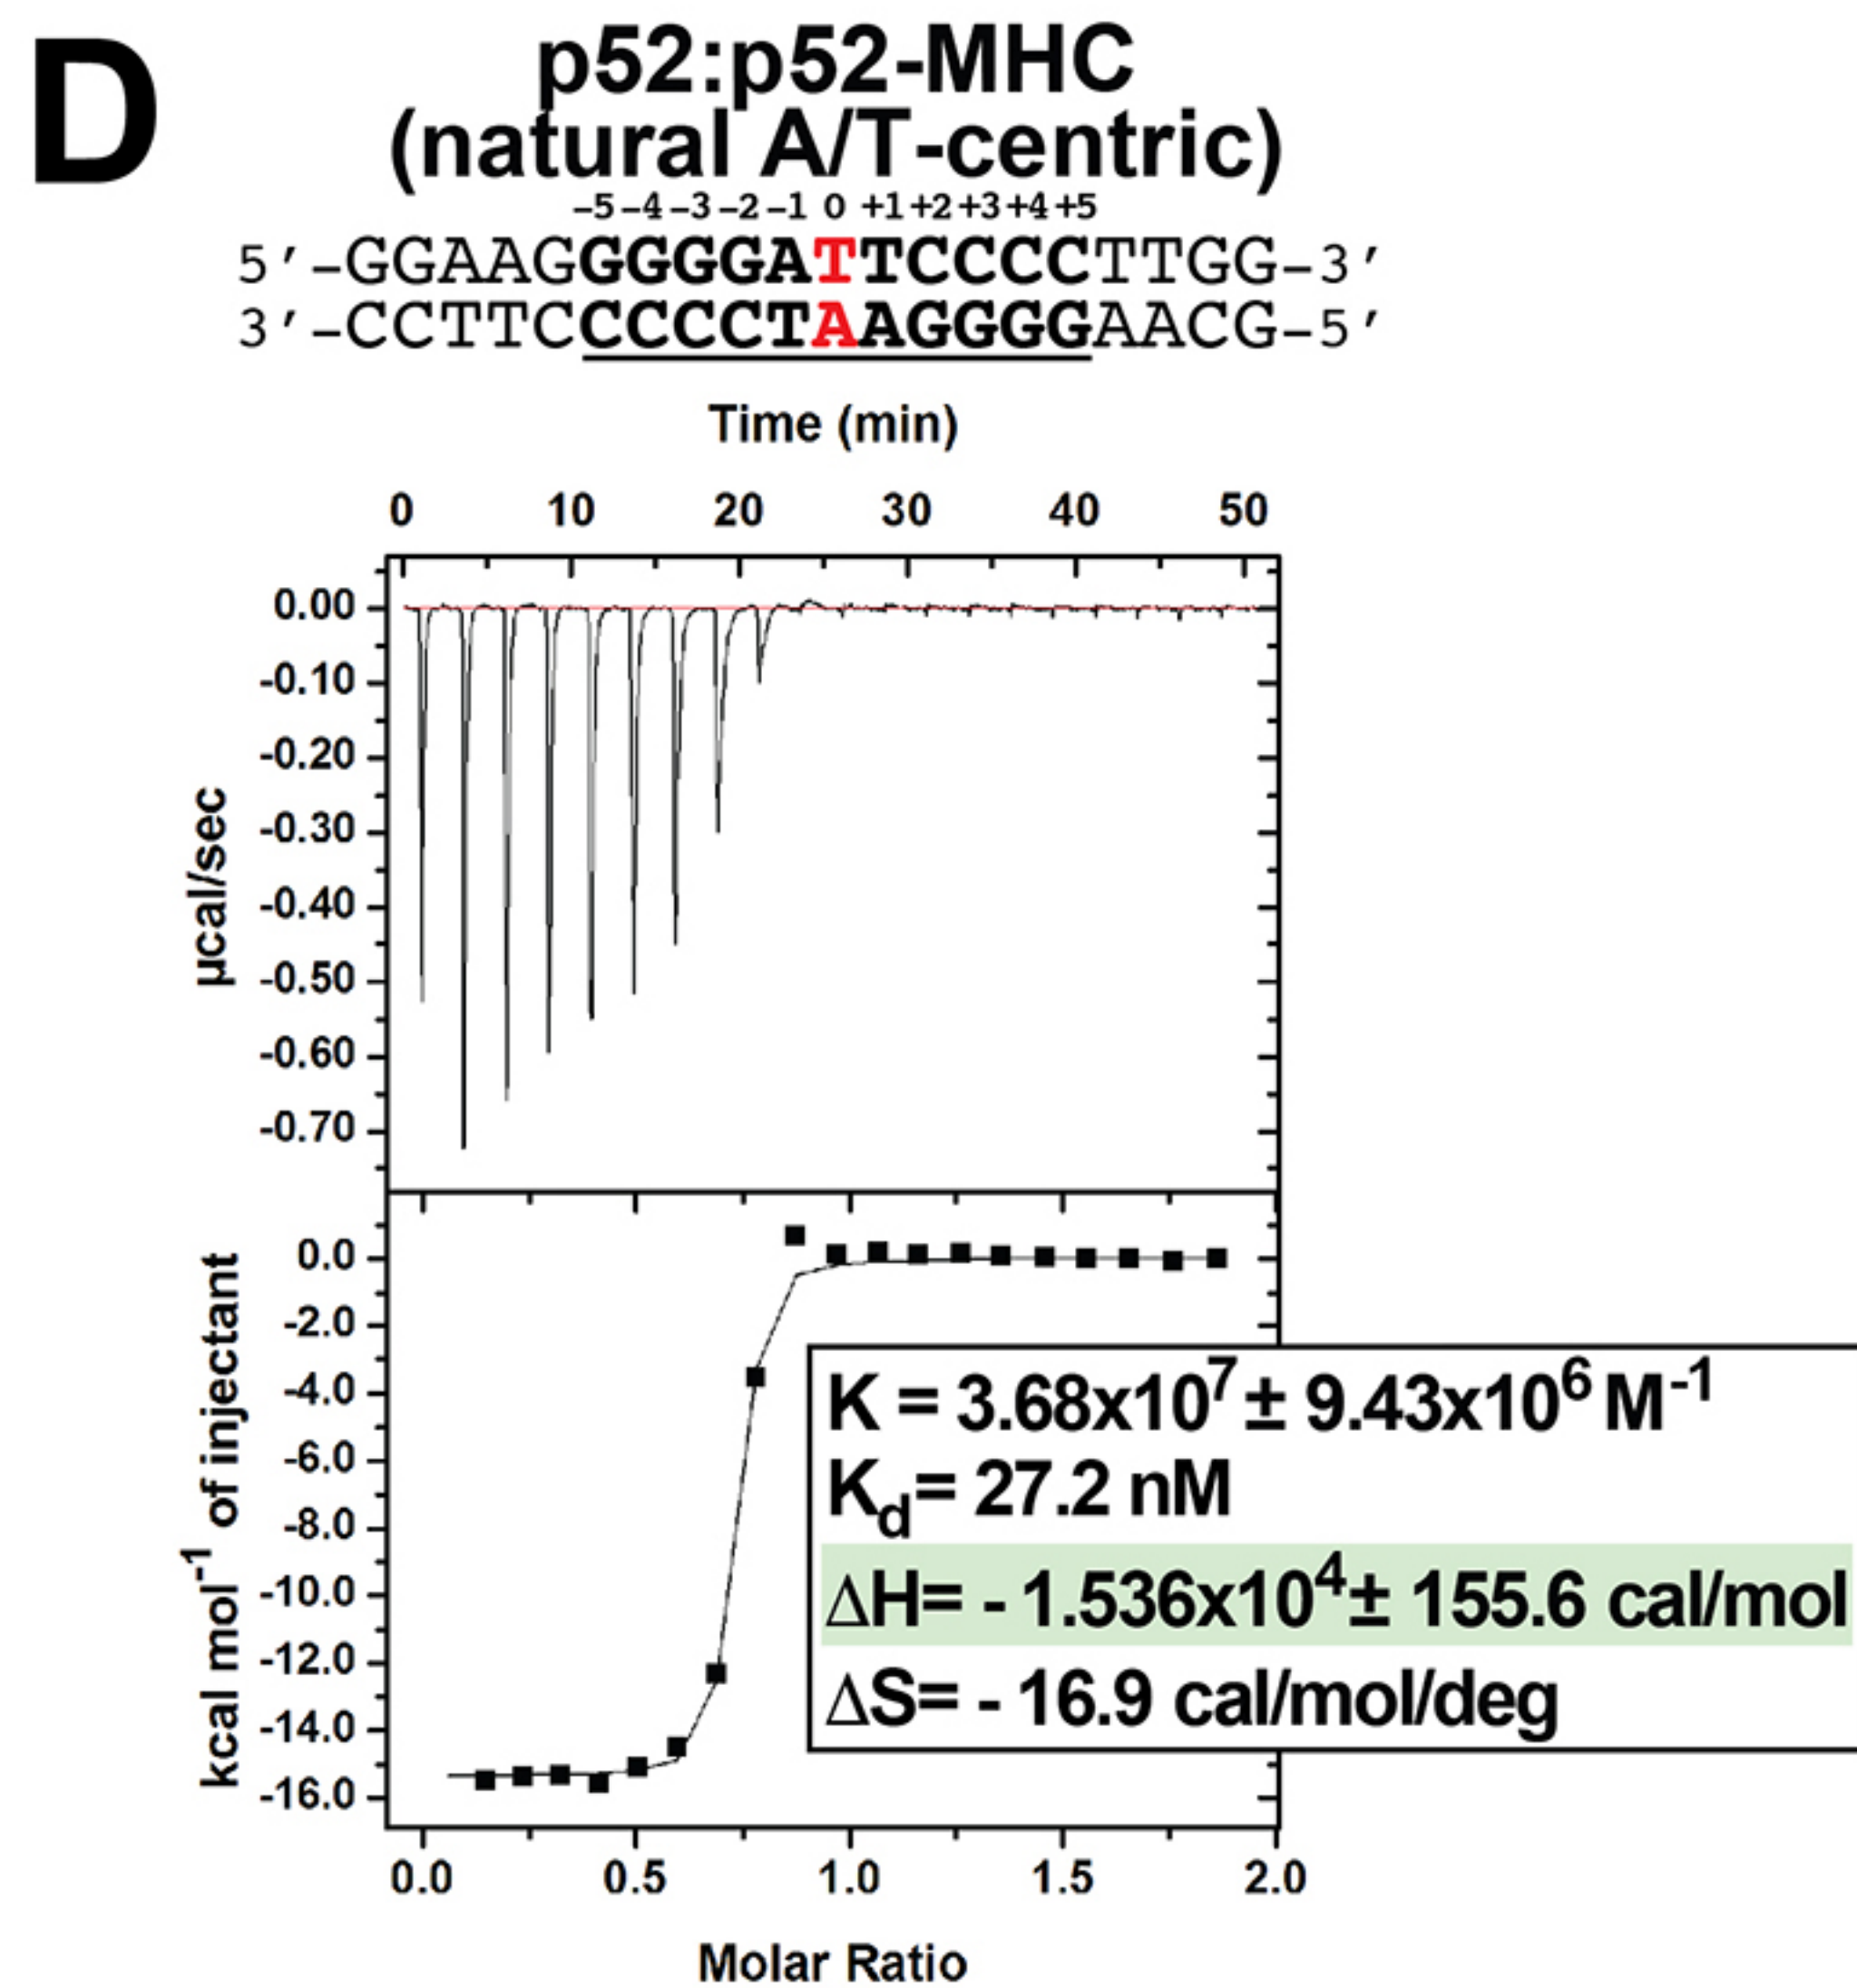



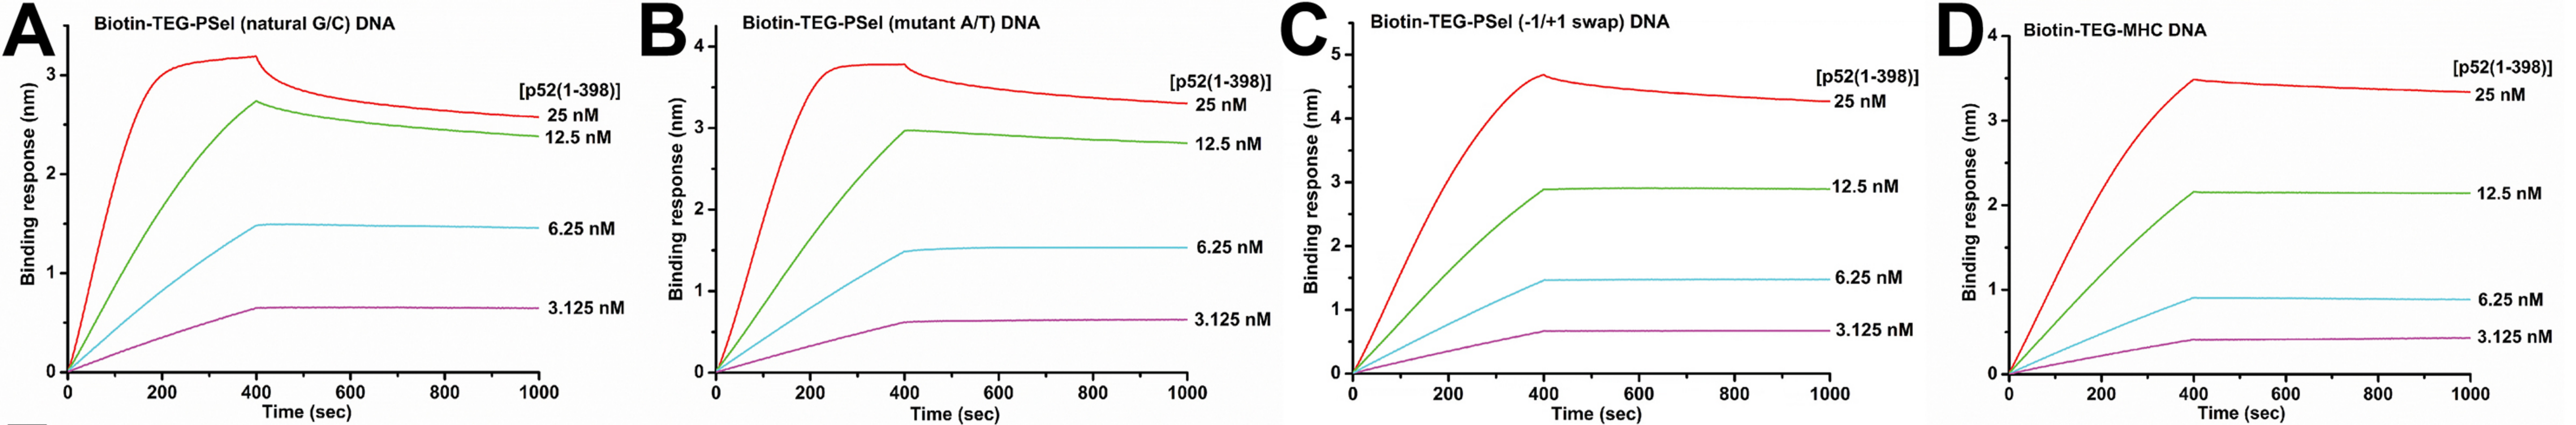

### E Kinetic analysis of p52:p52 homodimer binding to various $\kappa$ B DNAs by BLI

|                                    | PSel(natural G/C-centric)                       | PSel(mutant A/T-centric)                        | PSel(-1/+1 swap)                                | MHC                                             |
|------------------------------------|-------------------------------------------------|-------------------------------------------------|-------------------------------------------------|-------------------------------------------------|
| $K_d$ (nM)                         | $0.95 \pm 0.019$ ( $0.86 \pm 0.022$ )           | $0.90 \pm 0.037$ ( $0.69 \pm 0.027$ )           | $0.66 \pm 0.03$ ( $0.57 \pm 0.02$ )             | $0.68 \pm 0.013$ ( $0.88 \pm 0.015$ )           |
| $k_{on}$ ( $M^{-1} \cdot s^{-1}$ ) | $2.91 \times 10^5$ ( $2.68 \times 10^5$ )       | $1.67 \times 10^5$ ( $2.00 \times 10^5$ )       | $1.31 \times 10^5$ ( $1.58 \times 10^5$ )       | $0.90 \times 10^5$ ( $1.01 \times 10^5$ )       |
| $k_{off}$ ( $s^{-1}$ )             | $2.55 \times 10^{-4}$ ( $2.51 \times 10^{-4}$ ) | $1.50 \times 10^{-4}$ ( $1.32 \times 10^{-4}$ ) | $0.86 \times 10^{-4}$ ( $0.90 \times 10^{-4}$ ) | $0.61 \times 10^{-4}$ ( $0.89 \times 10^{-4}$ ) |

Values reported represent the global fit to the data using 1:1 binding model shown in (A - D). The experiments were done in duplicate, shown in parentheses.

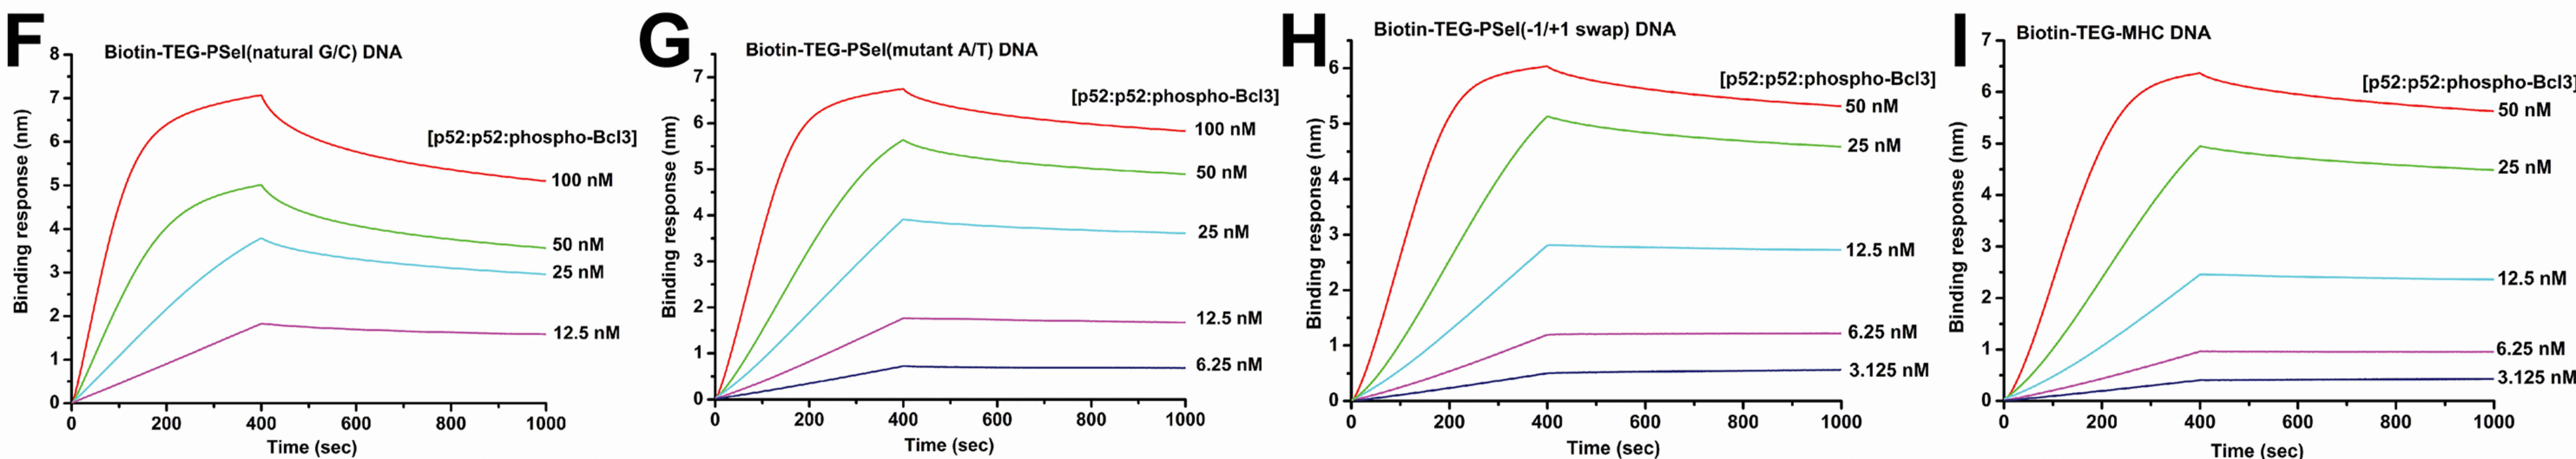

### J Kinetic analysis of p52:p52:Bcl3 complex binding to various $\kappa$ B DNAs by BLI

|                                    | PSel(natural G/C-centric)                       | PSel(mutant A/T-centric)                        | PSel(-1/+1 swap)                                | MHC                                             |
|------------------------------------|-------------------------------------------------|-------------------------------------------------|-------------------------------------------------|-------------------------------------------------|
| $K_d$ (nM)                         | $5.21 \pm 0.06$ ( $5.43 \pm 0.06$ )             | $2.93 \pm 0.07$ ( $2.91 \pm 0.06$ )             | $1.62 \pm 0.06$ ( $1.64 \pm 0.05$ )             | $2.62 \pm 0.08$ ( $3.31 \pm 0.10$ )             |
| $k_{on}$ ( $M^{-1} \cdot s^{-1}$ ) | $1.06 \times 10^5$ ( $1.0 \times 10^5$ )        | $0.69 \times 10^5$ ( $0.71 \times 10^5$ )       | $0.99 \times 10^5$ ( $1.08 \times 10^5$ )       | $0.62 \times 10^5$ ( $0.52 \times 10^5$ )       |
| $k_{off}$ ( $s^{-1}$ )             | $5.52 \times 10^{-4}$ ( $5.45 \times 10^{-4}$ ) | $2.01 \times 10^{-4}$ ( $2.07 \times 10^{-4}$ ) | $1.61 \times 10^{-4}$ ( $1.76 \times 10^{-4}$ ) | $1.63 \times 10^{-4}$ ( $1.71 \times 10^{-4}$ ) |

Values reported represent the global fit to the data using 1:1 binding model shown in (F - I). The experiments were done in duplicate, shown in parentheses.

| $\kappa$ B DNA | Fold Change         | $K_d$ Ratio = $\frac{K_d(X \text{ DNA})}{K_d(\text{PSel G/C-centric})}$ |                    | $k_{on}$ Ratio = $\frac{k_{on}(X \text{ DNA})}{k_{on}(\text{PSel G/C-centric})}$ |                    | $k_{off}$ Ratio = $\frac{k_{off}(X \text{ DNA})}{k_{off}(\text{PSel G/C-centric})}$ |                    | $RLU$ Ratio = $\frac{RLU(X \text{ DNA})}{RLU(\text{PSel G/C-centric})}$ |
|----------------|---------------------|-------------------------------------------------------------------------|--------------------|----------------------------------------------------------------------------------|--------------------|-------------------------------------------------------------------------------------|--------------------|-------------------------------------------------------------------------|
|                |                     | (p52:p52)-DNA                                                           | (p52:p52:Bcl3)-DNA | (p52:p52)-DNA                                                                    | (p52:p52:Bcl3)-DNA | (p52:p52)-DNA                                                                       | (p52:p52:Bcl3)-DNA | (p52:p52:Bcl3)-DNA                                                      |
| PSel           | natural G/C-centric | 1.00                                                                    | 1.00               | 1.00                                                                             | 1.00               | 1.00                                                                                | 1.00               | 1.00                                                                    |
|                | mutant A/T-centric  | 0.88                                                                    | 0.55               | 0.66                                                                             | 0.68               | 0.56                                                                                | 0.37               | 0.55                                                                    |
|                | -1/+1 swap          | 0.68                                                                    | 0.31               | 0.52                                                                             | 1.01               | 0.35                                                                                | 0.31               | 0.09                                                                    |
| MHC            |                     | 0.86                                                                    | 0.56               | 0.34                                                                             | 0.55               | 0.30                                                                                | 0.30               | 0.26                                                                    |

## **Supplemental Information**

### **Structures of NF- $\kappa$ B p52 homodimer-DNA complexes rationalize binding mechanisms and transcription activation**

Vladimir A. Meshcheryakov, Wenfei Pan, Tianjie Li, Yi Wang, Gourisankar Ghosh, and Vivien Ya-Fan Wang

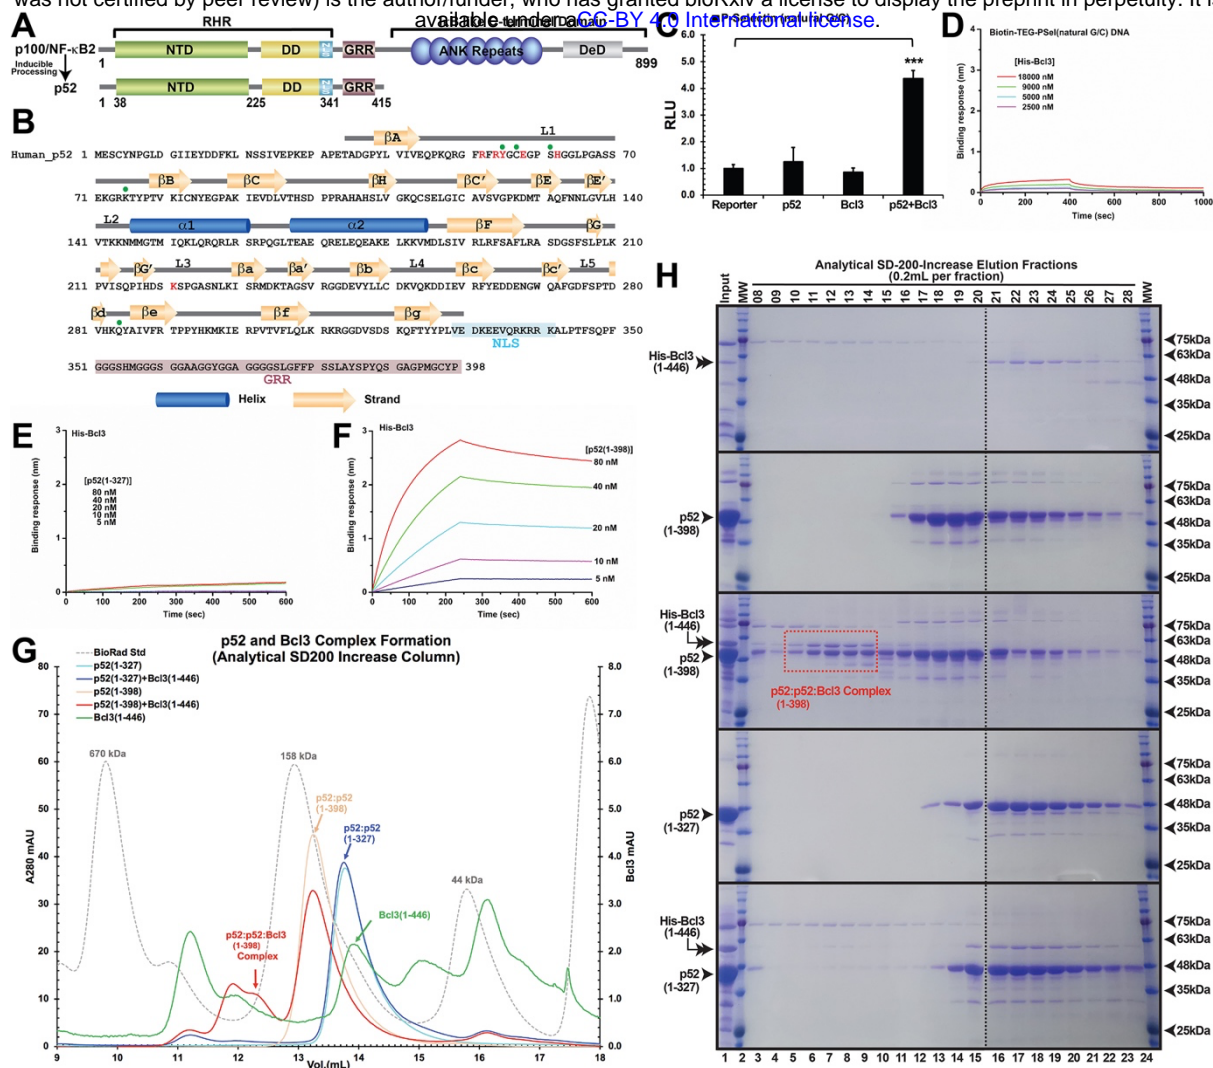

**Figure S1. p52 and DNA crystallization.** (A) Domain organization of the precursor protein p100/NF-κB2 and the processed p52. (B) Primary sequence of human p52 RHR. The secondary structures are mapped on top of the sequence. DNA base-specific contacting residues are denoted by red and backbone contacting residues are marked by green circle. NLS and GRR regions are highlighted in cyan and purple, respectively. (C) Co-expression of p52 and Bcl3, but not either one alone, activates the natural PSeI luciferase reporter. The data were analyzed from three independent experiments performed in triplicate. RLU, relative luciferase unit. \*\*\*p<0.001 (t test). Error bars represent SD. (D) Biolayer interferometry (BLI) binding analysis of His-tagged-Bcl3 protein to immobilized biotin labeled natural PSeI-κB DNA; the result indicated Bcl3 does not interact with κB DNA without p52 protein. (E-F) BLI binding analysis of (E) short p52:p52 (aa 1-327) and (F) long p52:p52 (aa 1-398) protein to immobilized His-tagged-Bcl3. The results showed only the long p52:p52 (aa 1-398) interacts with Bcl3 in (F). (G) Analytical Superdex-200-Increase size exclusion chromatography elution profile showing the long p52:p52 (aa 1-398) but not the short p52:p52 (aa 1-327) homodimer forms complex with Bcl3. (H) SDS-PAGE analysis indicating the p52:p52:Bcl3 complex formation in (G).

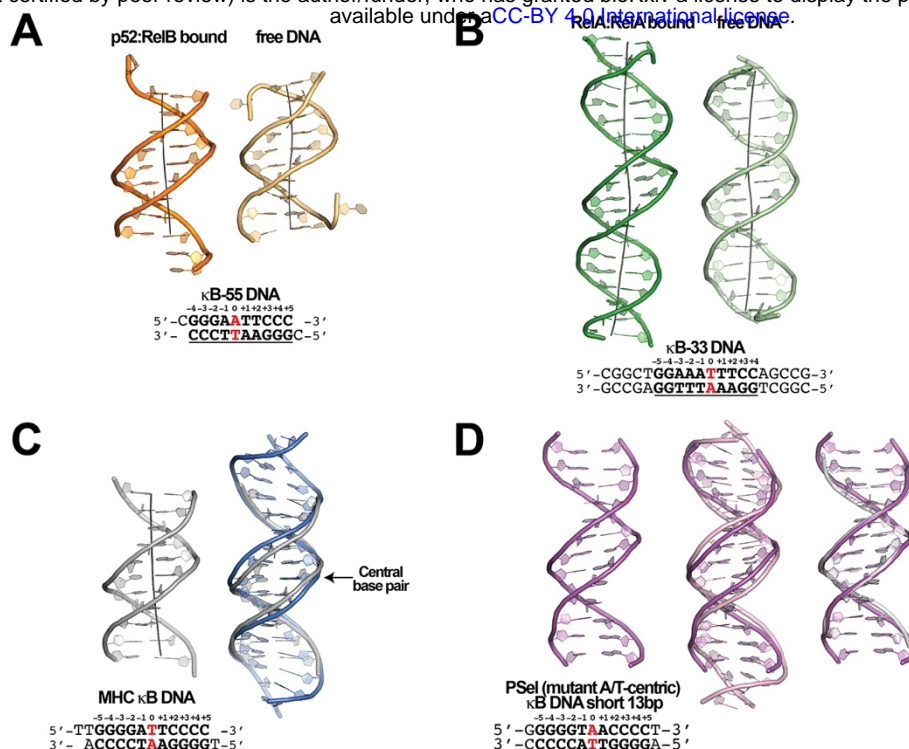

**E**

| NF-κB Dimers | Protein Constructs (aa)   | Electron Density (aa) | κB DNA Sequences                                                                                                                                                 | DNA Minor Groove Width (-1 to 0 position) | PDB  |
|--------------|---------------------------|-----------------------|------------------------------------------------------------------------------------------------------------------------------------------------------------------|-------------------------------------------|------|
| p50:p50      | 39-364                    | 39-350                | <b>κB-55</b><br><sup>-5 -4 -3 -2 -1 0 +1 +2 +3 +4</sup><br>5' -TGGGGAATTCCC -3'<br>3' -CCCTAAGGGT-5'                                                             | 3.5 Å                                     | 1NFK |
|              | 2-364                     | 43-353                | 5' -AGATGGGGAATCCCTTAGA-3'<br>3' -AGATCCCTAAGGGTAGA-5'                                                                                                           | 3.9 Å                                     | 1SVC |
| RelA:RelA    | 19-291                    | 19-291                | <b>κB-33</b><br><sup>-5 -4 -3 -2 -1 0 +1 +2 +3 +4</sup><br>5' -CGGCTGGAAATTCCAGCCG-3'<br>3' -GCCGAGTTTAAGGTCGGC-5'                                               | 4.1 Å                                     | 1RAM |
|              | 19-304                    | 19-291                | <b>E-selectin (mutant tandem sites)</b><br><sup>-5 -4 -3 -2 -1 0 +1 +2 +3 +4 +5</sup><br>5' -TAGCGGGAATTCCTGGGAATTCCCGCT-3'<br>3' -TCGCCCTTAAGGCCCTTAAGGCCGAT-5' | 3.8 Å; 3.4 Å                              | 5U01 |
| p50:RelA     | p50 39-364<br>RelA 19-291 | 43-353<br>19-291      | <b>Ig-κB</b><br><sup>-5 -4 -3 -2 -1 0 +1 +2 +3 +4</sup><br>5' -TGGGGACTTTC -3'<br>3' -CCCTGAAGGA-5'                                                              | 3.9 Å                                     | 1VKX |
|              | p50 39-350<br>RelA 19-291 | 39-350<br>19-291      | <b>Ig/HIV-2</b><br><sup>-5 -4 -3 -2 -1 0 +1 +2 +3 +4</sup><br>5' -TGGGACTTTCCT-3'<br>3' -ACCTGAAGGA-5'                                                           | 3.9 Å                                     | 1LE9 |
|              | p50 39-350<br>RelA 19-291 | 43-350<br>19-291      | <b>IFNβ</b><br><sup>-5 -4 -3 -2 -1 0 +1 +2 +3 +4</sup><br>5' -TGGGGAATTCCT-3'<br>3' -CCCTTAAGGAA-5'                                                              | 3.4 Å                                     | 1LE5 |
|              | p50 39-350<br>RelA 19-291 | 43-350<br>19-291      | <b>IFNβ</b><br><sup>-5 -4 -3 -2 -1 0 +1 +2 +3 +4</sup><br>5' -AGTGGGGAATTCCTCTG-3'<br>3' -TCACCCCTTAAGGAGAC-5'                                                   | 3.6 Å                                     | 2I9T |
| c-Rel:c-Rel  | 7-281                     | 7-281                 | <b>IL-2</b><br><sup>-4 -3 -2 -1 0 +1 +2 +3 +4</sup><br>5' -GGGTTAAAGAAATCCAGA-3'<br>3' -CCCAATTTCTTAAGGTCT-5'                                                    | 3.6 Å                                     | 1GJI |
| p52:p52      | 35-329                    | 37-327                | <b>MHC</b><br><sup>-5 -4 -3 -2 -1 0 +1 +2 +3 +4 +5</sup><br>5' -TTGGGGATTCCCC -3'<br>3' -ACCCCTAAGGGT-5'                                                         | 3.8 Å                                     | 1A3Q |
|              | 1-398                     | 34-329                | <b>P-selectin (natural G/C-centric)</b><br><sup>-5 -4 -3 -2 -1 0 +1 +2 +3 +4 +5</sup><br>5' -GAAGGGGGTCAACCCCTG-3' (this study)<br>3' -CTTCCCCACTGGGGAAAC-5'     | 7.7 Å                                     | 7CLI |
|              | 1-398                     | 34-329                | <b>P-selectin (mutant A/T-centric)</b><br><sup>-5 -4 -3 -2 -1 0 +1 +2 +3 +4 +5</sup><br>5' -GAAGGGGGTAACCCCTG-3' (this study)<br>3' -CTTCCCCATTGGGGAAAC-5'       | 7.4 Å                                     | 7VUQ |
|              | 1-398                     | 34-327                | <b>P-selectin (-1/+1 swap)</b><br><sup>-5 -4 -3 -2 -1 0 +1 +2 +3 +4 +5</sup><br>5' -GAAGGGGGAGTCCCTTG-3' (this study)<br>3' -CTTCCCCCTAGGGAAAC-5'                | 7.5 Å                                     | 7VUP |
| p50:RelB     | p50 37-363<br>RelB 1-400  | 38-350<br>100-378     | <b>κB-55</b><br><sup>-5 -4 -3 -2 -1 0 +1 +2 +3 +4</sup><br>5' -CGGGAATTCCC -3'<br>3' -CCCTAAGGGC-5'                                                              | 3.4 Å                                     | 2V2T |
|              | p52:RelB                  | 35-341<br>88-383      | <b>κB-55</b><br><sup>-5 -4 -3 -2 -1 0 +1 +2 +3 +4 +5</sup><br>5' -CGGGAATTCCC -3'<br>3' -CCCTAAGGGC-5'                                                           | 3.7 Å                                     | 3D07 |

**Figure S2.  $\kappa$ B DNA conformations.** (A) Structure of the  $\kappa$ B-55 DNA in the (Left) p52:RelB-bound and (Right) free forms; free  $\kappa$ B-55 DNA structure was obtained serendipitously where two  $\kappa$ B-55 DNA molecules were found in the crystal, with one bound to the p52:RelB heterodimer and the other remained free (Fusco et al., 2009). (B) Structure of the 20bp  $\kappa$ B-33 DNA in the (Left) RelA:RelA-bound (Chen et al., 1998) and (Right) free forms (Huang et al., 2005). (C) Structure of (Left) the 13bp MHC- $\kappa$ B DNA (Cramer et al., 1997) and (Right) overlay of natural G/C-centric PSeI- $\kappa$ B DNA (in blue) with MHC- $\kappa$ B DNA (in gray), showing the widened minor groove in PSeI- $\kappa$ B DNA. (D) Structure of (Left) short 13bp PSeI (mutant A/T)  $\kappa$ B DNA duplex in the co-crystal structure with short p52:p52 (aa 1-327) (in pink); overlay of 13bp PSeI (mutant A/T) DNAs (in pink) with (Middle) the long 18bp PSeI (mutant A/T) (in light pink), and (Right) the 13bp MHC- $\kappa$ B DNA (in gray). The DNA bps as observed in the co-crystal structures are shown in filled sticks. The view is onto the central minor groove. The nucleotide sequences used in co-crystallization are shown at the bottom, with  $\kappa$ B DNA underlined and numbering scheme indicated above. (E) Table showing various nucleotide sequences used in co-crystallization with different NF- $\kappa$ B dimers. The various NF- $\kappa$ B protein constructs used are also indicated. The  $\kappa$ B DNAs are shown in bold, bases making contacts with NF- $\kappa$ B proteins are underlined, and the numbering scheme are indicated. The central bps are highlighted in red. The p52 protein construct and DNA sequences used in the current study are in blue. The MGW(s) from position -1 to 0 are listed. Geometrical parameters were calculated with Curves+ (Blanchet et al., 2011, Lavery et al., 2009).

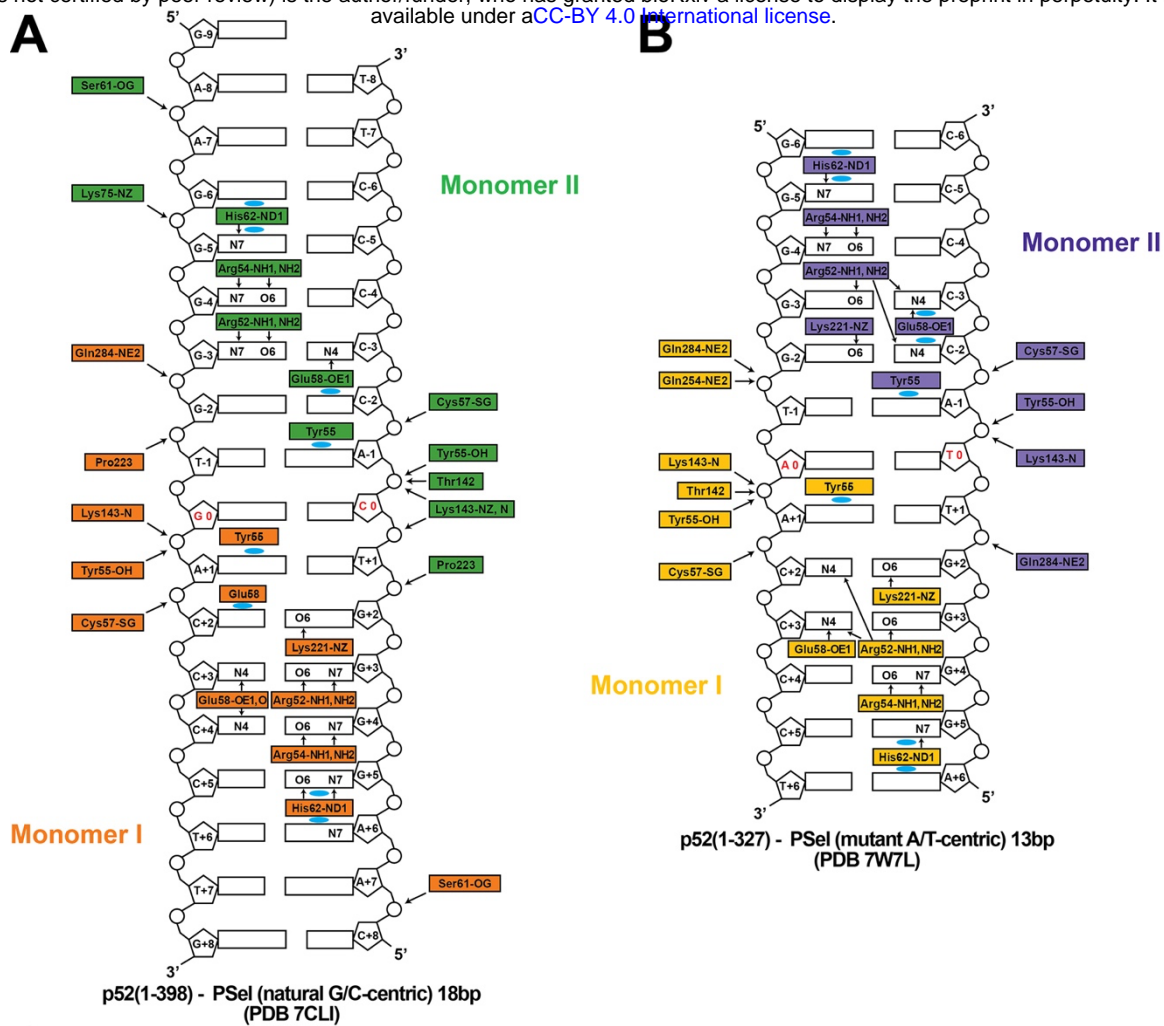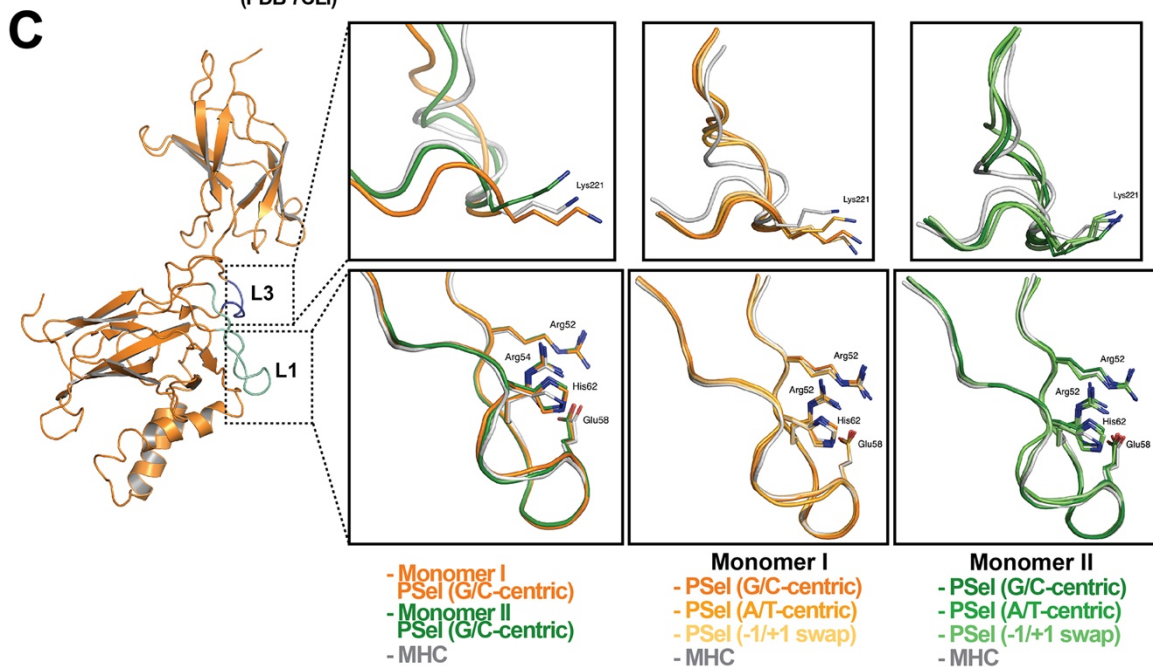

**Figure S3. Asymmetric p52 monomers.** (A-B) Schematic representation of the DNA contacts made by (A) the long p52:p52 (aa 1-398) with the 18bp natural PSeI-κB DNA (PDB 7CLI); and (B) the short p52:p52 (aa 1-327) with the 13bp PSeI(mutant A/T)-κB DNA (PDB 7W7L). Two colors indicate two different monomers within the complex. Arrows indicate H-bonds; cyan circles indicate van der Waals interactions. Arg52(s) from both monomers make cross-strand DNA contacts in (B) but not in (A). (C) Ribbon diagram of p52 monomer I, loops L1 (cyan) and L3 (blue) are highlighted. Residues in these two loops make base-specific contacts with DNA. The zoom-in views show overlays of loops L1 and L3 in (p52:p52)-PSeI and (p52:p52)-MHC complexes with indicated colors.

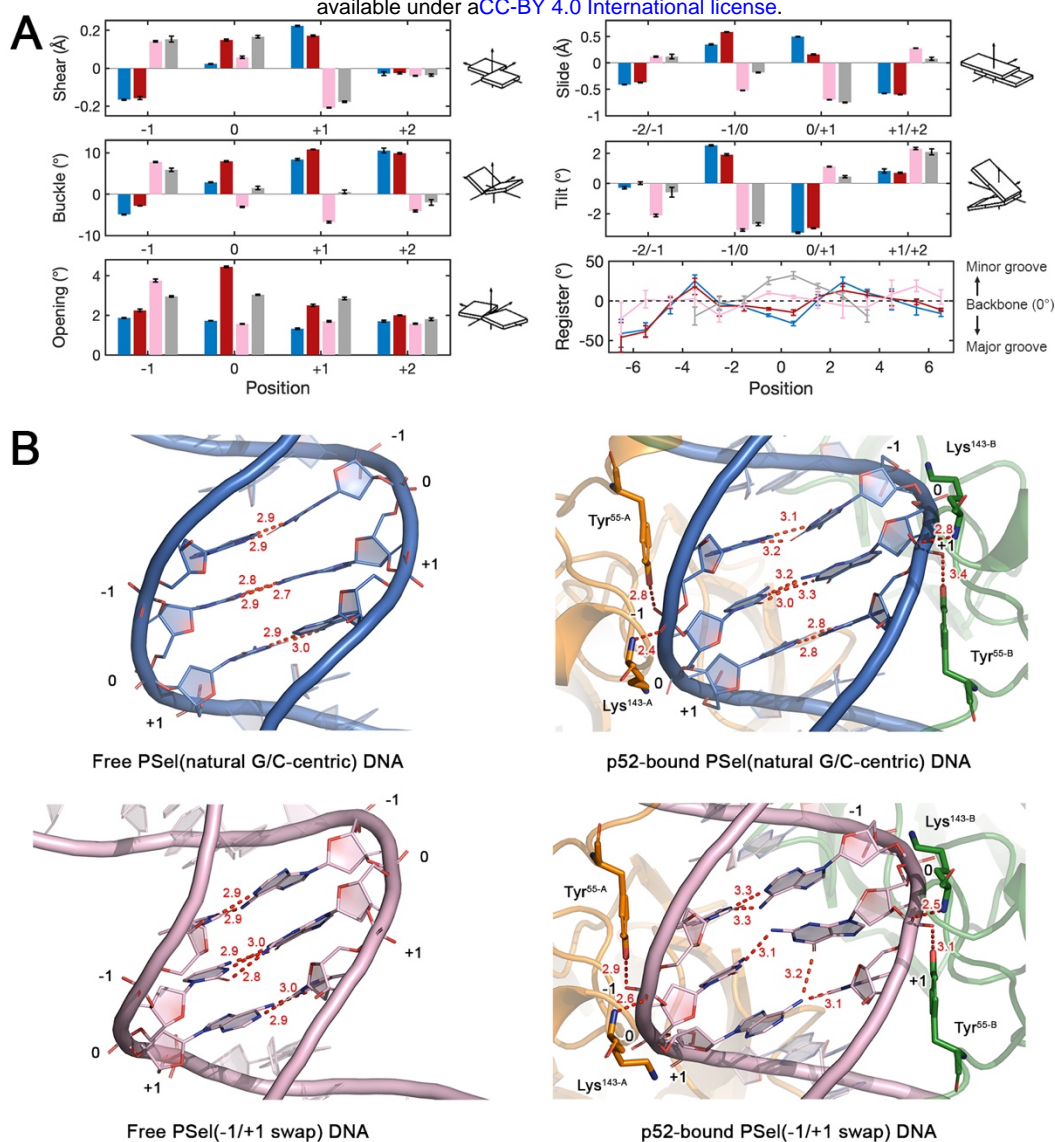

**Figure S4. Free DNA simulations.** (A) Geometric parameters at  $-1$  to  $+2$  positions revealed in the MD simulations. The swap of T and A at  $\pm 1$  positions causes an opposite shear and buckle of the nucleotide, which leads to a slide and tilt of the central bps towards the minor groove in  $-1/+1$  swap DNA and therefore narrows the central minor grooves; A:T has a larger shear and opening at the 0 position compared to G:C which might have led to the decrease in minor groove width at  $+1$  position. Geometrical parameters and the helical axes were calculated with Curves+ (Blanchet et al., 2011, Lavery et al., 2009). Corresponding schematic images of each parameter are viewed from the minor groove and shown in the positive sense. Error bars represent standard error of the mean (SEM) computed from the five replica simulations of a given system. (B) Structure of natural G/C-centric and  $-1/+1$  swap PSEL-kB DNA in (Left) free forms from MD simulations and (Right) (p52:p52)-bound forms from crystal structures. Red dashed lines represent the intermolecular H-bonds formed at DNA's central part.



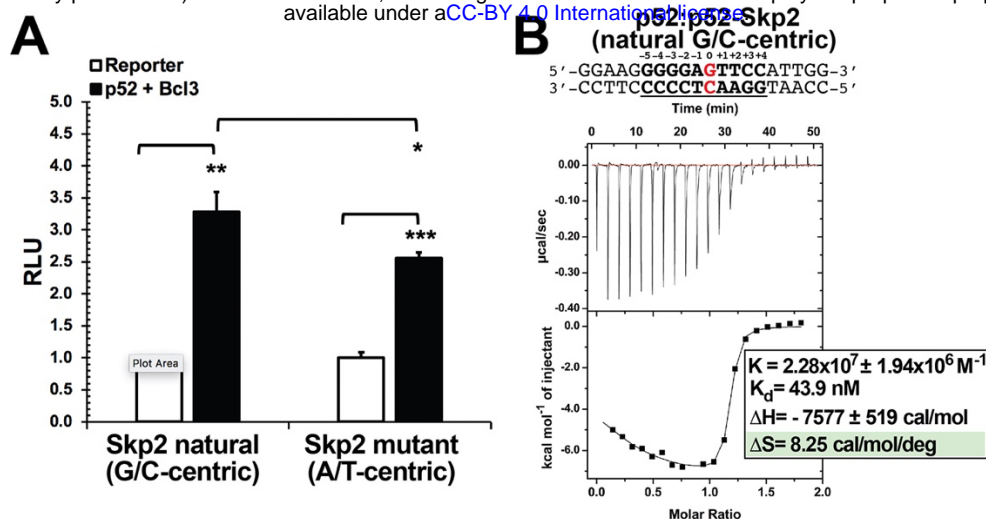

**Figure S5. p52 interacts with Skp2- $\kappa$ B DNA.** (A) The natural G/C-centric Skp2 luciferase reporter activity driven by co-expression of p52 and Bcl3; the corresponding A/T-centric mutant showed less transcription activity. The data were analyzed from three independent experiments performed in triplicate. RLU, relative luciferase unit. \* $p < 0.05$ ; \*\* $p < 0.01$ ; \*\*\* $p < 0.001$  (t test). Error bars represent SD. (B) Calorimetric titration data showing the binding of recombinant p52:p52 homodimer with Skp2 G/C-centric  $\kappa$ B DNA. The top panel of the ITC figures represent the binding isotherms; the bottom panel shows the integrated heat of the reaction and the line represents the best fit to the data according to a single-site binding model. The determined  $K_d$ , changes of enthalpy and entropy are shown on the bottom panel.

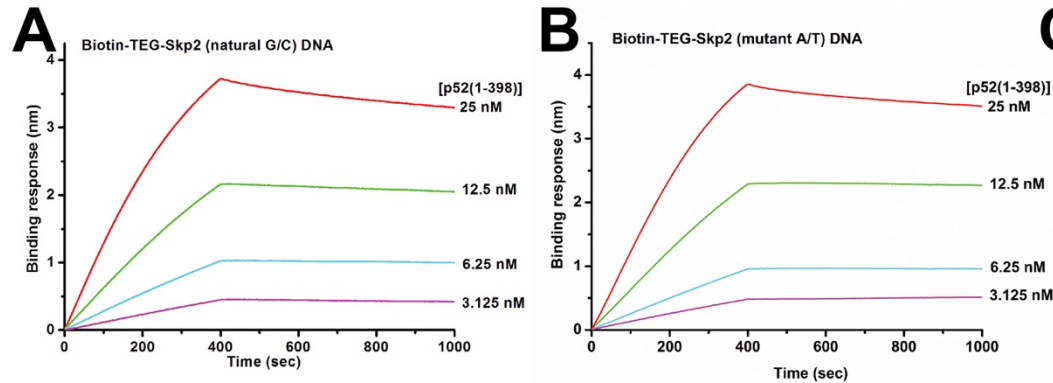

**C** Kinetic analysis of p52:p52 homodimer binding to Skp2-κB DNA variants by BLI

|                                    | Skp2(natural G/C-centric)                       | Skp2(mutant A/T-centric)                         |
|------------------------------------|-------------------------------------------------|--------------------------------------------------|
| $K_d$ (nM)                         | $1.91 \pm 0.019$ ( $2.24 \pm 0.029$ )           | $0.981 \pm 0.018$ ( $0.982 \pm 0.028$ )          |
| $k_{on}$ ( $M^{-1} \cdot s^{-1}$ ) | $0.857 \times 10^5$ ( $0.65 \times 10^5$ )      | $1.07 \times 10^5$ ( $0.91 \times 10^5$ )        |
| $k_{off}$ ( $s^{-1}$ )             | $1.63 \times 10^{-4}$ ( $1.46 \times 10^{-4}$ ) | $1.05 \times 10^{-4}$ ( $0.895 \times 10^{-4}$ ) |

Values reported represent the global fit to the data using 1:1 binding model shown in Fig. S6A - B. The experiments were done in duplicate, shown in parentheses.

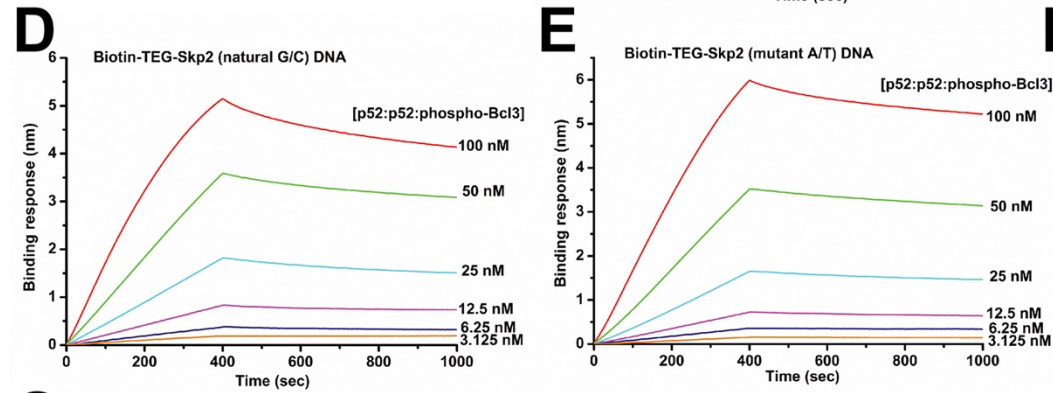

**F** Kinetic analysis of p52:p52:Bcl3 complex binding to Skp2-κB DNA variants by BLI

|                                    | Skp2(natural G/C-centric)                       | Skp2(mutant A/T-centric)                        |
|------------------------------------|-------------------------------------------------|-------------------------------------------------|
| $K_d$ (nM)                         | $13.8 \pm 0.158$ ( $10.2 \pm 0.114$ )           | $15.6 \pm 0.165$ ( $21.3 \pm 0.359$ )           |
| $k_{on}$ ( $M^{-1} \cdot s^{-1}$ ) | $0.228 \times 10^5$ ( $0.284 \times 10^5$ )     | $0.147 \times 10^5$ ( $0.0999 \times 10^5$ )    |
| $k_{off}$ ( $s^{-1}$ )             | $3.14 \times 10^{-4}$ ( $2.90 \times 10^{-4}$ ) | $2.29 \times 10^{-4}$ ( $2.13 \times 10^{-4}$ ) |

Values reported represent the global fit to the data using 1:1 binding model shown in Fig. S6D - E. The experiments were done in duplicate, shown in parentheses.

**G**

| κB DNA | Fold Change         | $K_d$ Ratio = $\frac{K_d(\text{Skp2 A/T-centric})}{K_d(\text{Skp2 G/C-centric})}$ |                    | $k_{on}$ Ratio = $\frac{k_{on}(\text{Skp2 A/T-centric})}{k_{on}(\text{Skp2 G/C-centric})}$ |                    | $k_{off}$ Ratio = $\frac{k_{off}(\text{Skp2 A/T-centric})}{k_{off}(\text{Skp2 G/C-centric})}$ |                    | $RLU$ Ratio = $\frac{RLU(\text{Skp2 A/T-centric})}{RLU(\text{Skp2 G/C-centric})}$ |
|--------|---------------------|-----------------------------------------------------------------------------------|--------------------|--------------------------------------------------------------------------------------------|--------------------|-----------------------------------------------------------------------------------------------|--------------------|-----------------------------------------------------------------------------------|
|        |                     | (p52:p52)-DNA                                                                     | (p52:p52:Bcl3)-DNA | (p52:p52)-DNA                                                                              | (p52:p52:Bcl3)-DNA | (p52:p52)-DNA                                                                                 | (p52:p52:Bcl3)-DNA | (p52:p52:Bcl3)-DNA                                                                |
| Skp2   | natural G/C-centric | 1.00                                                                              | 1.00               | 1.00                                                                                       | 1.00               | 1.00                                                                                          | 1.00               | 1.00                                                                              |
|        | mutant A/T-centric  | 0.47                                                                              | 1.54               | 1.31                                                                                       | 0.48               | 0.63                                                                                          | 0.73               | 0.78                                                                              |

**Figure S6. p52 and Skp2-κB DNA binding kinetics.** (A-B) BLI binding analysis of p52:p52 (aa 1-398) homodimer to immobilized biotin labeled (A) Skp2 natural G/C-centric and (B) mutant A/T-centric DNAs. Each experiment was done in duplicate and one representative set of curves is shown. (C) Table showing the kinetic analysis in (A) and (B). (D-E) BLI binding analysis of p52:p52:Bcl3 complex to immobilized biotin labeled (D) Skp2 natural G/C-centric and (E) mutant A/T-centric DNAs. Each experiment was done in duplicate and one representative set of curves is shown. (F) Table showing the kinetic analysis in (D) and (E). (G) Table summarizing the fold change of  $K_d$ ,  $k_{on}$  and  $k_{off}$  with respect to the more transcriptionally active G/C-centric Skp2-κB DNA. The average values of the duplicated kinetics data in (A-F) and the relative reporter activities in RLU from Fig. S5A were used for ratio calculations. The numbers for the greater reporter active G/C-centric Skp2 DNAs are shown in blue.

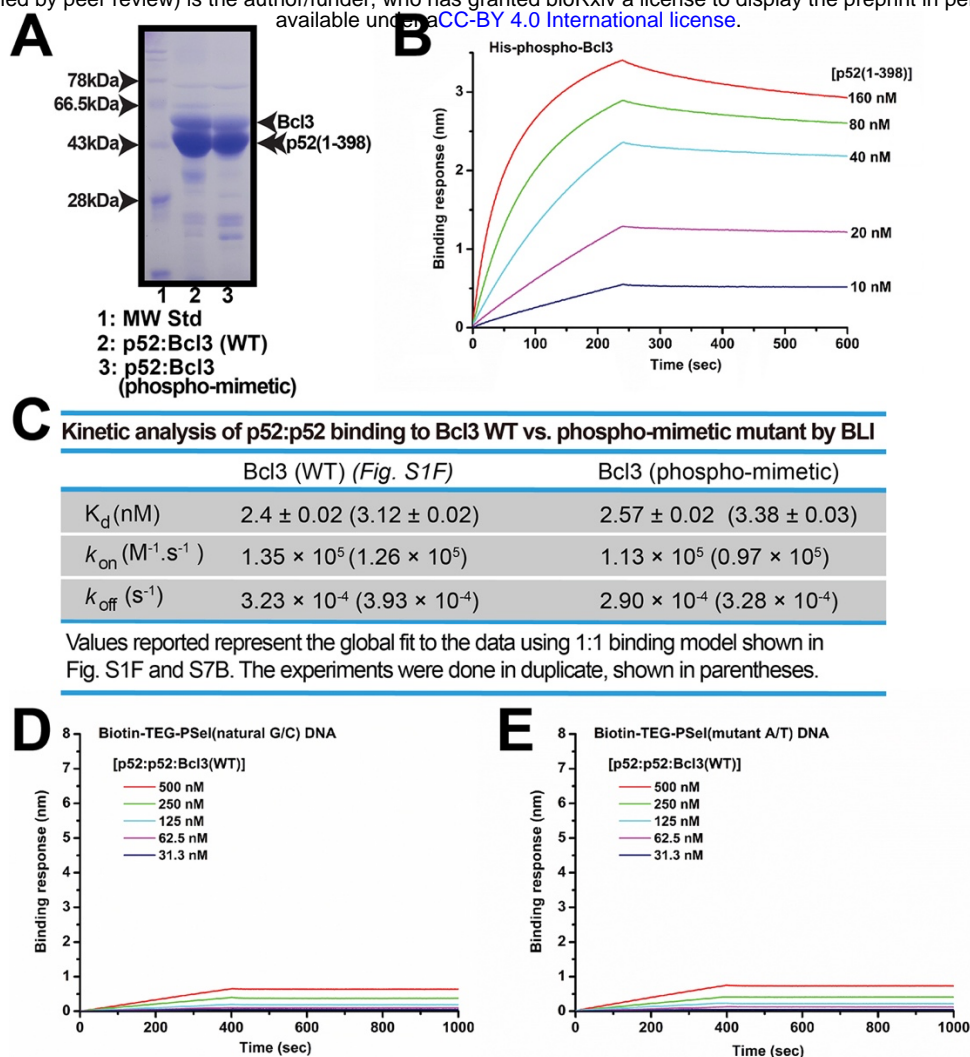

**Figure S7. Recombinant phospho-mimetic Bcl3 forms a ternary complex with p52 and  $\kappa$ B DNA.** (A) SDS-PAGE analysis showing the p52:p52:Bcl3 WT vs. phospho-mimetic mutant complexes with similar purity. (B) BLI analysis of p52 to immobilized His-tagged-Bcl3 phospho-mimetic mutant protein. (C) Table showing the kinetic analysis in Figures S1F and S7B, suggesting p52:p52 homodimer interacts with WT and phospho-mimetic Bcl3 with similar affinity and kinetics. (D-E) BLI analysis of p52:p52:Bcl3 (WT) complex to immobilized PSeI (D) natural G/C-centric and (E) mutant A/T-centric DNAs. The WT complex does not interact with either DNAs. Each experiment was done in duplicate and one representative set of curves is shown.

**Table S1. Summary of protein-DNA contacts.**

|              | p52:p52-PseI(natural G/C-centric)_18bp (PDB 7CLI)<br>(this study) |            |              |                |           |              | p52:p52-PseI(mutant A/T-centric)_18bp (PDB 7VUQ)<br>(this study) |            |              |                |           |              | p52:p52-PseI(-1/+1 SWAP)_18bp (PDB 7VUP)<br>(this study) |            |              |                |            |              |
|--------------|-------------------------------------------------------------------|------------|--------------|----------------|-----------|--------------|------------------------------------------------------------------|------------|--------------|----------------|-----------|--------------|----------------------------------------------------------|------------|--------------|----------------|------------|--------------|
|              | p52 Monomer I                                                     |            |              | p52 Monomer II |           |              | p52 Monomer I                                                    |            |              | p52 Monomer II |           |              | p52 Monomer I                                            |            |              | p52 Monomer II |            |              |
|              | DNA                                                               | Protein    | Distance (Å) | DNA            | Protein   | Distance (Å) | DNA                                                              | Protein    | Distance (Å) | DNA            | Protein   | Distance (Å) | DNA                                                      | Protein    | Distance (Å) | DNA            | Protein    | Distance (Å) |
| Backbone     | A(+7) OP2                                                         | Ser61 OG   | 2.79         | A(-7) OP2      | Ser61 OG  | 3.13         | A(+7) OP2                                                        | Ser61 OG   | 2.66         | A(-7) OP2      | Ser61 OG  | 3.13         | A(+7) OP2                                                | Ser61 OG   | 2.75         | A(-7) OP2      | Ser61 OG   | 2.61         |
|              | A(+6) N7                                                          | Ser61 O    | x(3.49)      | G(-6) N7       | Ser61 O   | x(3.85)      | A(+6) N7                                                         | Ser61 O    | x(3.57)      | G(-6) N7       | Ser61 O   | 3.08         | A(+6) N7                                                 | Ser61 O    | 3.28         | G(-6) N7       | Ser61 O    | 3.20         |
| Base contact | x                                                                 | x          | x            | G(-6) OP1      | Lys75 NZ  | 3.13         | x                                                                | x          | x            | G(-5) OP1      | Lys75 NZ  | x(6.79)      | x                                                        | x          | x            | G(-5) OP1      | Lys75 NZ   | x(4.78)      |
|              | G(+5) O6                                                          | His62 ND1  | 3.26         | G(-5) O6       | His62 ND1 | x(3.57)      | G(+5) O6                                                         | His62 ND1  | 3.12         | G(-5) O6       | His62 ND1 | x(3.67)      | G(+5) O6                                                 | His62 ND1  | x(3.43)      | G(-5) O6       | His62 ND1  | x(3.62)      |
|              | G(+5) N7                                                          | Arg54 NH2  | 2.93         | G(-5) N7       | Arg54 NH2 | 2.80         | G(+5) N7                                                         | Arg54 NH2  | 2.88         | G(-5) N7       | Arg54 NH2 | 3.09         | G(+5) N7                                                 | Arg54 NH2  | 3.10         | G(-5) N7       | Arg54 NH2  | x(3.52)      |
|              | G(+4) O6                                                          | Arg54 NH1  | 3.08         | G(-4) O6       | Arg54 NH1 | 3.19         | G(+4) O6                                                         | Arg54 NH1  | 3.16         | G(-4) O6       | Arg54 NH1 | 3.36         | G(+4) O6                                                 | Arg54 NH1  | 3.03         | G(-4) O6       | Arg54 NH1  | 2.76         |
|              | G(+4) N7                                                          | Arg54 NH2  | x(4.48)      | G(-4) N7       | Arg54 NH2 | x(4.54)      | G(+4) N7                                                         | Arg54 NH2  | x(4.65)      | G(-4) N7       | Arg54 NH2 | x(4.50)      | G(+4) N7                                                 | Arg54 NH2  | x(4.18)      | G(-4) N7       | Arg54 NH2  | x(3.88)      |
|              | G(+3) O6                                                          | Arg54 NH1  | x(3.66)      | G(-3) O6       | Arg54 NH1 | x(3.63)      | G(+3) O6                                                         | Arg54 NH1  | x(3.45)      | G(-3) O6       | Arg54 NH1 | x(3.84)      | G(+3) O6                                                 | Arg54 NH1  | x(3.65)      | G(-3) O6       | Arg54 NH1  | x(3.91)      |
|              | G(+3) N7                                                          | Arg52 NH1  | 3.27         | G(-3) N7       | Arg52 NH1 | 3.22         | G(+3) N7                                                         | Arg52 NH1  | 3.08         | G(-3) N7       | Arg52 NH1 | 3.27         | G(+3) N7                                                 | Arg52 NH1  | 2.92         | G(-3) N7       | Arg52 NH1  | 3.16         |
|              | G(+2) O6                                                          | Arg52 NH1  | x(3.92)      | G(-2) O6       | Arg52 NH1 | x(4.53)      | G(+2) O6                                                         | Arg52 NH1  | x(4.34)      | G(-2) O6       | Arg52 NH1 | x(3.80)      | G(+2) O6                                                 | Arg52 NH1  | x(3.72)      | G(-2) O6       | Arg52 NH1  | 2.94         |
|              | G(+2) N7                                                          | Arg52 NH1  | x(4.14)      | G(-2) N7       | Arg52 NH1 | 2.76         | G(+2) N7                                                         | Arg52 NH1  | 3.27         | G(-2) N7       | Arg52 NH1 | x(3.86)      | G(+2) N7                                                 | Arg52 NH1  | x(3.73)      | G(-2) N7       | Arg52 NH1  | x(3.96)      |
|              | G(+2) O6                                                          | Arg52 NH2  | 3.19         | G(-2) O6       | Arg52 NH2 | x(3.71)      | G(+2) O6                                                         | Arg52 NH2  | 2.41         | G(-2) O6       | Arg52 NH2 | 2.74         | G(+2) O6                                                 | Arg52 NH2  | 2.87         | G(-2) O6       | Arg52 NH2  | 3.15         |
|              | G(+2) N7                                                          | Arg52 NH1  | 3.24         | G(-2) N7       | Arg52 NH1 | x(4.30)      | G(+2) N7                                                         | Arg52 NH1  | 3.37         | G(-2) N7       | Arg52 NH1 | x(3.48)      | G(+2) N7                                                 | Arg52 NH1  | 3.17         | G(-2) N7       | Arg52 NH1  | x(3.71)      |
|              | G(+2) O6                                                          | Lys221 NZ  | 2.63         | G(-2) O6       | Lys221 NZ | x(4.46)      | G(+2) O6                                                         | Lys221 NZ  | x(3.53)      | G(-2) O6       | Lys221 NZ | x(3.56)      | G(+2) O6                                                 | Lys221 NZ  | 2.13         | G(-2) O6       | Lys221 NZ  | x(5.29)      |
| Backbone     | G(-2) OP1                                                         | Gln284 NE2 | 2.79         | x              | x         | x            | G(-2) OP1                                                        | Gln284 NE2 | 2.73         | x              | x         | x            | G(-2) OP1                                                | Gln284 NE2 | 2.44         | G(-2) OP1      | Gln284 NE2 | 2.54         |
|              | x                                                                 | x          | x            | x              | x         | x            | x                                                                | x          | x            | x              | x         | x            | x                                                        | x          | x            | x              | x          | x            |
|              | T(-1) OP1                                                         | Pro223 CB  | 3.15         | T(+1) OP1      | Pro223 CB | 3.28         | T(-1) OP1                                                        | Pro223 CB  | 3.35         | T(+1) OP1      | Pro223 CB | x(3.49)      | A(-1) OP1                                                | Pro223 CB  | 3.29         | A(+1) OP1      | Pro223 CB  | x(3.51)      |
|              | G(0) OP1                                                          | Pro223 CD  | x(3.76)      | x              | x         | x            | G(0) OP1                                                         | Pro223 CD  | x(4.31)      | x              | x         | x            | G(0) OP1                                                 | Pro223 CD  | x(3.82)      | x              | x          | x            |
|              | A(+1) OP2                                                         | Lys143 NZ  | x(3.77)      | C(0) OP1       | x         | x            | A(0) OP1                                                         | Pro223 CG  | x(4.47)      | T(0) OP1       | x         | x            | G(0) OP1                                                 | Pro223 CG  | x(3.89)      | C(0) OP1       | x          | x            |
|              | A(+1) OP1                                                         | Tyr55 OH   | 3.40         | A(-1) OP2      | Tyr55 OH  | 3.78         | A(+1) OP2                                                        | Tyr55 OH   | 2.71         | A(-1) OP2      | Tyr55 OH  | 2.55         | T(+1) OP2                                                | Tyr55 OH   | 3.05         | T(-1) OP2      | Tyr55 OH   | 2.94         |
|              | C(+2) OP2                                                         | Thr142 C   | x(4.14)      | A(-1) OP1      | Thr142 C  | 3.27         | A(+1) OP1                                                        | Thr142 C   | 3.28         | A(-1) OP1      | Thr142 C  | x(3.58)      | T(+1) OP1                                                | Thr142 C   | 3.33         | T(-1) OP1      | Thr142 C   | x(3.42)      |
|              | C(+2) O5'                                                         | Thr142 CA  | x(3.74)      | C(-2) OP2      | Thr142 CA | 3.20         | A(+1) OP1                                                        | Thr142 CA  | 3.12         | A(-1) OP1      | Thr142 CA | 3.39         | T(+1) OP1                                                | Thr142 CA  | 3.32         | T(-1) OP1      | Thr142 CA  | 3.35         |
|              | C(+2) O5'                                                         | Lys143 N   | 2.79         | A(-1) OP1      | Lys143 N  | 2.45         | C(+2) OP2                                                        | Lys143 N   | 2.57         | C(-2) OP2      | Lys143 N  | 2.84         | C(+2) OP2                                                | Lys143 N   | 2.47         | C(-2) OP2      | Lys143 N   | 2.59         |
|              | C(+2) O5'                                                         | Cys57 SG   | x(3.41)      | C(-2) O5'      | Cys57 SG  | 3.36         | C(+2) O5'                                                        | Cys57 SG   | x(3.72)      | C(-2) O5'      | Cys57 SG  | 3.08         | C(+2) O5'                                                | Cys57 SG   | 3.09         | C(-2) O5'      | Cys57 SG   | 3.35         |
|              | C(+2) N4                                                          | x          | x            | C(-2) N4       | x         | x            | C(+2) N4                                                         | x          | x            | C(-2) N4       | x         | x            | C(+2) N4                                                 | x          | x            | C(-2) N4       | x          | x            |
|              | C(+3) N4                                                          | Arg52 NH2  | x(3.57)      | C(-3) N4       | Arg52 NH2 | x(4.40)      | C(+3) N4                                                         | Arg52 NH2  | x(3.56)      | C(-3) N4       | Arg52 NH2 | x(3.72)      | C(+3) N4                                                 | Arg52 NH2  | x(3.47)      | C(-3) N4       | Arg52 NH2  | 3.27         |
| C(+4) N4     | Glu58 OE1                                                         | 3.04       | C(-4) N4     | Glu58 OE1      | 3.23      | C(+4) N4     | Glu58 OE1                                                        | 2.91       | C(-4) N4     | Glu58 OE1      | 3.06      | C(+4) N4     | Glu58 OE1                                                | x(3.43)    | C(-4) N4     | Glu58 OE1      | x(3.69)    |              |
| C(+4) N4     | Glu58 O                                                           | 3.32       | C(-4) N4     | Glu58 O        | x(4.47)   | C(+4) N4     | Glu58 O                                                          | x(3.73)    | C(-4) N4     | Glu58 O        | x(3.77)   | C(+4) N4     | Glu58 O                                                  | x(4.10)    | C(-4) N4     | Glu58 O        | x(5.98)    |              |

Blue: Base specific contacts  
 Black: Phosphate backbone contacts  
 x(number): No H-bonds (distance more than 3.40Å), numbers in parentheses are distances shown as references  
 Yellow highlight: Most significantly different regions in p52-P-Selectin structure vs. previous known NF-κB-DNA structures

## References

- BLANCHET, C., PASI, M., ZAKRZEWSKA, K. & LAVERY, R. 2011. CURVES+ web server for analyzing and visualizing the helical, backbone and groove parameters of nucleic acid structures. *Nucleic Acids Res*, 39, W68-73.
- CHEN, Y. Q., GHOSH, S. & GHOSH, G. 1998. A novel DNA recognition mode by the NF-kappa B p65 homodimer. *Nat Struct Biol*, 5, 67-73.
- CRAMER, P., LARSON, C. J., VERDINE, G. L. & MULLER, C. W. 1997. Structure of the human NF-kappaB p52 homodimer-DNA complex at 2.1 Å resolution. *EMBO J*, 16, 7078-90.
- FUSCO, A. J., HUANG, D. B., MILLER, D., WANG, V. Y., VU, D. & GHOSH, G. 2009. NF-kappaB p52:RelB heterodimer recognizes two classes of kappaB sites with two distinct modes. *EMBO Rep*, 10, 152-9.
- HUANG, D. B., PHELPS, C. B., FUSCO, A. J. & GHOSH, G. 2005. Crystal structure of a free kappaB DNA: insights into DNA recognition by transcription factor NF-kappaB. *J Mol Biol*, 346, 147-60.
- LAVERY, R., MOAKHER, M., MADDOCKS, J. H., PETKEVICIUTE, D. & ZAKRZEWSKA, K. 2009. Conformational analysis of nucleic acids revisited: Curves+. *Nucleic Acids Res*, 37, 5917-29.
